# Supplementary material for: FlkO, a penicillin-binding protein-type thioesterase in cyclofaulknamycin biosynthesis
Source: Royal Society of Chemistry journal article supplement (doi:10.1039/d4ob00907j), 2024-01-01
Supplement: d4ob00907j1.pdf [file d4ob00907j1.pdf]

## **FlkO, a penicillin-binding protein-type thioesterase in cyclofaulknamycin biosynthesis**

Kenichi Matsuda,\* Rintaro Ichihara, and Toshiyuki Wakimoto\*

---

Faculty of Pharmaceutical Sciences, Hokkaido University, Kita 12, Nishi 6, Kita-ku, Sapporo 060-0812, Japan

E-mail: kematsuda@pharm.hokudai.ac.jp

E-mail: wakimoto@pharm.hokudai.ac.jp

---

## Table of Contents

### Experimental procedures

General remarks

Cultivation and metabolite analysis of *Streptomyces albidoflavus* NBRC12854

Chemical synthesis

Construction of expression plasmid and host

Preparation of recombinant enzymes

*In vitro* enzymatic reactions

### Supplementary Tables

**Table S1.** Conditions of HPLC analysis

### Supplementary Figures

**Figure S1.** cyclofaulknamycin BGC (*flk*) in *S. albidoflavus* NBRC12854

**Figure S2.** Production of cyclofaulknamycin and iso-faulknamicin by *S. albidoflavus* NBRC12854

**Figure S3.** SDS-PAGE of MBP-FlkO

**Figure S4.** Effect of cosolvent in enzymatic reaction of FlkO

**Figure S5.** LC comparison of FlkO enzymatic reaction product and synthetic **1**

**Figure S6.** Effect of MBP-tag removal

**Figure S7.** Effect of glycerol concentration on FlkO-mediated cyclization

**Figure S8.** Substrate-enzyme concentration ratio

**Figure S9.** Michaelis-Menten plots of MBP-FlkO with **2** as a substrate

**Figure S10-S36.** *In vitro* enzymatic reaction of FlkO using substrates **2-28**

**Figure S37-S81.** MS2 spectra of substrates and reaction products

**Figure S82.** <sup>1</sup>H NMR (500 Hz) spectrum of **1** in DMSO-*d*<sub>6</sub>

**Figure S83.** <sup>13</sup>C NMR (125 Hz) spectrum of **1** in DMSO-*d*<sub>6</sub>

**Figure S84.** <sup>1</sup>H NMR (500 Hz) spectrum of **2** in DMSO-*d*<sub>6</sub>

**Figure S85.** <sup>13</sup>C NMR (125 Hz) spectrum of **2** in DMSO-*d*<sub>6</sub>

### References

---

## Experimental Procedures

### General remarks

$^1\text{H}$  and  $^{13}\text{C}$  NMR spectra were recorded on JEOL ECS 400 spectrometer (400 MHz for  $^1\text{H}$  NMR). Chemical shifts were denoted in  $\delta$  (ppm) relative to residual solvent peaks as internal standard (DMSO- $d_6$ ,  $^1\text{H}$   $\delta$  2.50,  $^{13}\text{C}$   $\delta$  39.5). Electrospray ionization mass spectrometry (ESI-MS) were performed by a Thermo Scientific Exactive mass spectrometer, an amaZon SL-NPC (Bruker Daltonics), and a Shimadzu LC-MS-2020 spectrometer. Optical rotations were recorded on a JASCO P-1030 polarimeter. MS/MS analysis were performed with amaZon SL-NPC (Bruker Daltonics) using helium gas with amplitude value 1.0 V. High-performance liquid chromatography (HPLC) experiments were performed with a Shimadzu HPLC system (LC-2050). All reagents were used as supplied unless otherwise stated. *Escherichia coli* DH5a was used as a host for general cloning.

### Cultivation and metabolite analysis of *Streptomyces albidoflavus* NBRC12854

A single colony of *S. albidoflavus* NBRC12854 was inoculated in TSB medium and cultured at 30 °C for 2–4 days as seed culture. 1.0 ml of broth was transferred to 100 ml of K media (2.5% soluble starch, 1.5% soya flour, 0.2% dry yeast, 0.4% precipitated calcium carbonate, pH of the media was adjusted to 6.2) and cultivated at 30 °C for 4 days. Culture broth was extracted by 200 ml of acetone and debris were filtered off. After removing solvent, residues were dissolved into DMSO and analyzed by LC-MS. amaZon SL-NPC (positive mode) equipped with reversed phase column COSMOSIL 5C<sub>18</sub>-MS-II 2.0 mm I.D.  $\times$  150 mm. Column was eluted by H<sub>2</sub>O/MeCN containing 0.05% TFA, with gradient mode from 2-90% for MeCN in 20 min. Flow rate was set at 0.2 mL/min.

### Chemical synthesis

#### **General SPPS procedure for peptide with ethylene glycol at C-terminus**

Enzyme substrates used in this study were synthesized by the modified SPPS described previously<sup>1</sup> (step 1–8). Substrates used in this study were synthesized from 10  $\mu\text{mol}$  of **S3** (Fmoc-D-aa-**S2**). Thus, the volumes of reagents were described for the synthesis at a 10  $\mu\text{mol}$  scale.

**Step 1:** 2-chlorotriethyl resin (0.38 mmol) **S1** in Libra tube was swelled with DCM (dichloromethane) for 10 min, and then excess solvent was removed by filtration. To the resin was added a solution of ethylene glycol (EG) (1.50 mmol), and *i*-Pr<sub>2</sub>NEt (250  $\mu\text{L}$ , 1.50 mmol) in DCM (2.0 mL), and shaken for 2 h at 37 °C to give diol-2-chlorotriethyl resins **S2**. To the resin was added a solution of Fmoc-amino acid (1.50 mmol), DIC (3.78 mmol) and DMAP (cat.) in DCM (2.0 mL) and stirred for 3 h at 37 °C to give Fmoc-aa-diol-2-chlorotriethyl resins **S3**. Dried **S3** (5.0 mg) was added with 20% piperidine in DMF, and stirred for 1 h. The supernatant was diluted with DMF, and was subjected to UV measurement at 301 nm. Typically, loading rates for **S3** are ranging from 0.24-0.45 mmol g<sup>-1</sup>.

**Step 2:** Fmoc group of the solid supported peptide was removed by using 360  $\mu\text{L}$  of 20% piperidine/DMF solution. Reaction vessel was left for 10 min at room temperature. This step was repeated twice.

**Step 3:** The resin in the reaction vessel was washed with DMF (×3) and DCM (×3).

**Step 4:** To the solution of Fmoc amino acid (4 eq in 189  $\mu\text{L}$  DMF) were added 30  $\mu\text{L}$  of *N,N*-diisopropylcarbodiimide (DIC, 0.50 M in DMF) 112.5  $\mu\text{L}$  Oxyma Pure (0.50 M in DMF) and 28.5  $\mu\text{L}$  NMP (*N*-Methyl-2-pyrrolidone). After 3 min of pre-activation, the mixture was injected to the reaction vessel. The resulting mixture was left for 15 min at room temperature. After washing the resin with 200  $\mu\text{L}$  DCM, the coupling procedure was repeated, then solution was filtered off.

**Step 5:** 360  $\mu\text{L}$  of 5%  $\text{Ac}_2\text{O}$  in DMF was added and the mixture was left for 5 min at room temperature.

**Step 6:** The resin in the reaction vessel was washed with DMF (×3) and DCM (×3).

Fmoc amino acids were condensed onto the solid support by repeating Step 2–6.

**Step 7:** N-terminal Fmoc group was removed on solid support by the procedure in Step 2, then the peptide was cleaved from the solid support by adding deprotection cocktail TFA/ $\text{H}_2\text{O}$ /*i*-Pr<sub>3</sub>SiH/DODT (3,6-dioxa-1,8-octanedithiol) = 92.5:2.5:2.5:2.5 (500  $\mu\text{L}$ ). The solid support was exposed to the deprotection cocktail for 3 hours and the solid support was filtered off.

**Step 8:** The filtrate was diluted with Et<sub>2</sub>O (25 mL) and was chilled ( $-80\text{ }^\circ\text{C}$ ), then centrifuged with  $3,500 \times g$  for 10 min at  $4\text{ }^\circ\text{C}$  to afford crude peptide. The crude peptide was further purified by HPLC when necessary. The column (COSMOSIL 5C<sub>18</sub>-MS-II 20 mm I.D.  $\times$  250 mm) was eluted by MeCN: $\text{H}_2\text{O}$  (= 40:60) containing 0.05% TFA with flow rate at 10 ml/min to afford a pure peptide.

## Synthesis of 2

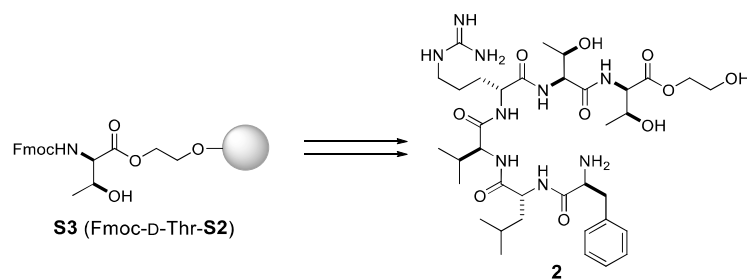

Fmoc-D-Thr-S2 was synthesized by following the Step 1. Compound 2 was synthesized from 10  $\mu\text{mol}$  of Fmoc-D-Thr-S2 by following the step 1–8 described above. As a result, 15.8 mg of pure 2 (68.9% for 15 steps) was obtained as a white solid.

**2:**  $[\alpha]_D^{18} +20.66$  (*c* 0.92, DMSO); <sup>1</sup>H-NMR (400 MHz, DMSO-*d*<sub>6</sub>)  $\delta$  8.68 (s, 2H), 8.32 (d, *J* = 9.0 Hz, 1H), 8.00 (d, *J* = 9.0 Hz, 1H), 7.94 (d, *J* = 8.1 Hz, 1H), 7.20-7.29 (m, 10H), 5.13 (s, 2H), 4.88 (s, 1H), 4.23-4.43 (m, 4H), 4.11 (s, 2H),

4.01 (m, 2H), 3.93 (m, 1H), 3.53 (t,  $J = 5.2$  Hz, 3H), 3.30 (s, 2H), 2.97-3.07 (m, 3H), 2.89 (m, 2H), 1.99 (m, 1H), 1.61 (m, 2H), 1.45 (m, 2H), 1.28 (m, 2H), 1.04 (d,  $J = 6.3$  Hz, 3H), 0.99 (d,  $J = 6.3$  Hz, 3H), 0.79 (d,  $J = 4.4$  Hz, 3H), 0.78 (d,  $J = 4.4$  Hz, 3H), 0.70 (d,  $J = 6.0$  Hz, 3H), 0.66 (d,  $J = 6.0$  Hz, 3H),  $^{13}\text{C}$ -NMR (100 MHz,  $\text{DMSO-}d_6$ )  $\delta$  171.8, 171.6, 171.4, 170.6, 170.3, 168.0, 156.83, 135.2, 129.4 (2 $\times$ CH), 128.5 (2 $\times$ CH), 127.0, 66.8, 66.4, 66.2 (2 $\times$ CH), 58.9 (3 $\times$ CH), 58.2, 53.7, 51.2, 44.03, 40.4 (2 $\times$ CH), 23.9, 23.1 (2 $\times$ CH<sub>3</sub>), 21.2, 20.0, 19.5 (2 $\times$ CH<sub>3</sub>), 19.4 (2 $\times$ CH<sub>3</sub>), 18.8; HRMS (ESI) calcd for  $\text{C}_{36}\text{H}_{62}\text{O}_{10}\text{N}_9^+$   $[\text{M}+\text{H}]^+$  780.46142, found 780.45879

## Synthesis of 1

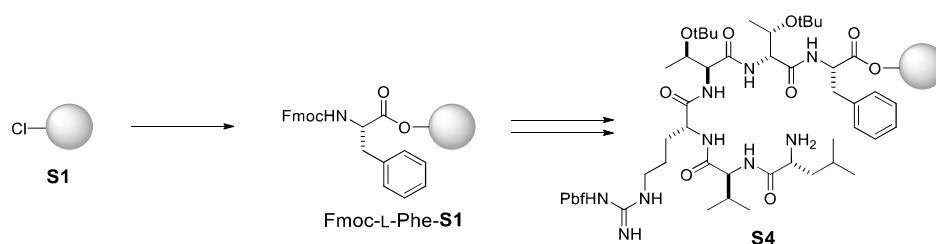

2-Chlorotrityl resin (**S1**) (15 mg, 0.019 mmol) in Libra tube was swollen with DCM for 30 min, and then excess solvent was removed by filtration. To the resin was added a solution of Fmoc-L-Phe-OH (29 mg, 0.076 mmol) and *i*-Pr<sub>2</sub>NEt (12.6  $\mu\text{L}$ , 0.076 mmol) in DCM (0.5 mL), and stirred for 1 h at 40 °C. The reaction mixture was filtered, washed with DMF ( $\times$  3), DCM ( $\times$  3), methanol, and Ac<sub>2</sub>O/DCM = 1:4, then dried under vacuum for 1 h to give Fmoc-L-Phe-**S1**. Fmoc-L-Phe-**S1** was swelled in DCM for 1 h, which was subjected to 5 cycles [Fmoc-D-Thr(*t*Bu)-OH, Fmoc-L-Thr(*t*Bu)-OH, Fmoc-D-Arg(Pbf)-OH, Fmoc-L-Val-OH, Fmoc-D-Leu-OH] of SPPS protocol described above (Step 2-6) to afford resin bound octapeptide **S4**.

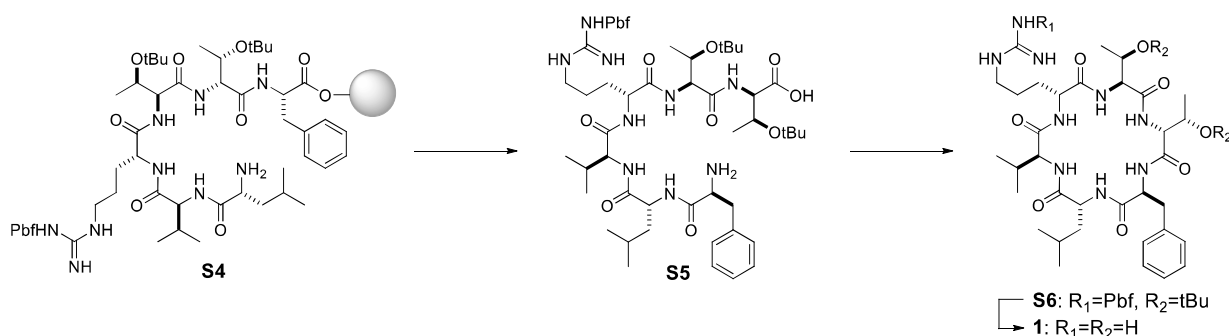

To the peptide **S4** was added DCM/ $(\text{CF}_3)_2\text{CHOH}$  (= 80: 20) (2.0 mL), being stirred for 20 min, and the reaction product was filtered. Removal of solvent afforded peptide **S5**, which was used to the next reaction without further purification. **S5** was dissolved in DCM/DMF (= 9:1) (20 mL) and to the solution were added *i*-Pr<sub>2</sub>NEt (9.4  $\mu\text{L}$ , 0.057 mmol), HOAt (7.7 mg, 0.057 mmol) and PyBOP (30 mg, 0.057 mmol). After stirred overnight at 40 °C, the reaction mixture was extracted with DCM ( $\times$  3), washed with brine, dried over  $\text{MgSO}_4$ , and concentrated to afford crude peptide **S6**. To **S6** residue was added TFA/ $\text{H}_2\text{O}/i\text{-Pr}_3\text{SiH}/\text{DODT}$  = 92.5:2.5:2.5:2.5 (1 mL), being stirred for 180 min, and then the reaction mixture was filtered. The filtrate was diluted with Et<sub>2</sub>O (12 mL) and was chilled ( $-80$  °C), then centrifuged with 3,500  $\times g$  for 10 min at 4 °C to afford crude peptide **1**. The crude **1** was purified with reversed phase HPLC equipped with

COSMOSIL 5C<sub>18</sub>-MS-II 10 mm I.D. × 250 mm. The column was eluted by MeOH:H<sub>2</sub>O (= 55:45) containing 0.05% TFA with flow rate at 3.2 ml/min to afford a pure peptide **1** (3.8 mg, 28% for 15 steps) as a white solid.

**1**: [ $\alpha$ ]<sub>D</sub><sup>18</sup> +12.47 (*c* 0.29, DMSO); <sup>1</sup>H-NMR (400 MHz, DMSO-*d*<sub>6</sub>)  $\delta$  8.26 (m, 1H), 8.20 (m, 2H), 7.93 (m, 2H), 7.78 (m, 1H), 7.66 (m, 1H), 7.21 (m, 5H), 5.43 (m, 2H), 4.52 (m, 1H), 4.37 (m, 2H), 4.20 (m, 1H), 4.04 (m, 2H), 3.90 (m, 1H), 3.76 (m, 1H), 3.16 (m, 1H), 3.10 (m, 1H), 2.93 (m, 1H), 2.79 (m, 1H), 2.54 (m, 1H), 1.92 (m, 1H), 1.69 (m, 1H), 1.49 (m, 1H), 1.30 (m, 1H), 1.23 (m, 6H), 1.03 (m, 2H), 0.81 (m, 12H), <sup>13</sup>C-NMR (100 MHz, DMSO-*d*<sub>6</sub>)  $\delta$  171.4, 171.1, 171.0, 170.1, 169.9, 169.7, 156.8, 137.6, 129.3 (2×CH), 128.0 (2×CH), 126.2, 66.4, 65.8, 63.1, 58.6, 57.9, 53.7, 51.7, 50.5, 48.6, 40.4, , 37.2, 29.9, 25.1, 24.0, 22.8, 22.1, 20.5, 20.0, 19.9, 19.3, 18.5

HRMS (ESI) calcd for C<sub>34</sub>H<sub>56</sub>O<sub>8</sub>N<sub>9</sub><sup>+</sup> [M+H]<sup>+</sup> 718.42464, found 718.42293

### **Construction of expression plasmid and host**

DNA fragment coding for FlkO with codons optimized for expression in *E. coli* was synthesized by Twist Bioscience, then inserted into NdeI/XhoI site of a modified pET28a(+), which has MBP-coding DNA fragment at the upstream of MCS, to generate expression plasmid pET-MBP-FlkO. The expression plasmid was introduced into *E. coli* BL21 (DE3) to give an expression host.

### **Preparation of recombinant enzymes**

A single colony of *E. coli* host was inoculated into 10 mL of 2xYT media (1.6% Bacto tryptone, 1.0% Bacto yeast extract, 0.5% NaCl) containing 50  $\mu$ g/ml kanamycin and was cultured at 37 °C for overnight as seed culture. 2.0 mL of cultural broth was transferred to 200 mL of 2xYT media containing 50  $\mu$ g/ml kanamycin and cultured at 37 °C for three hours. The broth was cooled on ice and 0.1 mM of isopropyl  $\beta$ -D-thiogalactopyranoside (IPTG) was added to induce the expression of recombinant enzymes. *E. coli* was cultured at 16 °C for overnight. Cells were harvested by centrifugation with 4,000 × *g* for 15 min at 4 °C and washed with wash buffer (20 mM Tris-HCl pH8.0, 150 mM NaCl). Cells were resuspended into lysis buffer (20 mM Tris-HCl pH8.0, 150 mM NaCl, 20 mM imidazole pH8.0), then successively homogenized by sonication. Cell debris were precipitated by centrifugation with 20,630 × *g* for 20 min at 4 °C, then the supernatant was subjected to Ni-NTA His-Bind® resin (Merck Millipore), which was equilibrated by lysis buffer. The column was washed with additional lysis buffer, then eluted with elution buffer (20 mM Tris-HCl pH8.0, 150 mM NaCl, 500 mM imidazole pH8.0). Imidazole was removed by an Amicon Ultra 0.5ml filter (Merck Millipore). The concentrations of proteins were measured using a Bio-Rad protein assay kit (Bio-Rad). From 1 L of *E. coli* culture, 0.8 mg of MBP-FlkO was obtained.

### **In vitro enzymatic reactions**

Enzymatic cyclization was initiated by adding 20  $\mu$ M of FlkO to 50  $\mu$ L of reaction mixtures containing 20 mM Tris-HCl pH8.0 and 50  $\mu$ M substrate peptides. Reaction mixtures were incubated at 30 °C for 12 hours. Reaction mixtures were quenched by the addition of equal volume of 0.1% TFA, then centrifuged at 20,630 × *g* for 10 min. Resultant supernatants were subjected to HPLC analysis. Column elutes were monitored by UV absorption at 210 nm. The analytical conditions are listed in Table S1. Conversions (%) were calculated based on the area value of the cyclic products in the “+ FlkO” samples compared to the area value of the substrates in the “substrate standard” samples. The

---

“substrate standard” samples were prepared using an identical procedure to the “+ FlkO” sample, but without the addition of enzyme and incubation.

### **Kinetic analysis**

To determine the kinetic parameters of MBP-FlkO against **2**, 50  $\mu\text{L}$  of reaction buffer containing 20 mM Tris-HCl (pH 8.0), 20  $\mu\text{M}$  MBP-FlkO and 3.125–100  $\mu\text{M}$  of **2** were incubated at 30  $^{\circ}\text{C}$  for 30 min. The reaction was quenched by adding 50  $\mu\text{L}$  0.1% TFA and centrifuged with  $20,630 \times g$  for 10 min at 4  $^{\circ}\text{C}$ . 15  $\mu\text{L}$  of supernatant was subjected to HPLC operated in condition A (Table S1). The concentrations of cyclic peptide **1** were estimated using the experimentally determined extinction coefficient ( $\epsilon$  210) of **2**, assuming equal  $\epsilon$  210 values for both compounds. All reaction was carried out in triplicates. Kinetic parameters were estimated from the initial velocities using Michaelis-Menten equation and curve-fitting program Kaleidagraph.

**Table S1.** Conditions of HPLC analysis.

| Condition | Description                                                                                                                                                                                                                           |
|-----------|---------------------------------------------------------------------------------------------------------------------------------------------------------------------------------------------------------------------------------------|
| A         | Column: COSMOSIL 5C <sub>18</sub> -MS-II 4.6 mm I.D. × 250 mm<br>Mobile phases: A) H <sub>2</sub> O + 0.05% TFA, B) MeOH + 0.05% TFA<br><b>Gradient: 40–70% for B in 30 min</b><br>Flow rate: 1.0 mL/min<br>Injection volume: 15 µL   |
| B         | Column: COSMOSIL 5C <sub>18</sub> -MS-II 4.6 mm I.D. × 250 mm<br>Mobile phases: A) H <sub>2</sub> O + 0.05% TFA, B) MeOH + 0.05% TFA<br><b>Gradient: 20–50% for B in 30 min</b><br>Flow rate: 1.0 mL/min<br>Injection volume: 15 µL   |
| C         | Column: COSMOSIL 5C <sub>18</sub> -MS-II 4.6 mm I.D. × 250 mm<br>Mobile phases: A) H <sub>2</sub> O + 0.05% TFA, B) MeOH + 0.05% TFA<br><b>Gradient: 10–40% for B in 30 min</b><br>Flow rate: 1.0 mL/min<br>Injection volume: 15 µL   |
| D         | Column: COSMOSIL 2.5C <sub>18</sub> -MS-II 2.0 mm I.D. × 100 mm<br>Mobile phases: A) H <sub>2</sub> O + 0.05% TFA, B) MeOH + 0.05% TFA<br><b>Gradient: 10–100% for B in 20 min</b><br>Flow rate: 0.3 mL/min<br>Injection volume: 2 µL |



## Supplementary Figures

**a.**

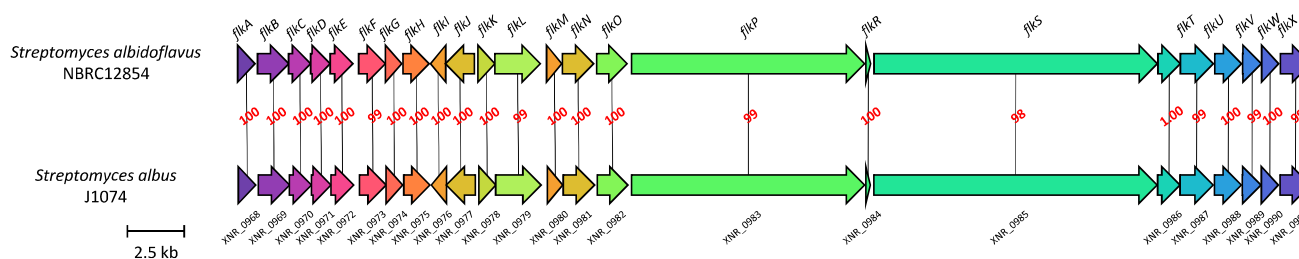

**b.**

| Gene        | Protein ID | Description                                          |
|-------------|------------|------------------------------------------------------|
| <i>flkA</i> | BFM22936.1 | DeoR/GlpR family DNA-binding transcription regulator |
| <i>flkB</i> | BFM22937.1 | sugar ABC transporter substrate-binding protein      |
| <i>flkC</i> | BFM22938.1 | sugar ABC transporter permease                       |
| <i>flkD</i> | BFM22939.1 | carbohydrate ABC transporter permease                |
| <i>flkE</i> | BFM22940.1 | zinc-dependent alcohol dehydrogenase family protein  |
| <i>flkF</i> | BFM22941.1 | glycosyltransferase 87 family protein                |
| <i>flkG</i> | BFM22942.1 | FkbM family methyltransferase                        |
| <i>flkH</i> | BFM22943.1 | glycosyltransferase family 4 protein                 |
| <i>flkI</i> | BFM22944.1 | response regulator transcription factor              |
| <i>flkJ</i> | BFM22945.1 | sensor histidine kinase                              |
| <i>flkK</i> | BFM22946.1 | ABC transporter ATP-binding protein                  |
| <i>flkL</i> | BFM22947.1 | hypothetical protein                                 |
| <i>flkM</i> | BFM22948.1 | response regulator transcription factor              |
| <i>flkN</i> | BFM22949.1 | hypothetical protein                                 |
| <i>flkO</i> | BFM22950.1 | serine hydrolase domain-containing protein           |
| <i>flkP</i> | BFM22951.1 | NRPS                                                 |
| <i>flkR</i> | BFM22952.1 | MbtH family protein                                  |
| <i>flkS</i> | BFM22953.1 | NRPS                                                 |
| <i>flkT</i> | BFM22954.1 | clavaminic synthase family protein                   |
| <i>flkU</i> | BFM22955.1 | MFS transporter                                      |
| <i>flkV</i> | BFM22956.1 | cytochrome P450                                      |
| <i>flkW</i> | BFM22957.1 | hypothetical protein                                 |
| <i>flkX</i> | BFM22958.1 | alpha/beta fold hydrolase                            |

**Figure S1.** Cyclofaulknamicin BGC (*flk*) in *S. albidoflavus* NBRC12854. **a.** Comparison of *flk* in strain NBRC12854 and J1074 (BGC0002358 in MIBiG database<sup>2</sup>). Locus tags are described for *flk* in J1074. Homologous genes are linked, and amino acid sequence identities (%) were described in red letters. Figure was generated by clinker.<sup>3</sup> **b.** Functional annotation and Protein Ids of *flk* genes in NBRC12854 strain. Genes detection and annotation was performed by dfast.<sup>4</sup> Sequence data of *flk* in *S. albidoflavus* NBRC12854 was deposited under following ID: LC816587

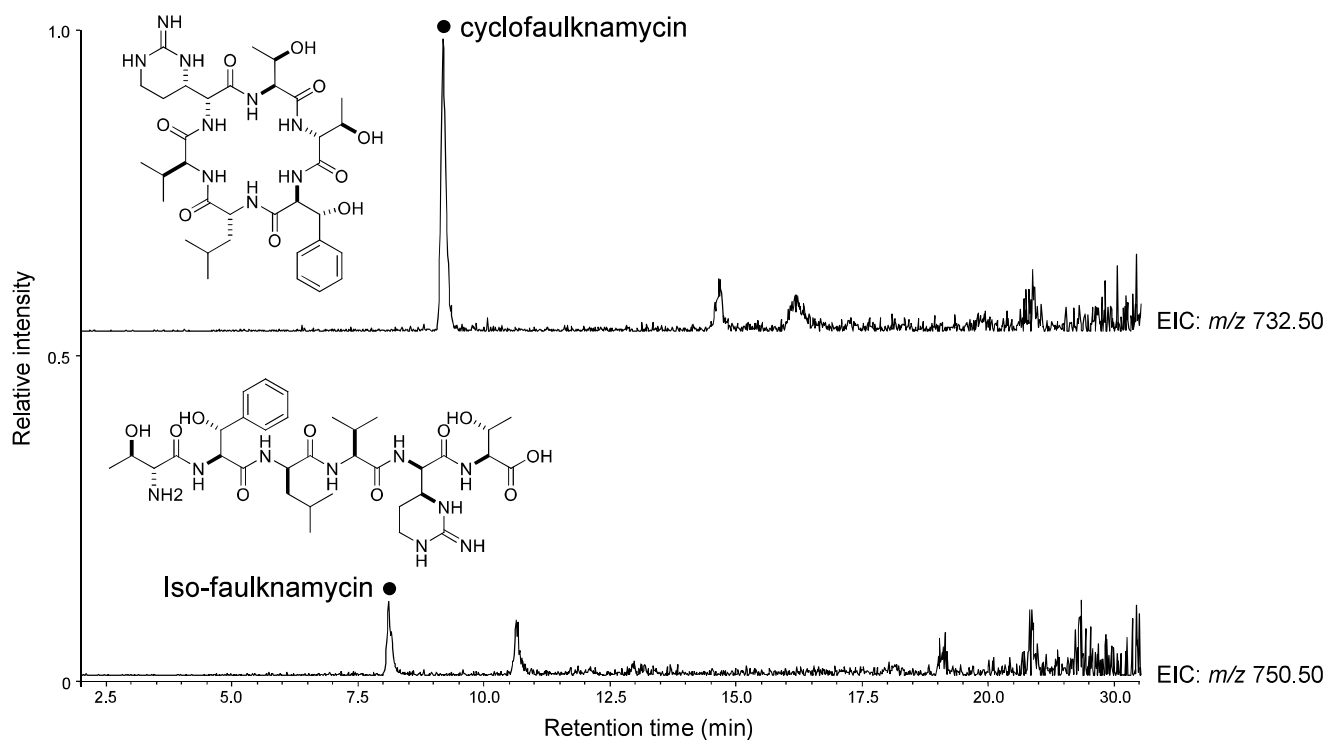

**Figure S2.** Production of cyclofaulknamycin and iso-faulknamycin by *S. albidoflavus* NBRC12854.

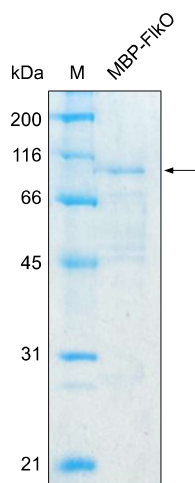

**Figure S3.** SDS-PAGE of MBP-FIkO. MBP-FIkO was obtained in approximately more than 90% purity. Theoretical molecular weight of MBP-FIkO is 93 kDa.

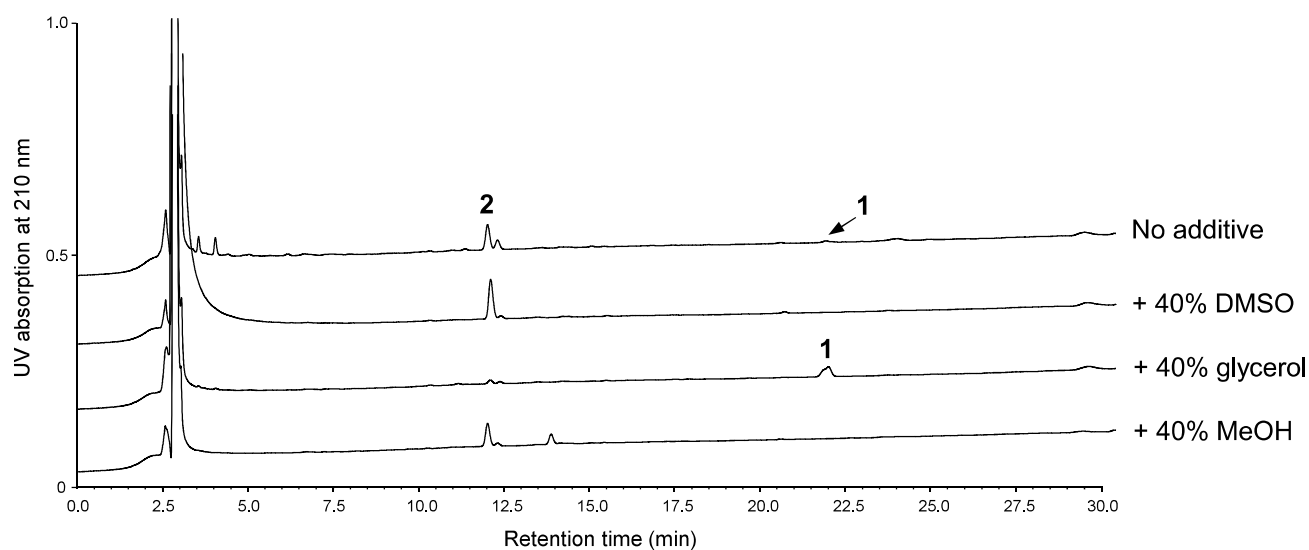

**Figure S4.** Effect of cosolvent in enzymatic reaction of FlkO. Samples were analyzed by HPLC condition A in Table S1. 50  $\mu\text{M}$  of **2** was incubated with 20  $\mu\text{M}$  of MBP-FlkO for 12 hours in the presence of 40% co-solvent; DMSO, glycerol, and MeOH. Amount of **1** was markedly enhanced by the addition of 40% glycerol.

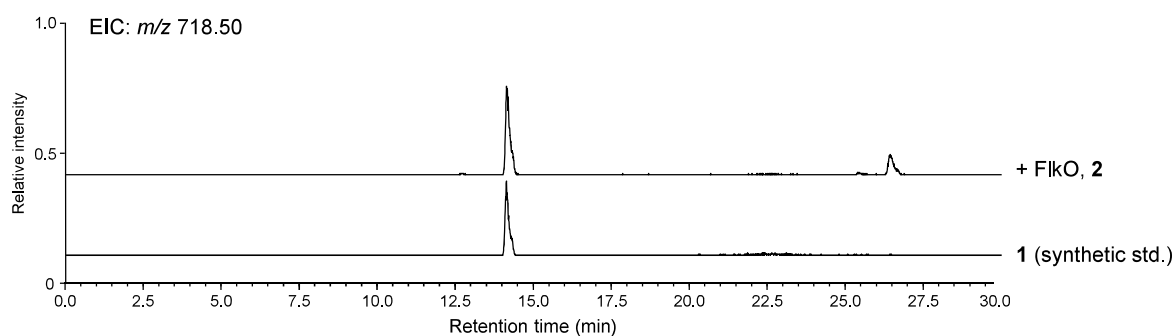

**Figure S5.** LC comparison of FlkO enzymatic reaction product and synthetic **1**. Samples were analyzed by LCMS2050 (Shimadzu) equipped with HPLC system. Samples were separated with reversed phase column (COSMOSIL 2.5C<sub>18</sub>-MS-II 2.0 mm I.D.  $\times$  100 mm), using H<sub>2</sub>O/MeOH + 0.05%TFA as mobile phases A and B. Column was eluted with gradient mode from 10-100% for mobile phase B in 20 min, with flow rate at 0.3 mL/min.

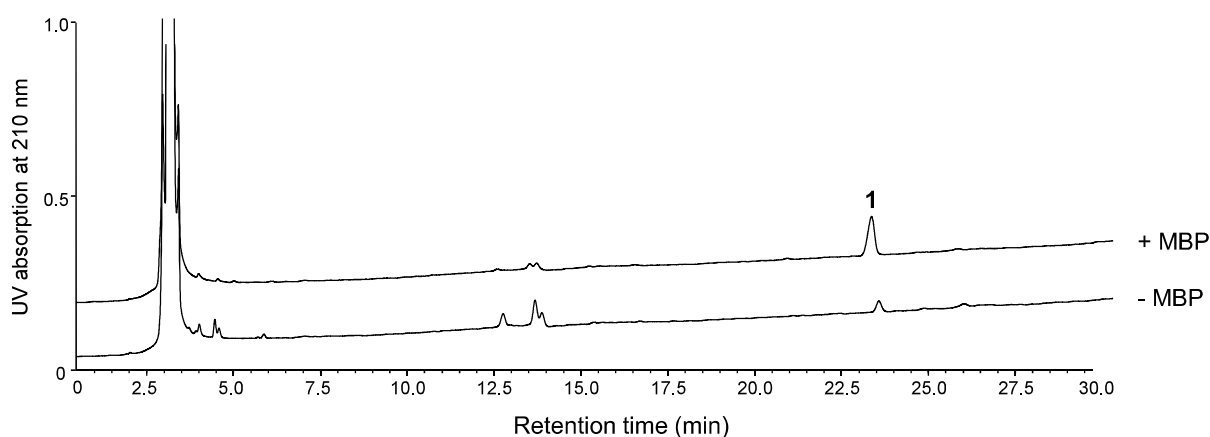

**Figure S6.** Effect of MBP-tag removal. Samples were analyzed by HPLC condition A in Table S1. **2** was incubated under the optimized reaction condition (incubation for 12 hours in the presence of 40% glycerol) with MBP-fused FlkO (+ MBP) and FlkO with the MBP tag removed (– MBP).

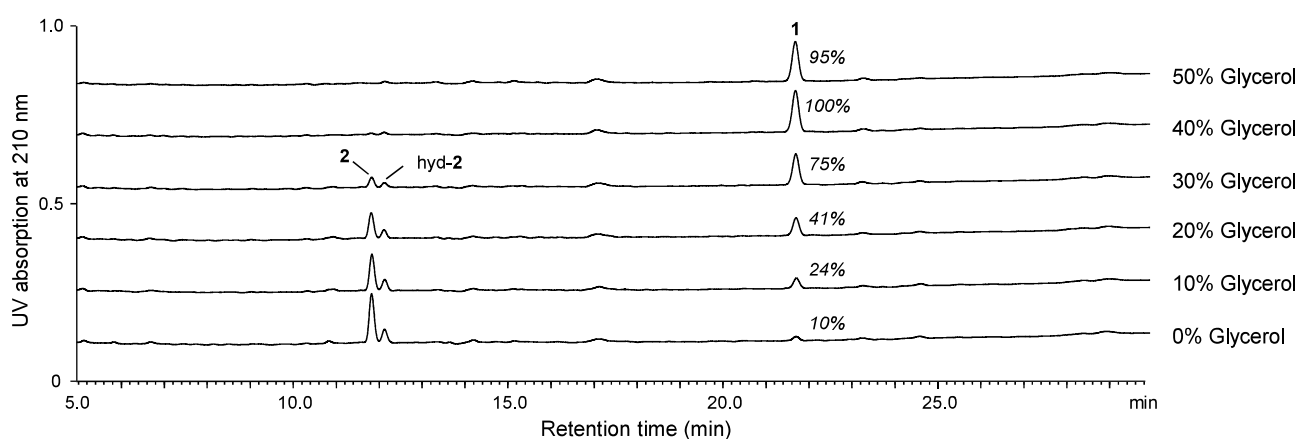

**Figure S7.** Effect of glycerol concentration on FlkO-mediated cyclization. Compound **2** (50  $\mu$ M) was cyclized by 40 mol% of FlkO under glycerol content ranging from 10% to 50%. Reaction mixtures were incubated at 30°C for 12 hours. The area value of **1** relative to that in the 40% glycerol sample was described alongside the peaks.

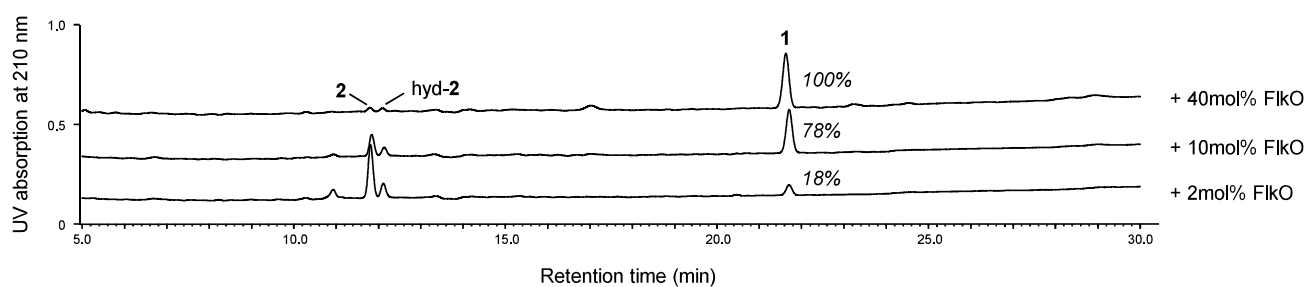

**Figure S8.** Substrate-enzyme concentration ratio. The cyclization reaction was performed with varying enzyme concentrations ranging from 2  $\mu\text{M}$ –40  $\mu\text{M}$  in the presence of 40% glycerol and 50  $\mu\text{M}$  substrate. Reaction mixtures were incubated at 30 $^{\circ}\text{C}$  for 12 hours. The area value of **1** relative to that in the 40 mol% FlkO sample was described alongside the peaks.

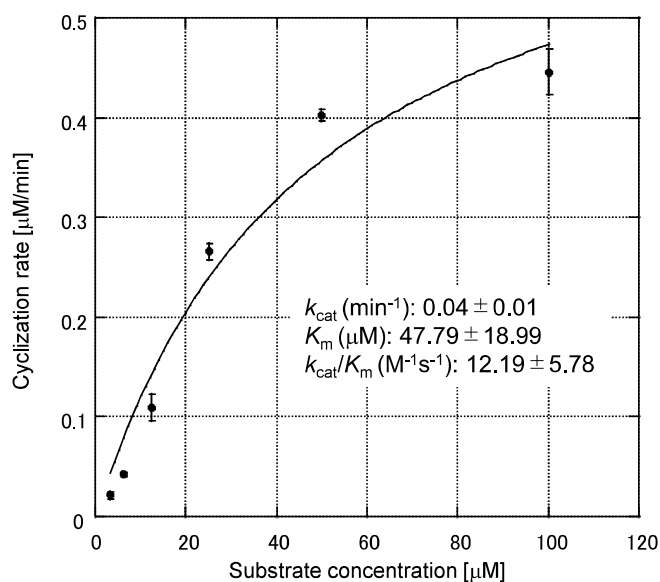

**Figure S9.** Michaelis-Menten plots of MBP-FlkO with **2** as a substrate. The plot is means of triplicate experiments.

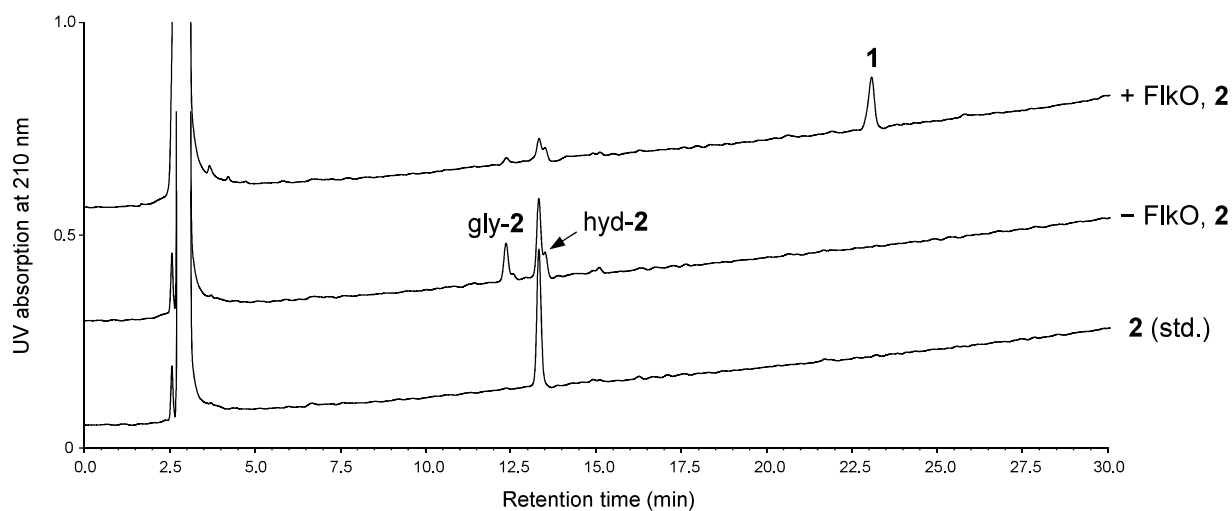

**Figure S10.** *In vitro* enzymatic reaction of FlkO using variant substrates **2**. Samples were analyzed by HPLC condition A in Table S1. This figure is the extended version of Figure 2. gly-**2**: glycerolysate of **2** (Fig. S39), hyd-**2**: hydrolysate of **2** (Fig. S40).

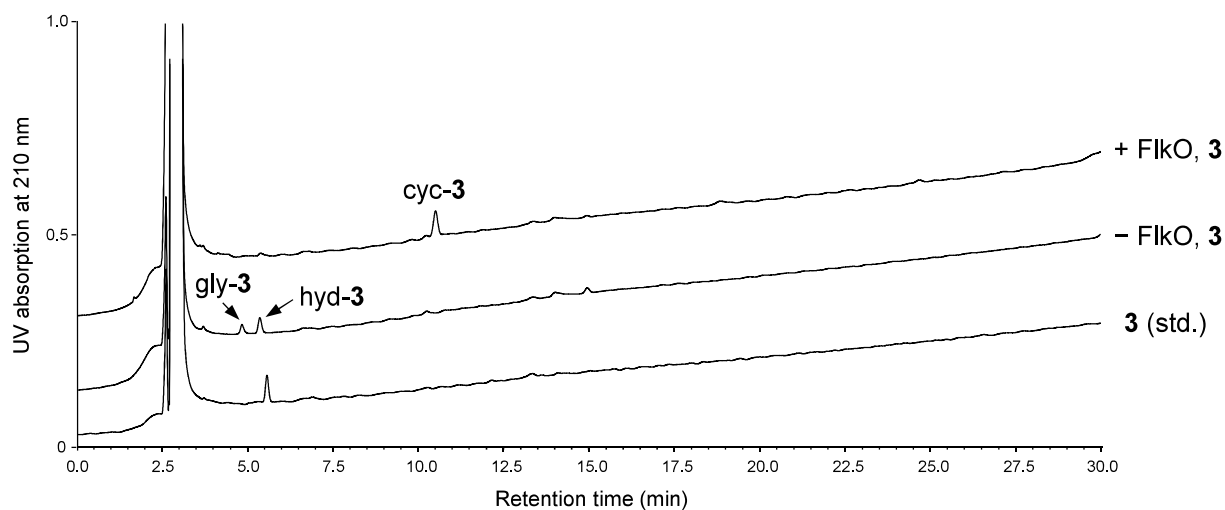

**Figure S11.** *In vitro* enzymatic reaction of FlkO using variant substrates **3**. Samples were analyzed by HPLC condition A in Table S1.

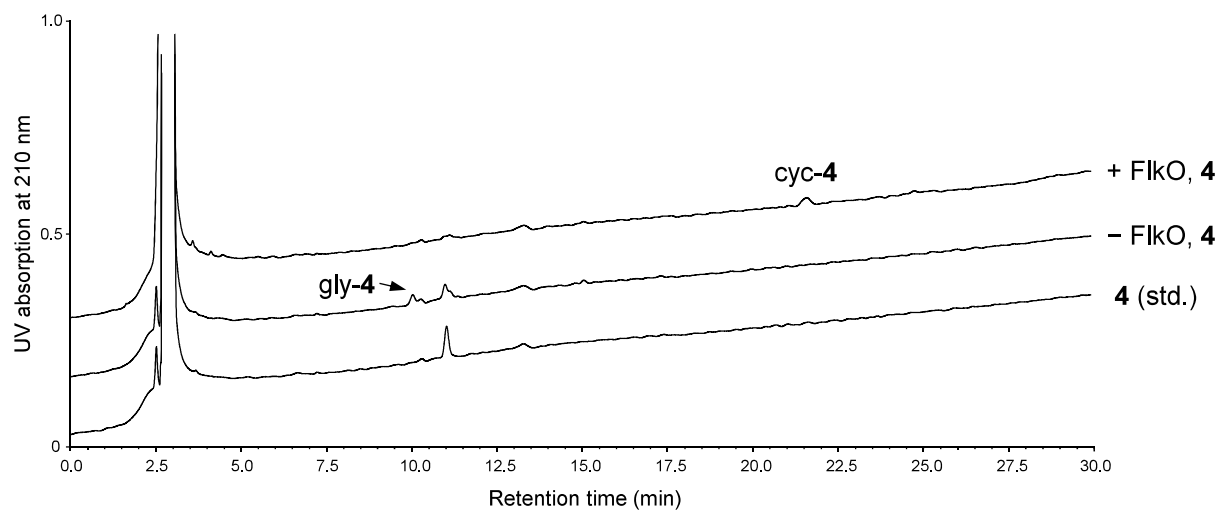

**Figure S12.** *In vitro* enzymatic reaction of FlkO using variant substrates **4**. Samples were analyzed by HPLC condition A in Table S1.

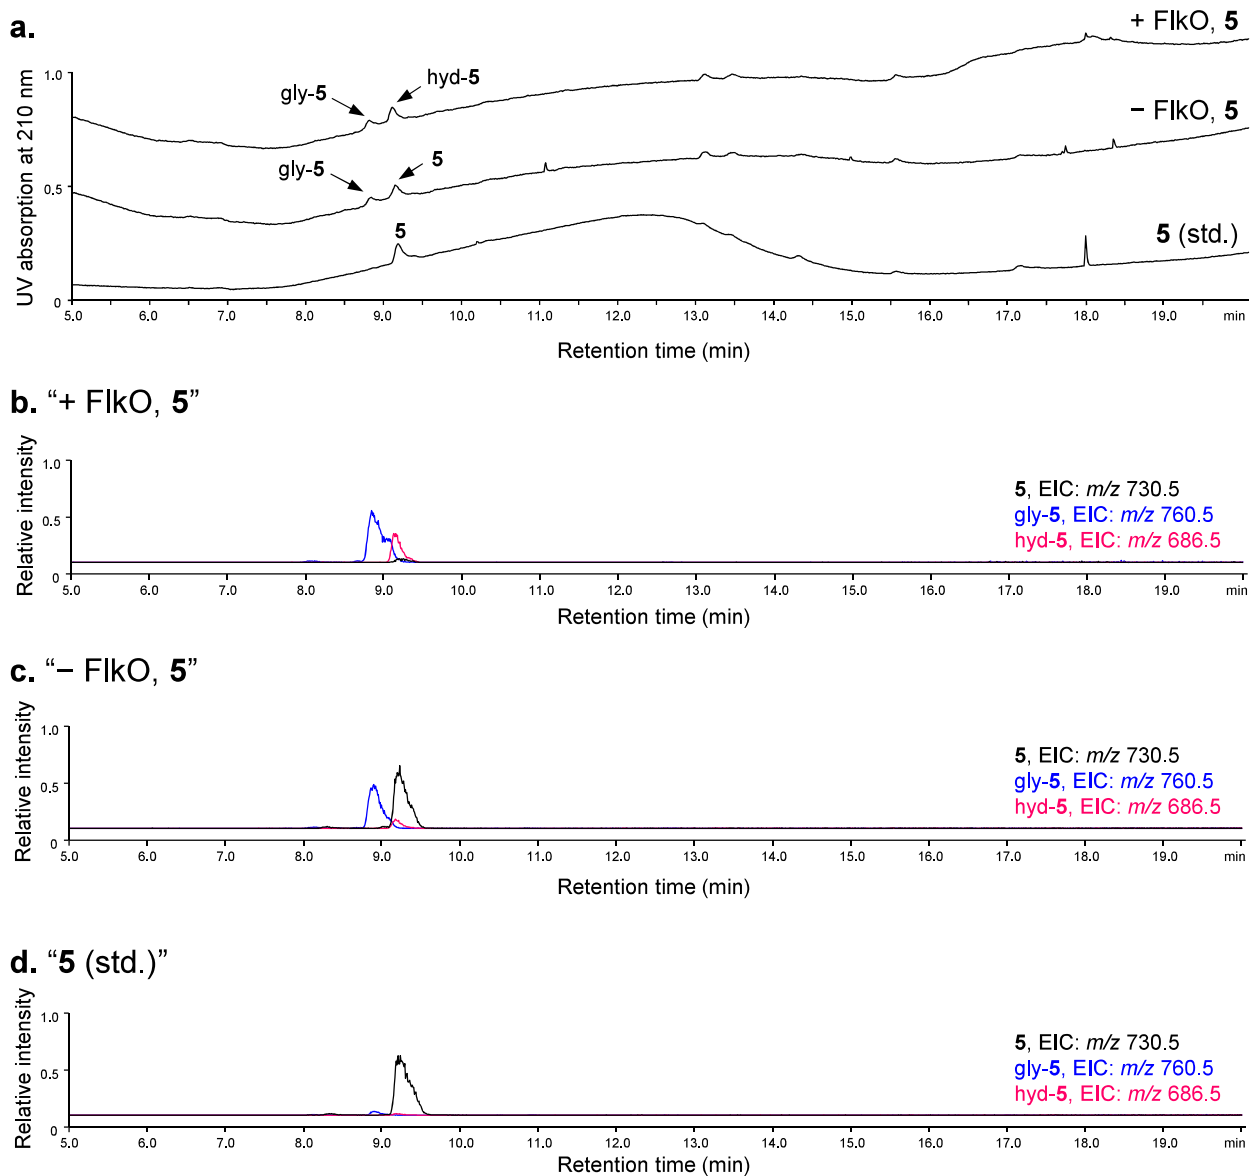

**Figure S13.** LC-MS analysis of *in vitro* enzymatic reaction of FlkO with variant substrates **5**. **a.** LC-UV chromatograms with absorption at 210 nm. Samples were analyzed by HPLC condition D in Table S1. **b-d.** Extracted ion chromatograms of **5** (black), glycerolysate of **5** (gly-**5**, blue), and hydrolysate of **5** (hyd-**5**, red). The result indicate that FlkO facilitates the hydrolysis of **5**.



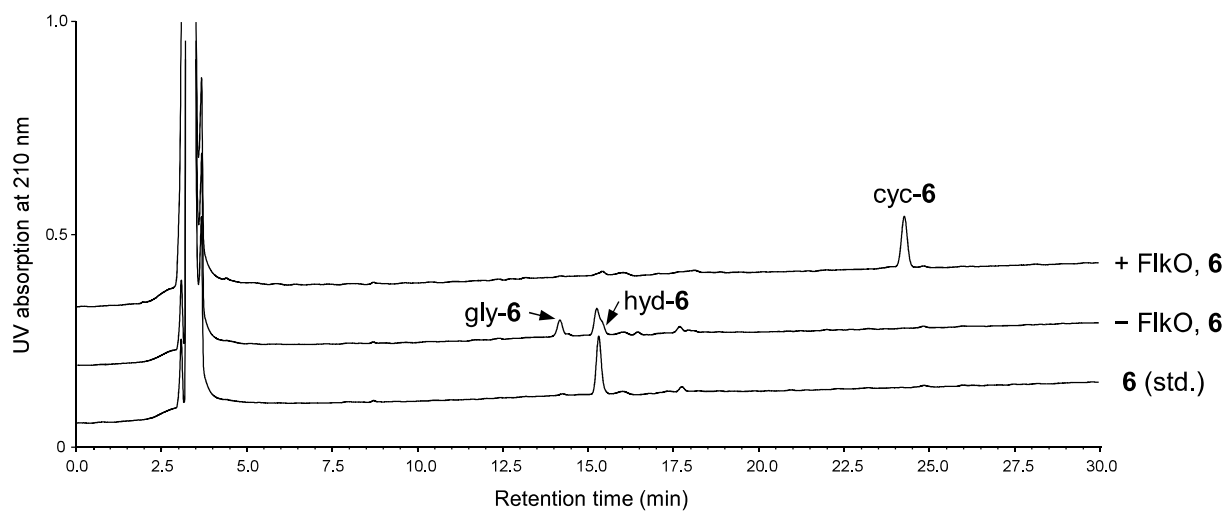

**Figure S14.** *In vitro* enzymatic reaction of FlkO using variant substrates **6**. Samples were analyzed by HPLC condition A in Table S1.

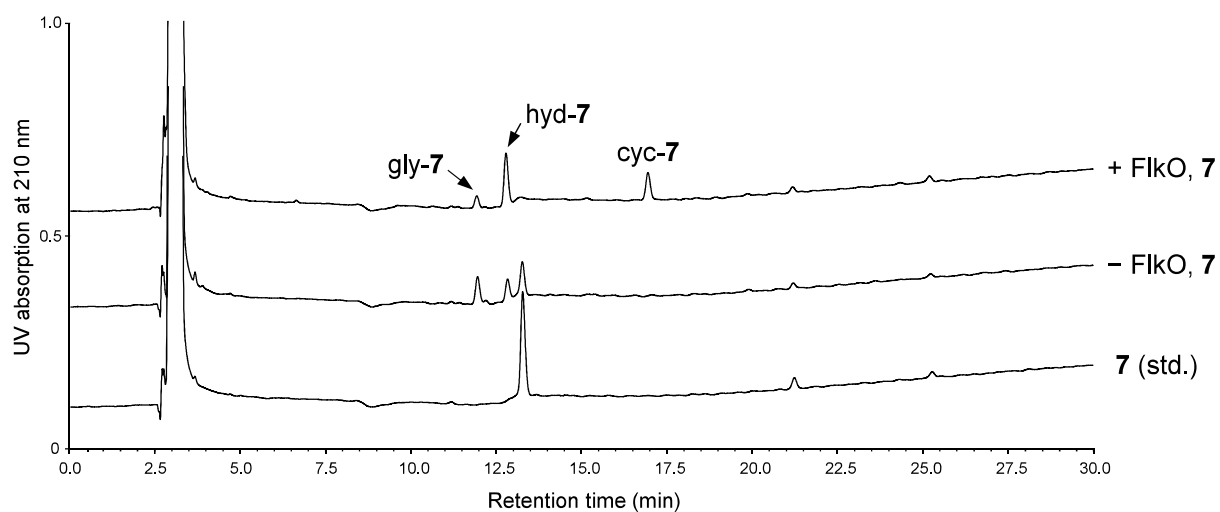

**Figure S15.** *In vitro* enzymatic reaction of FlkO using variant substrates **7**. Samples were analyzed by HPLC condition B in Table S1.

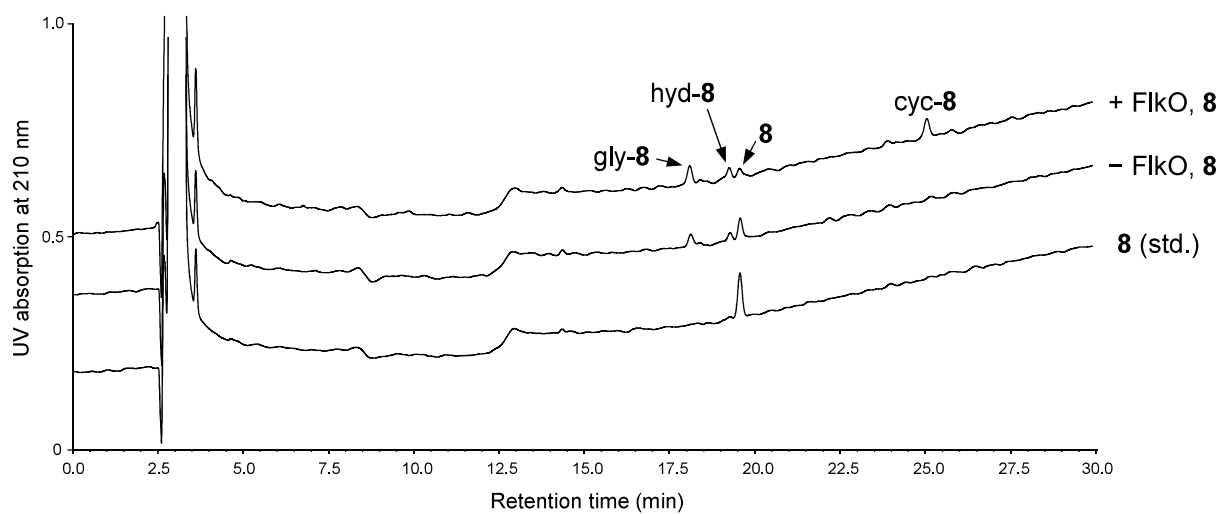

**Figure S16.** *In vitro* enzymatic reaction of FlkO using variant substrates **8**. Samples were analyzed by HPLC condition B in Table S1.

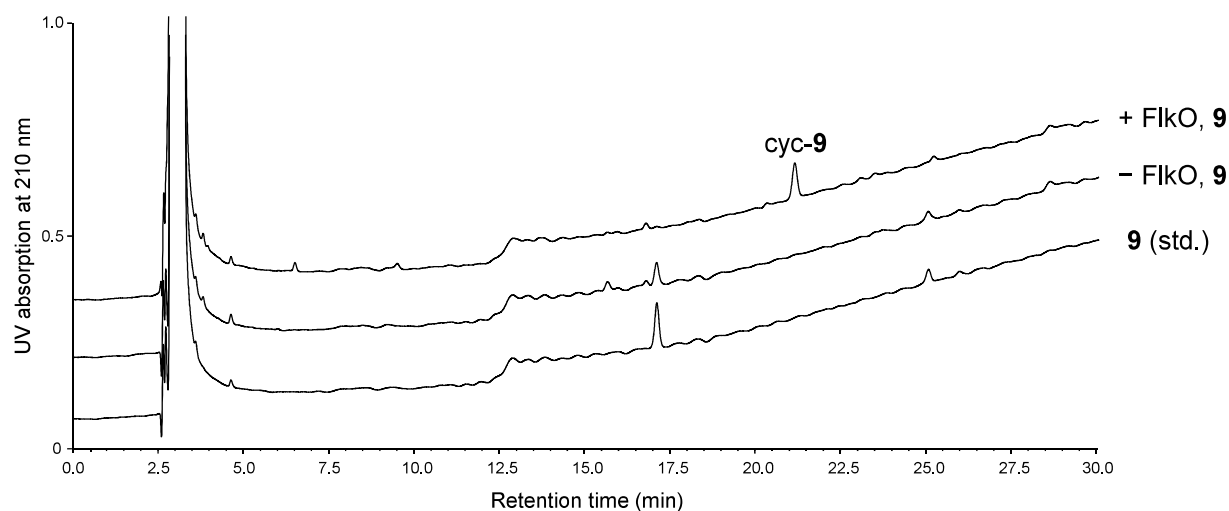

**Figure S17.** *In vitro* enzymatic reaction of FlkO using variant substrates **9**. Samples were analyzed by HPLC condition B in Table S1.

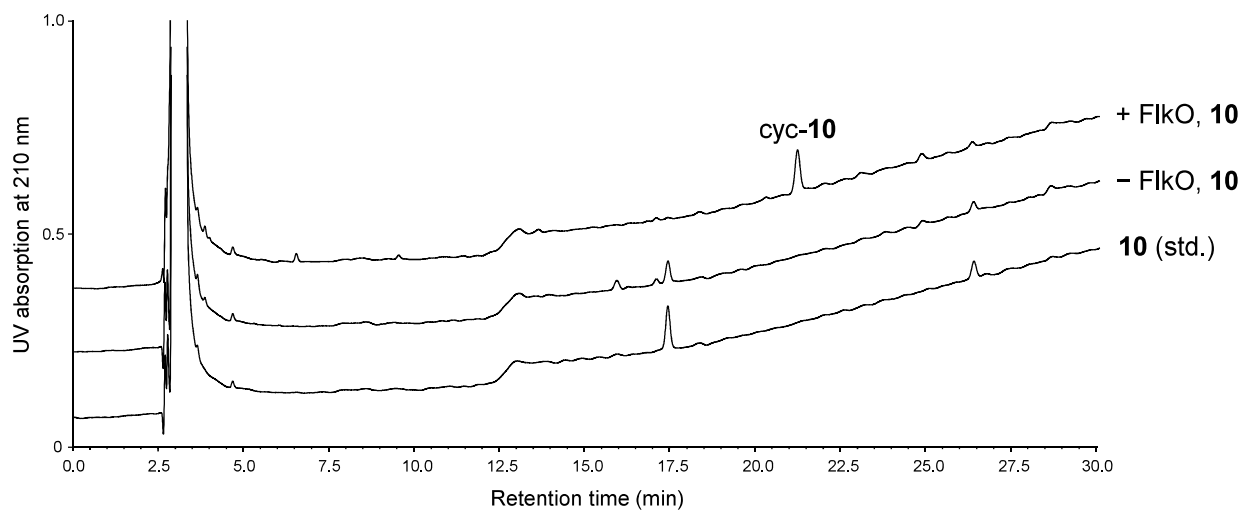

**Figure S18.** *In vitro* enzymatic reaction of FlkO using variant substrates **10**. Samples were analyzed by HPLC condition B in Table S1.

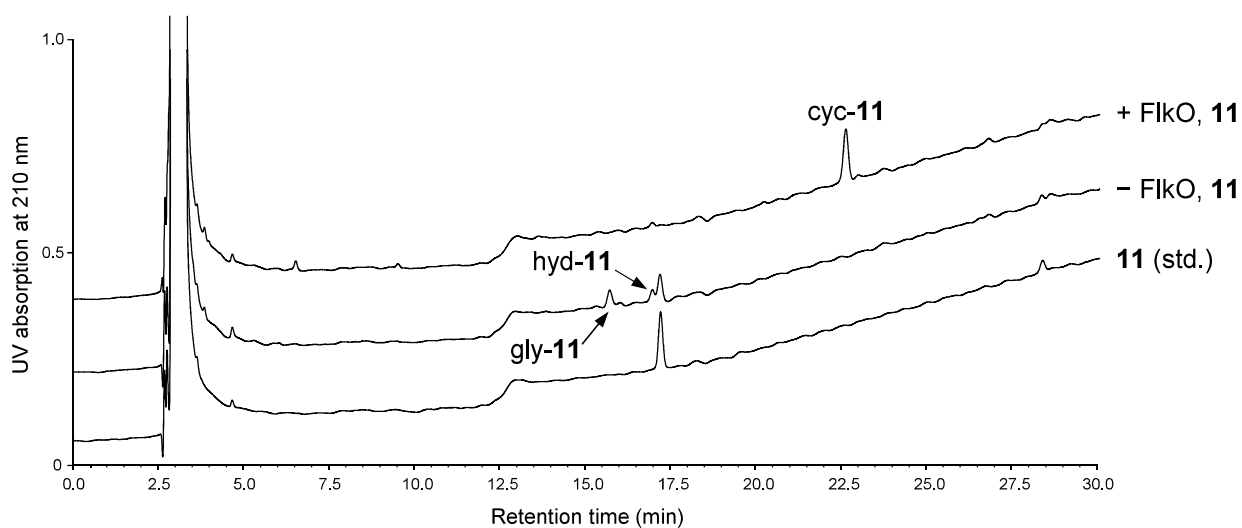

**Figure S19.** *In vitro* enzymatic reaction of FlkO using variant substrates **11**. Samples were analyzed by HPLC condition B in Table S1.

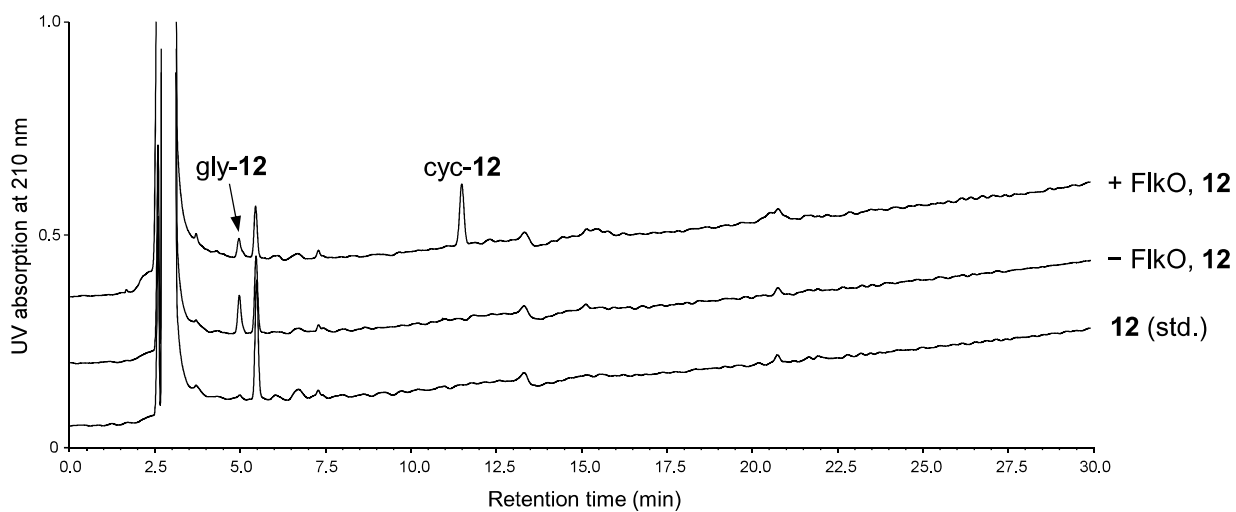

**Figure S20.** *In vitro* enzymatic reaction of FlkO using variant substrates **12**. Samples were analyzed by HPLC condition A in Table S1.

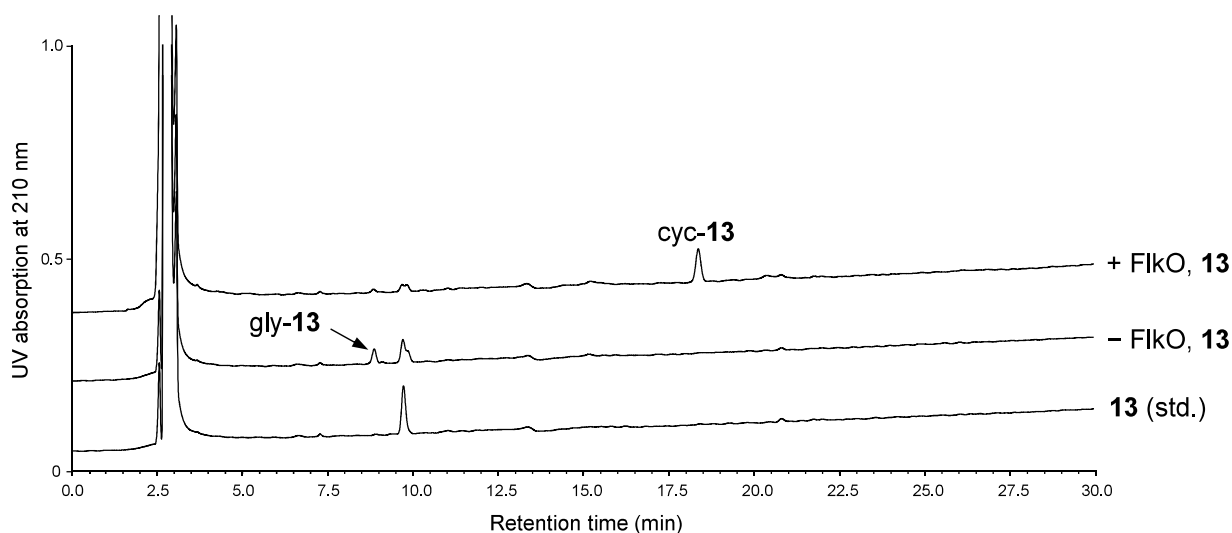

**Figure S21.** *In vitro* enzymatic reaction of FlkO using variant substrates **13**. Samples were analyzed by HPLC condition A in Table S1.

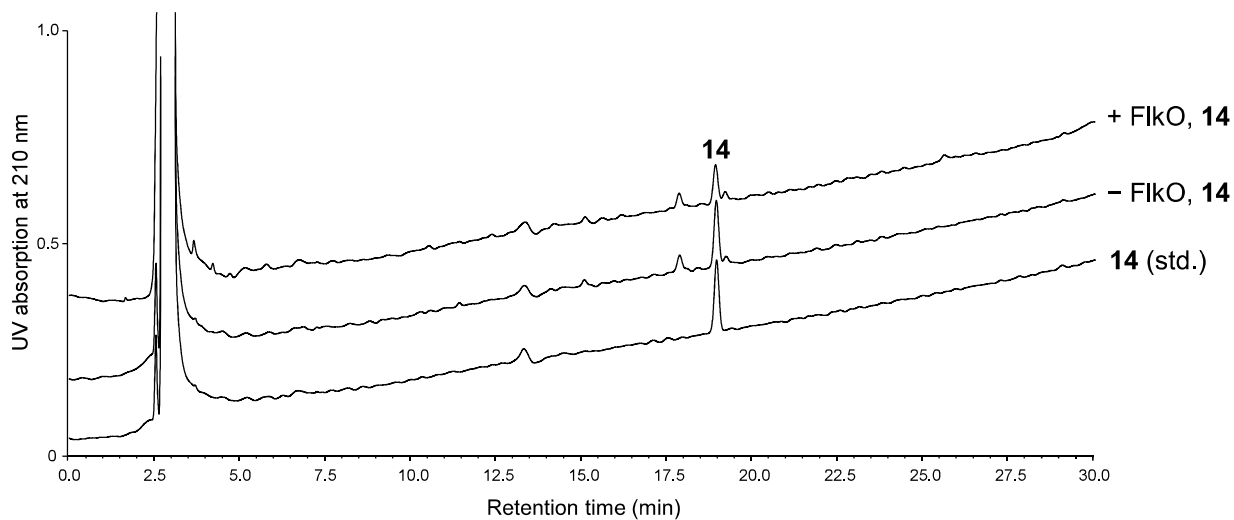

**Figure S22.** *In vitro* enzymatic reaction of FlkO using variant substrates **14**. Samples were analyzed by HPLC condition A in Table S1.

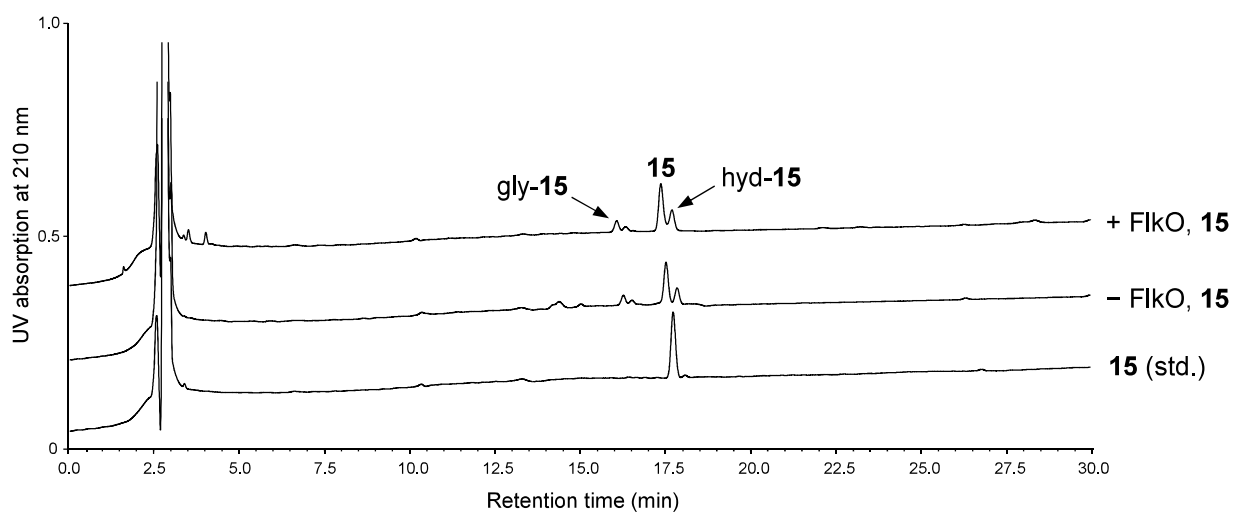

**Figure S23.** *In vitro* enzymatic reaction of FlkO using variant substrates **15**. Samples were analyzed by HPLC condition A in Table S1.

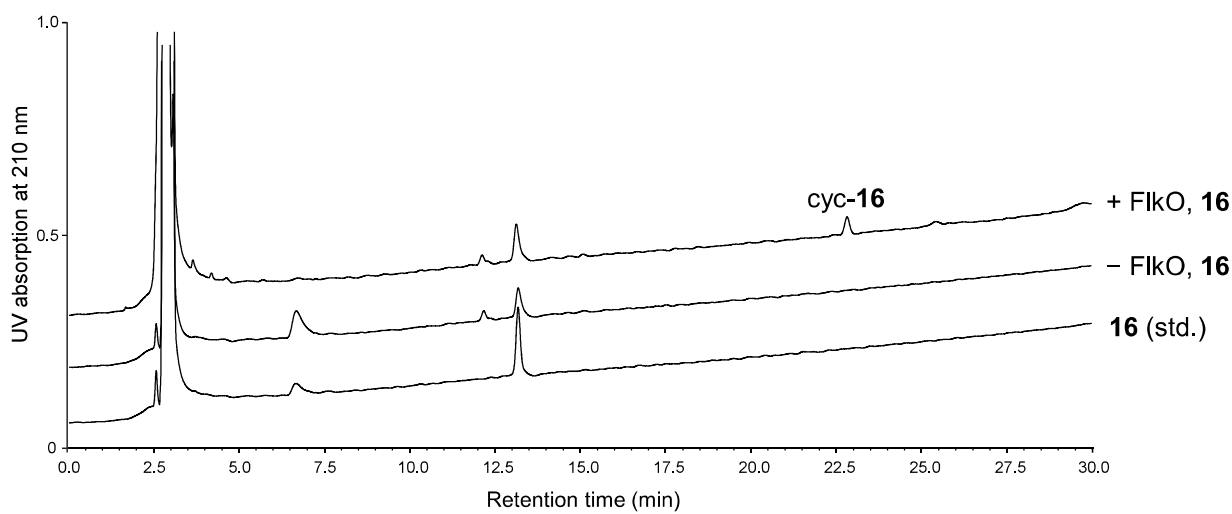

**Figure S24.** *In vitro* enzymatic reaction of FlkO using variant substrates **16**. Samples were analyzed by HPLC condition A in Table S1.

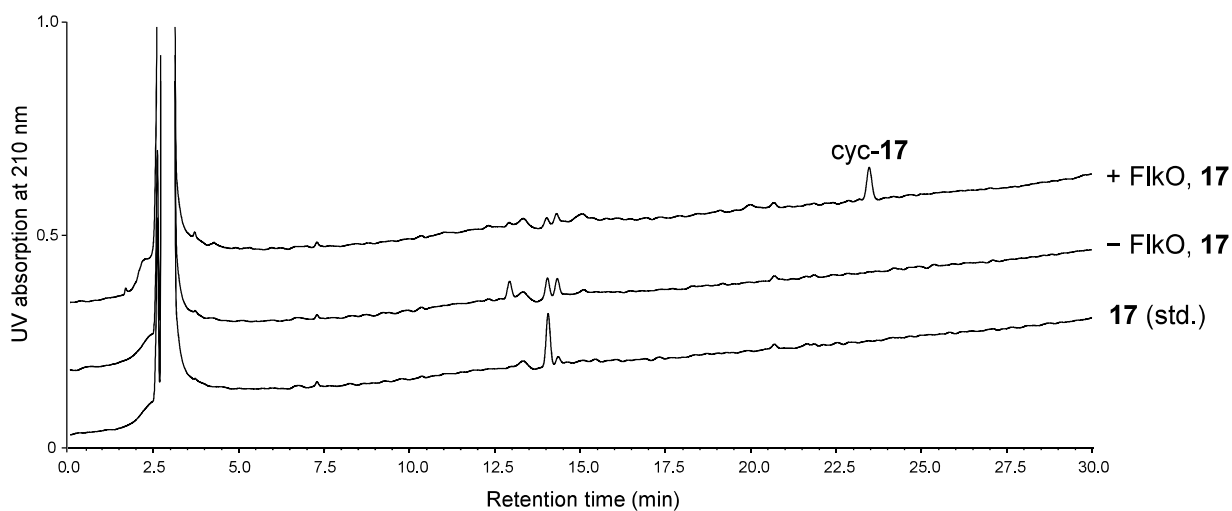

**Figure S25.** *In vitro* enzymatic reaction of FlkO using variant substrates **17**. Samples were analyzed by HPLC condition A in Table S1.

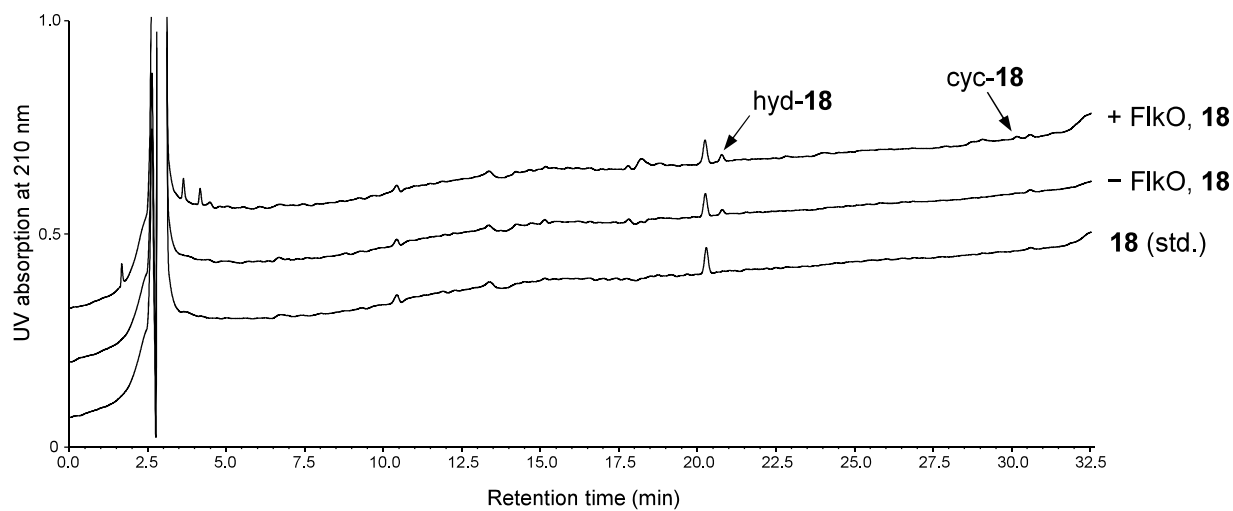

**Figure S26.** *In vitro* enzymatic reaction of FlkO using variant substrates **18**. Samples were analyzed by HPLC condition A in Table S1.

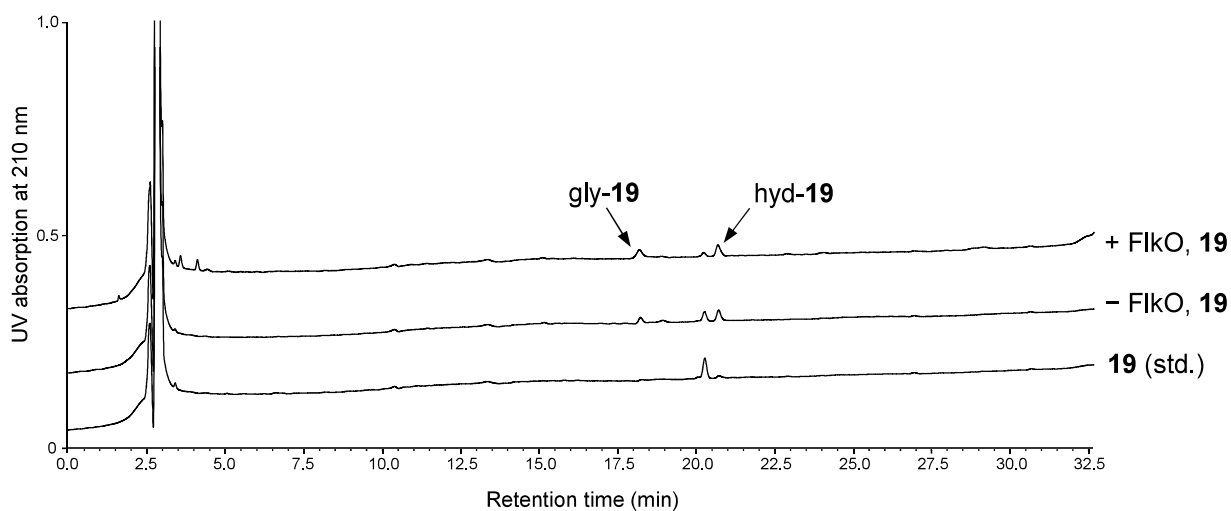

**Figure S27.** *In vitro* enzymatic reaction of FlkO using variant substrates **19**. Samples were analyzed by HPLC condition A in Table S1.

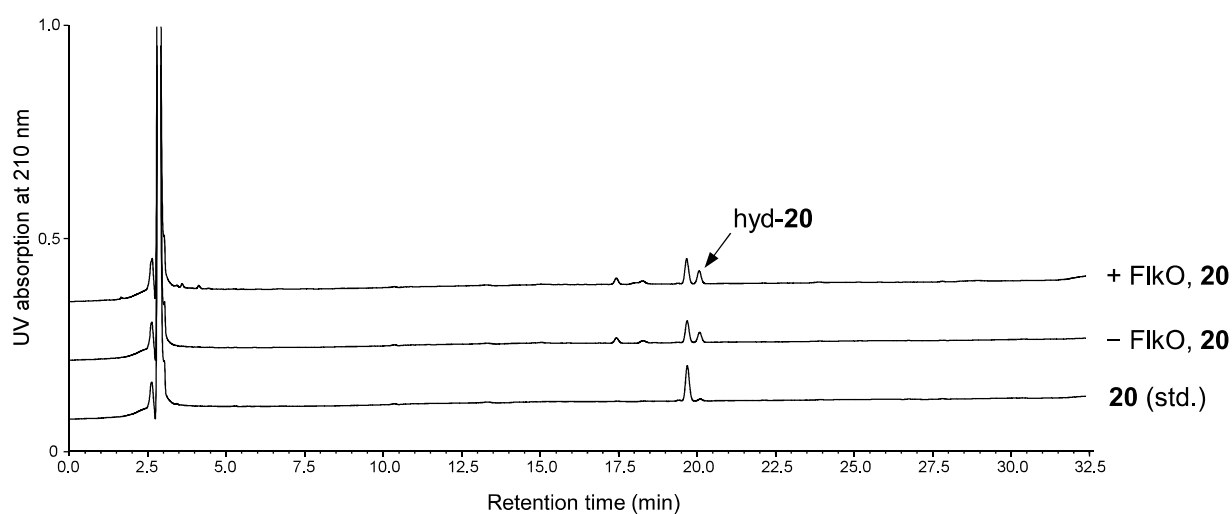

**Figure S28.** *In vitro* enzymatic reaction of FlkO using variant substrates **20**. Samples were analyzed by HPLC condition A in Table S1.

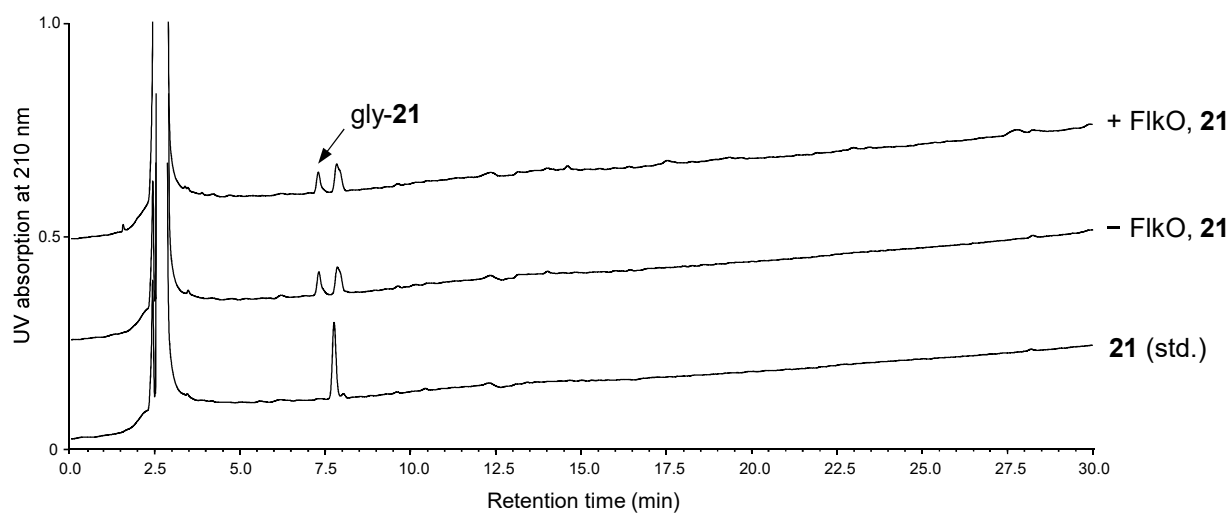

**Figure S29.** *In vitro* enzymatic reaction of FlkO using variant substrates **21**. Samples were analyzed by HPLC condition A in Table S1.



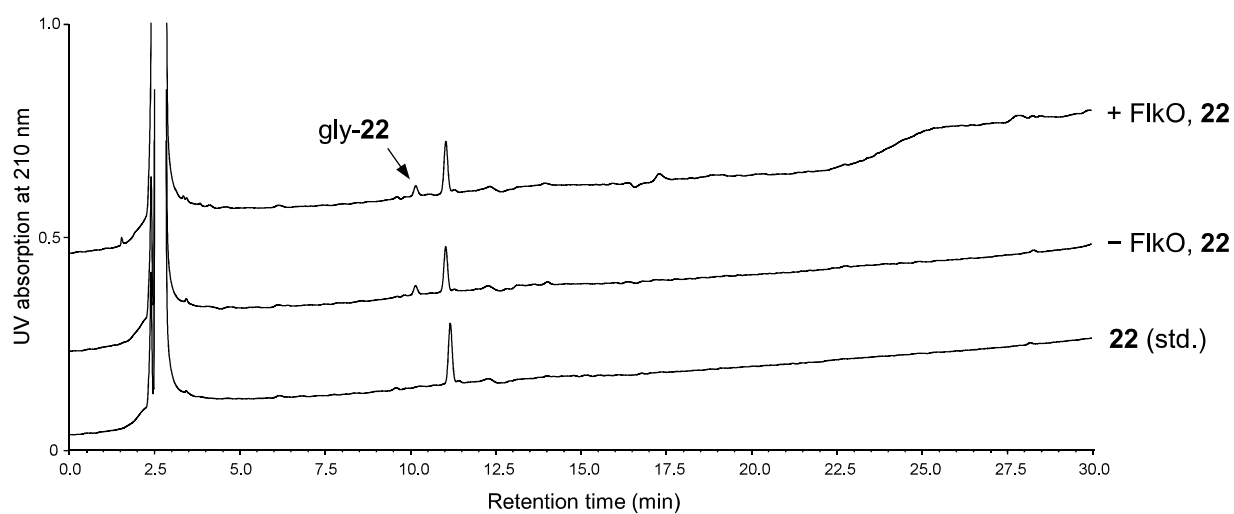

**Figure S30.** *In vitro* enzymatic reaction of FlkO using variant substrates **22**. Samples were analyzed by HPLC condition A in Table S1.

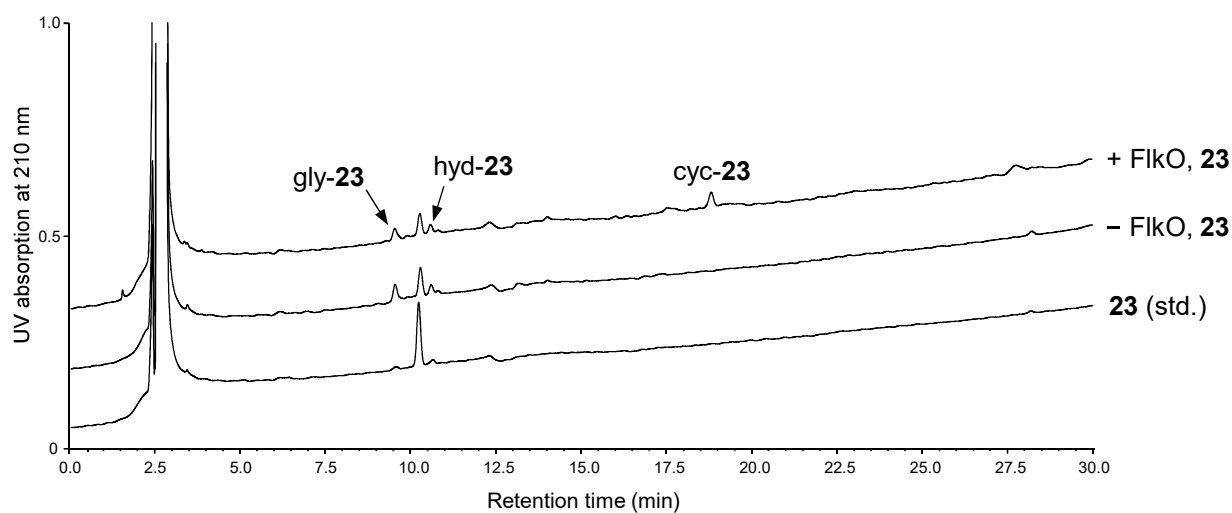

**Figure S31.** *In vitro* enzymatic reaction of FlkO using variant substrates **23**. Samples were analyzed by HPLC condition A in Table S1.

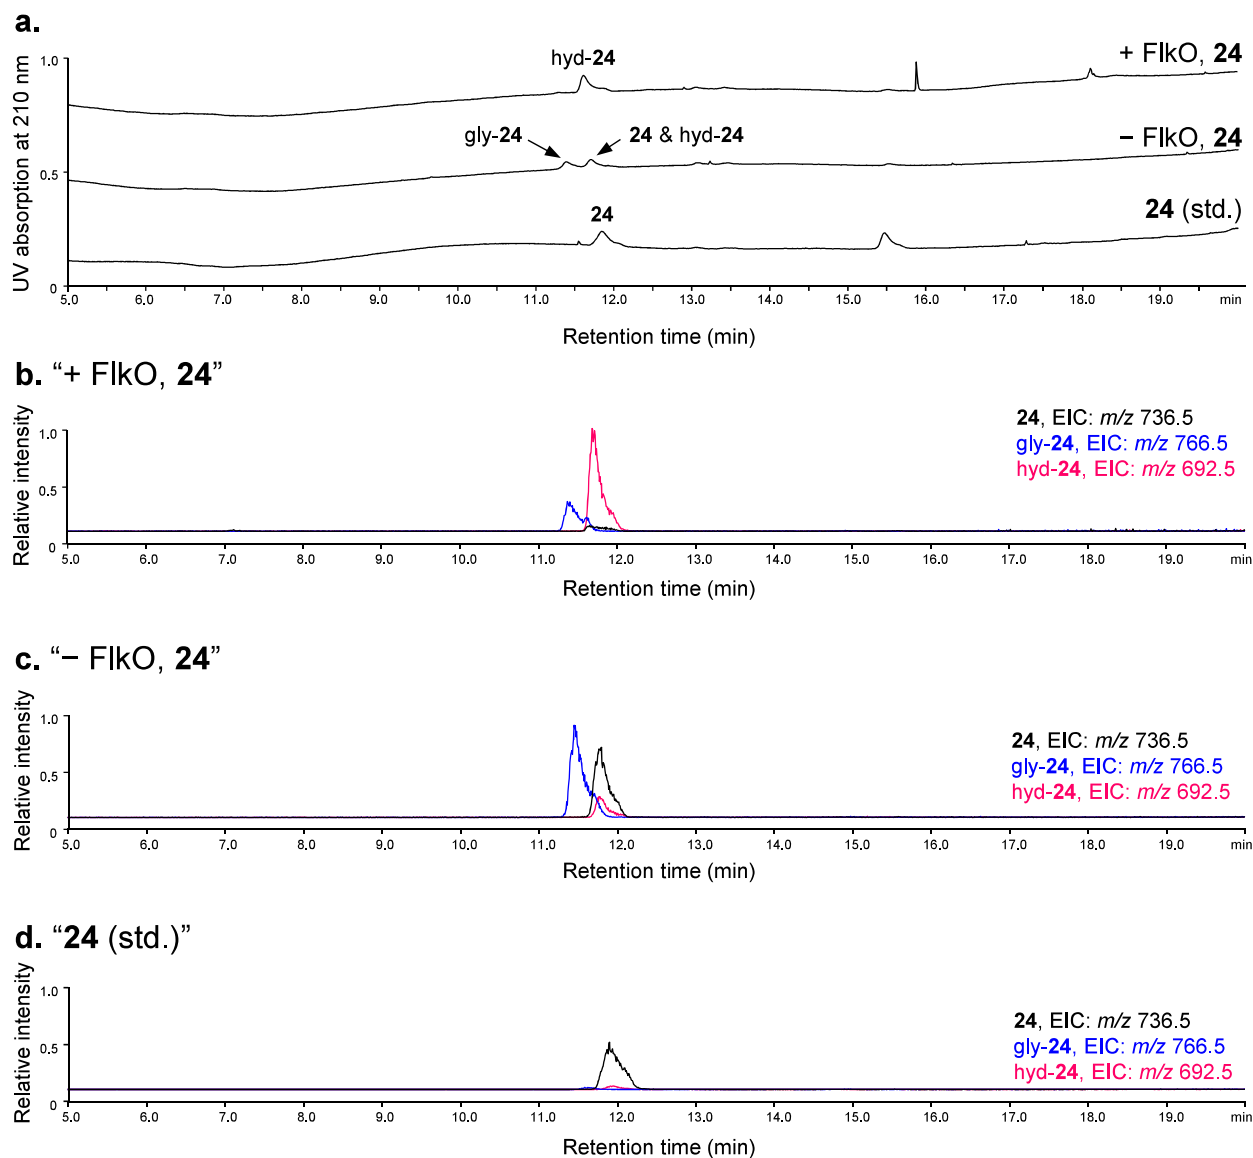

**Figure S32.** LC-MS analysis of *in vitro* enzymatic reaction of FlkO with variant substrates **24**. **a.** LC-UV chromatograms with absorption at 210 nm. Samples were analyzed by HPLC condition D in Table S1. **b-d.** Extracted ion chromatograms of **24** (black), glycerolysate of **24** (gly-**24**, blue), and hydrolysate of **24** (hyd-**24**, red). The result indicate that FlkO facilitates the hydrolysis of **24**.

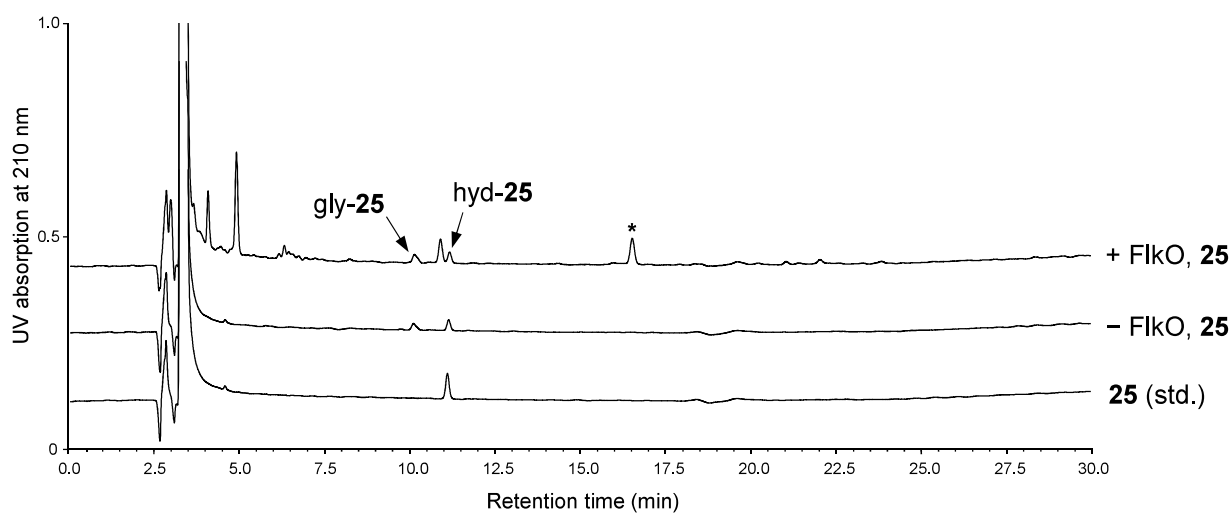

**Figure S33.** *In vitro* enzymatic reaction of FlkO using variant substrates **25**. Samples were analyzed by HPLC condition C in Table S1. \*Impurity from enzyme solution.

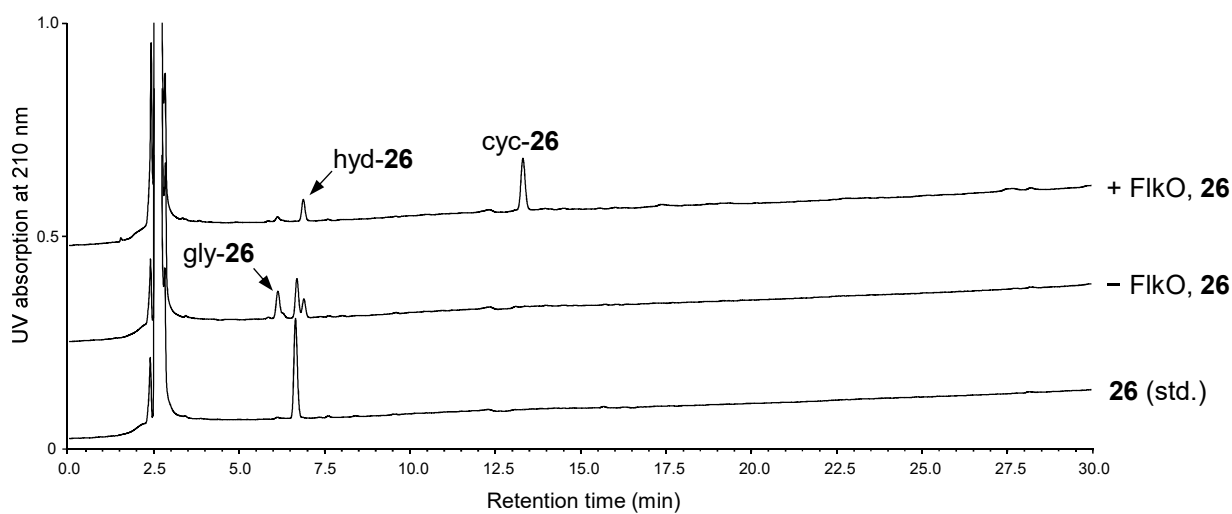

**Figure S34.** *In vitro* enzymatic reaction of FlkO using variant substrates **26**. Samples were analyzed by HPLC condition A in Table S1.

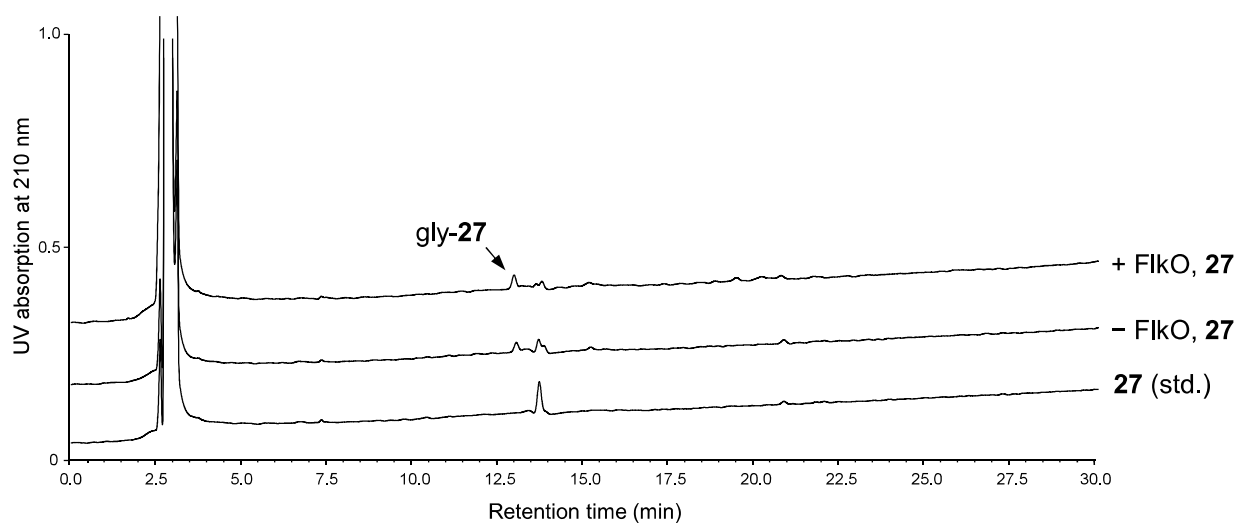

**Figure S35.** *In vitro* enzymatic reaction of FlkO using variant substrates **27**. Samples were analyzed by HPLC condition A in Table S1.

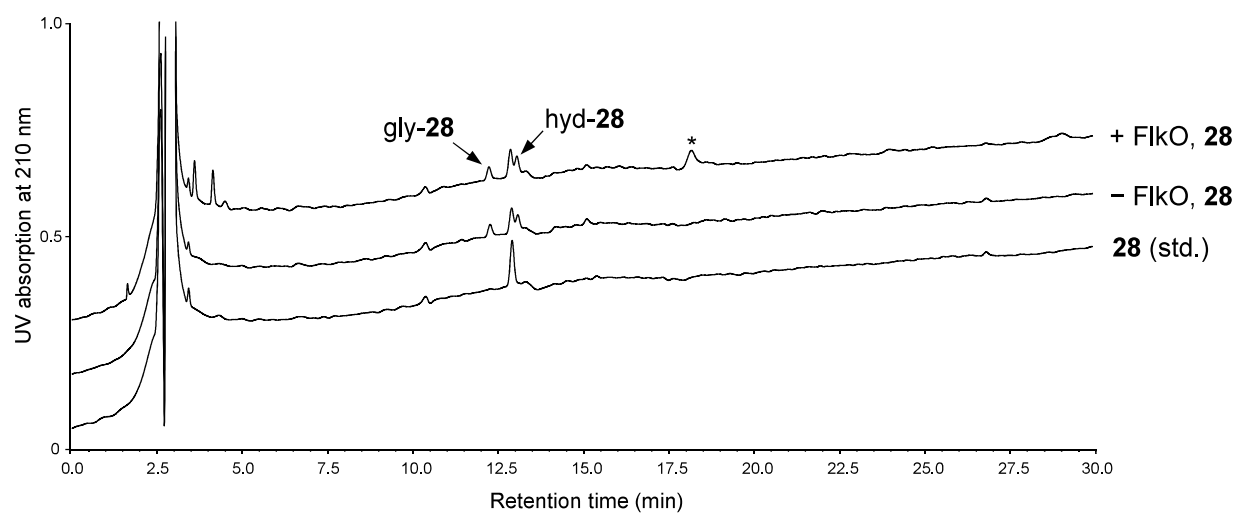

**Figure S36.** *In vitro* enzymatic reaction of FlkO using variant substrates **28**. Samples were analyzed by HPLC condition A in Table S1. \*Impurity from enzyme solution.

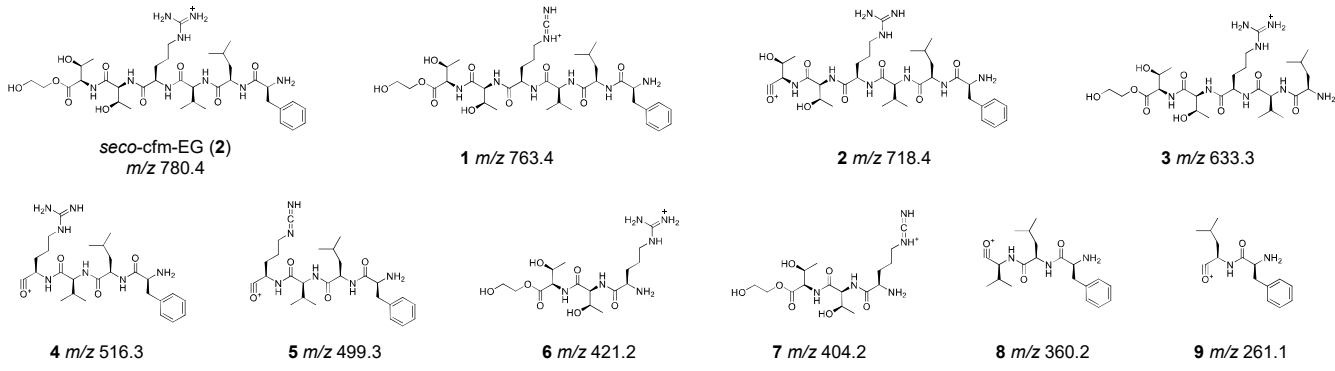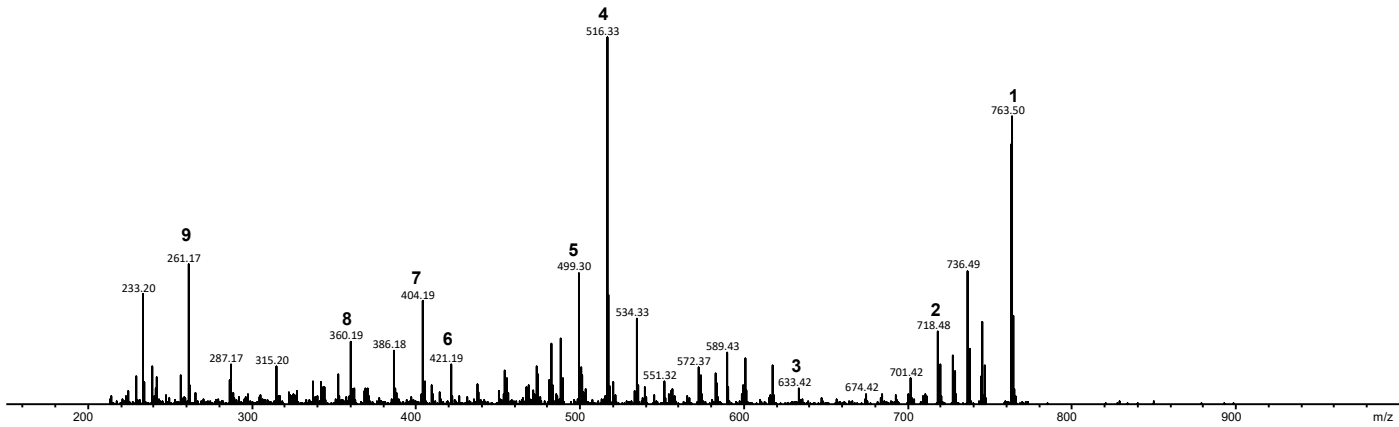

Figure S37. MS2 spectrum of *seco-cfm-EG (2)*

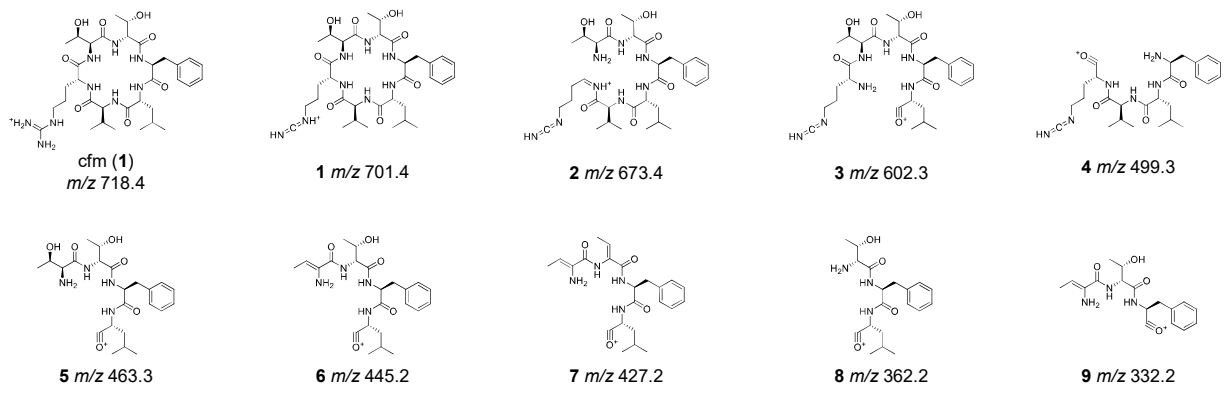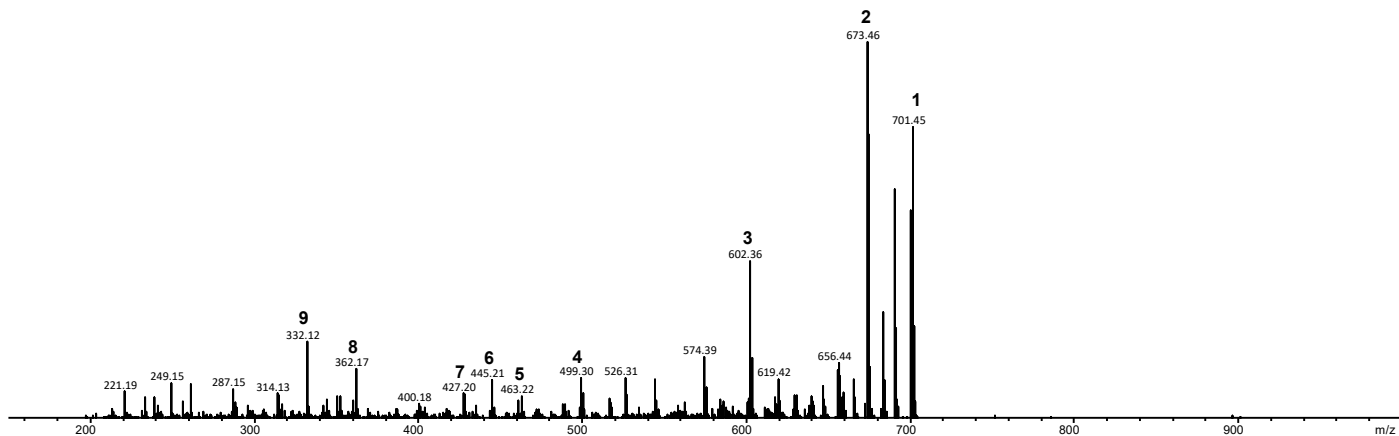

Figure S38. MS2 spectrum of *cfm (1)*

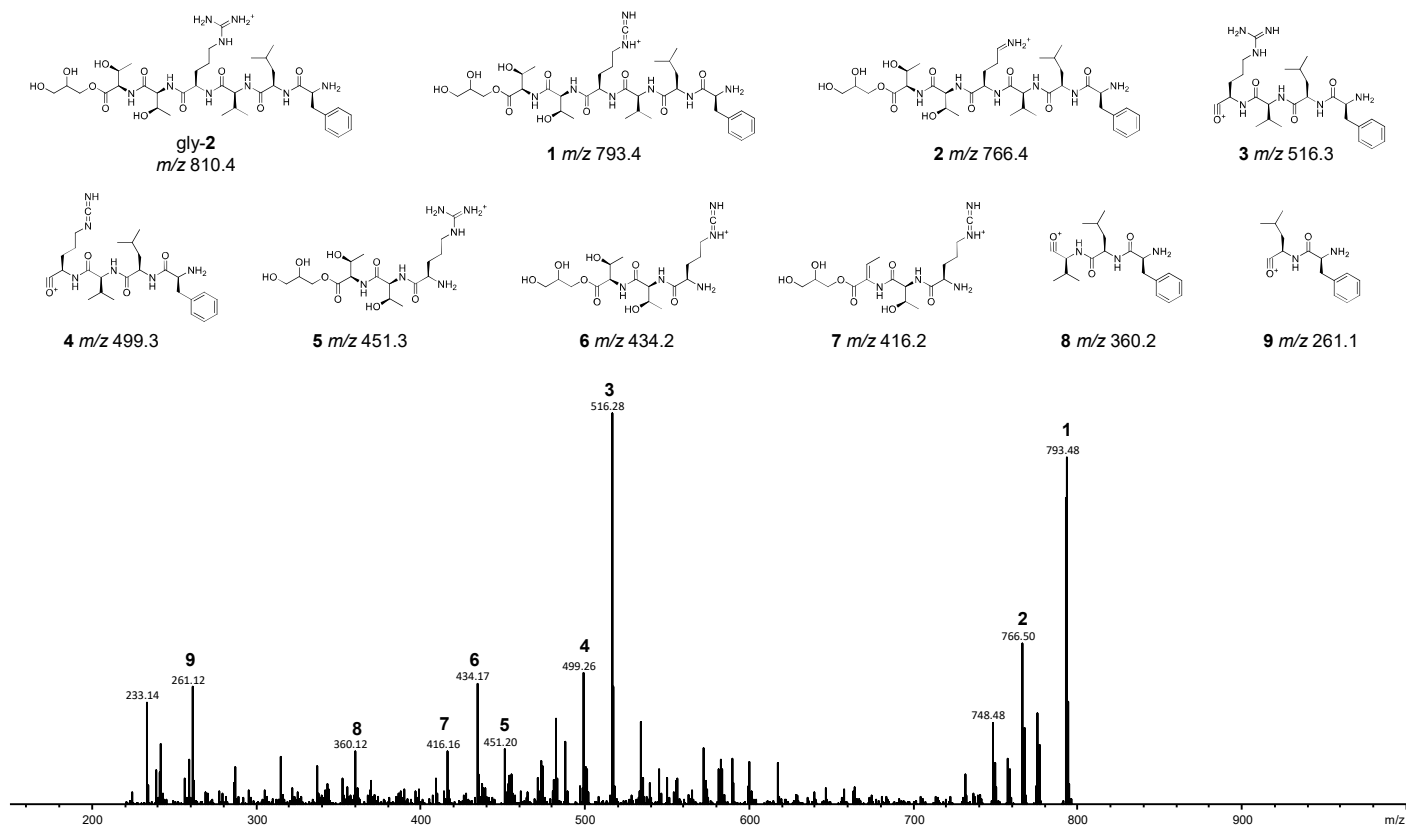

Figure S39. MS2 spectrum of glycerolysate of 2 (gly-2)

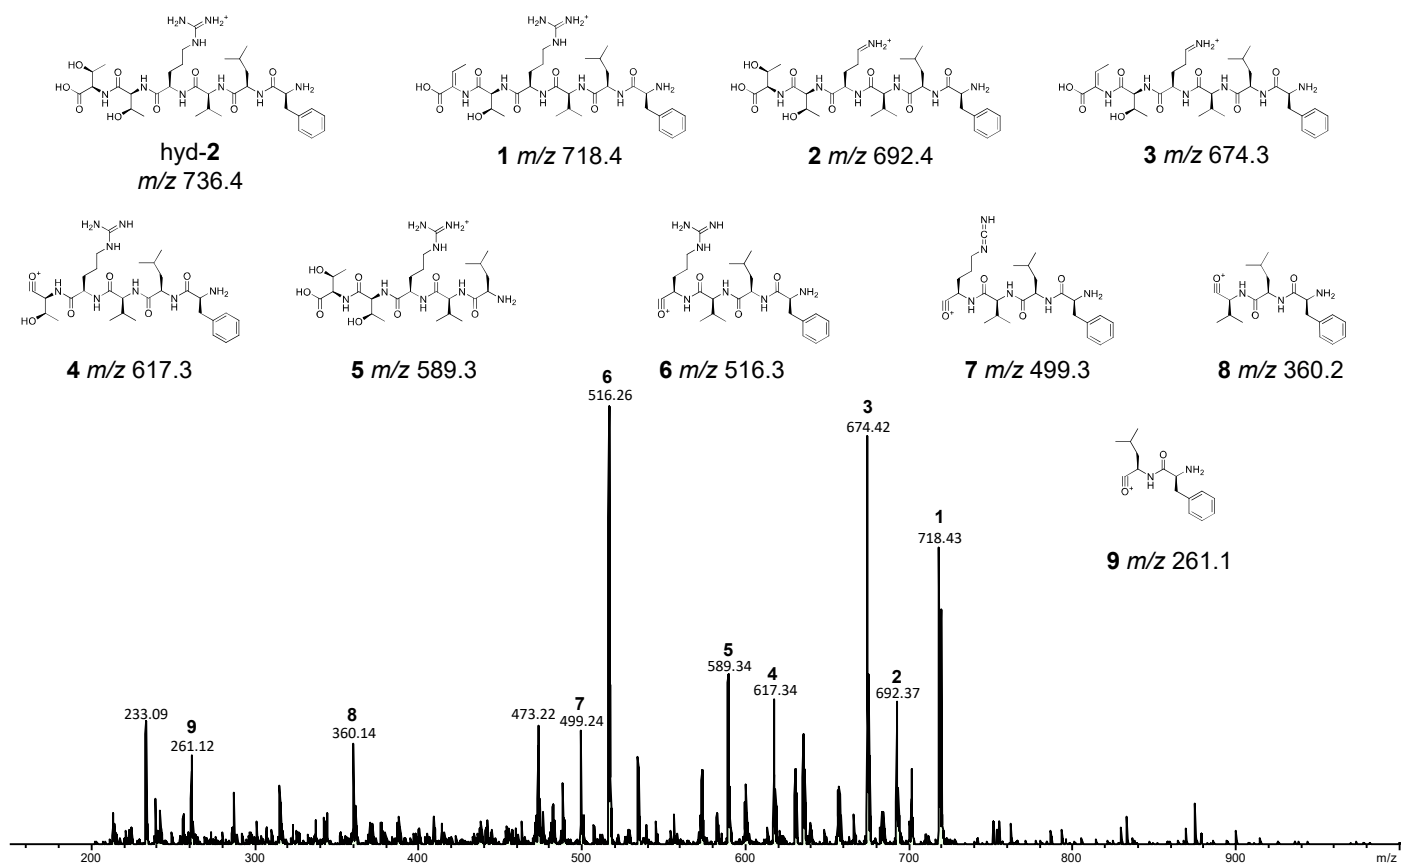

Figure S40. MS2 spectrum of hydrolysate of 2 (hyd-2)

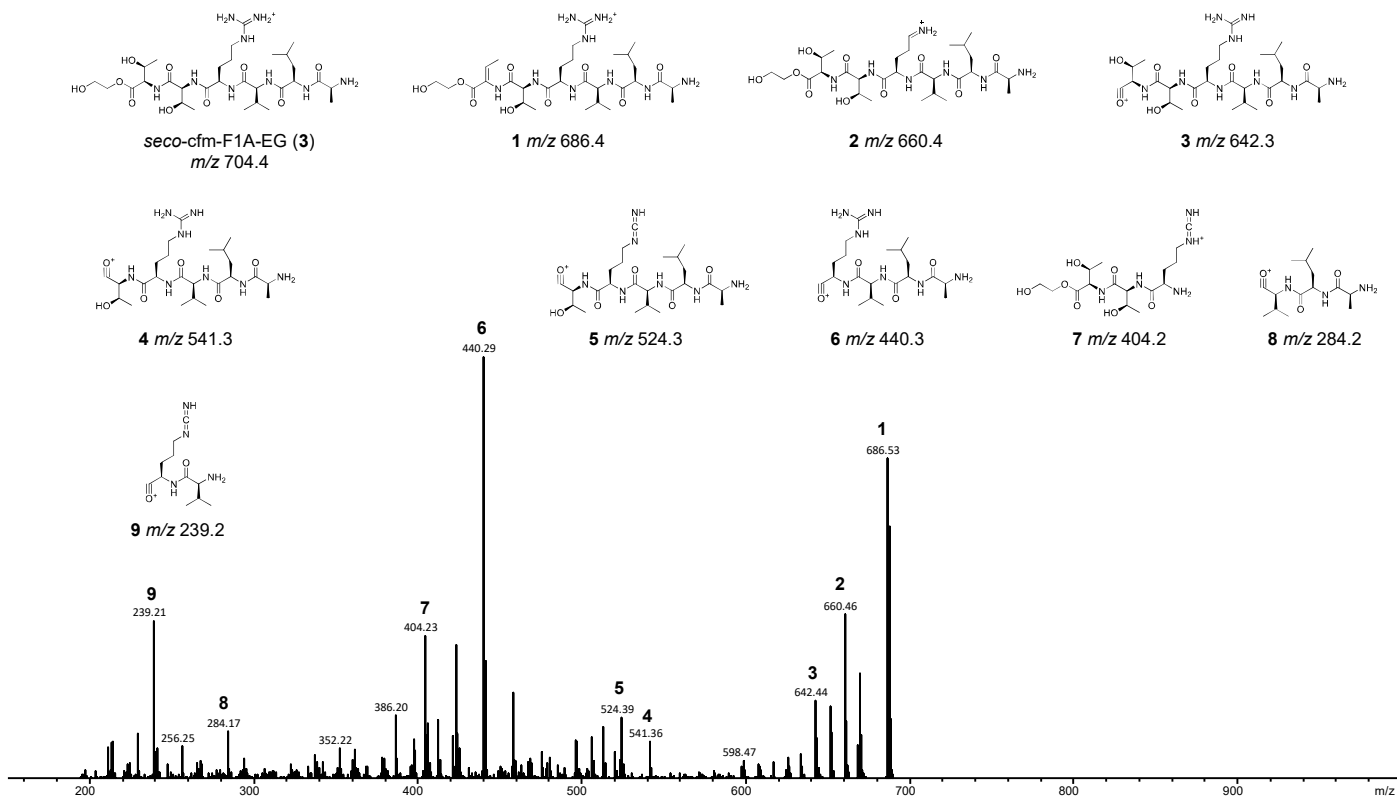

Figure S41. MS2 spectrum of *seco*-cfm-F1A-EG (3)

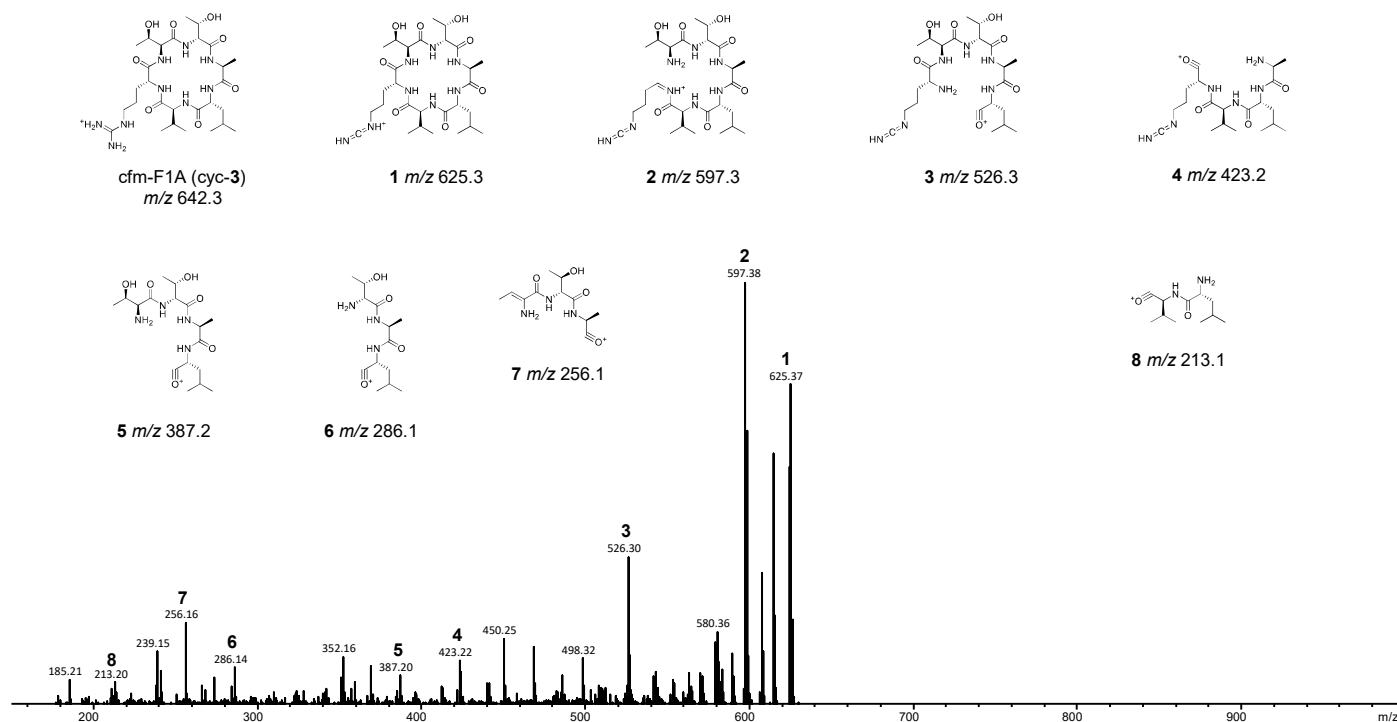

Figure S42. MS2 spectrum of cfm-F1A (cyc-3)

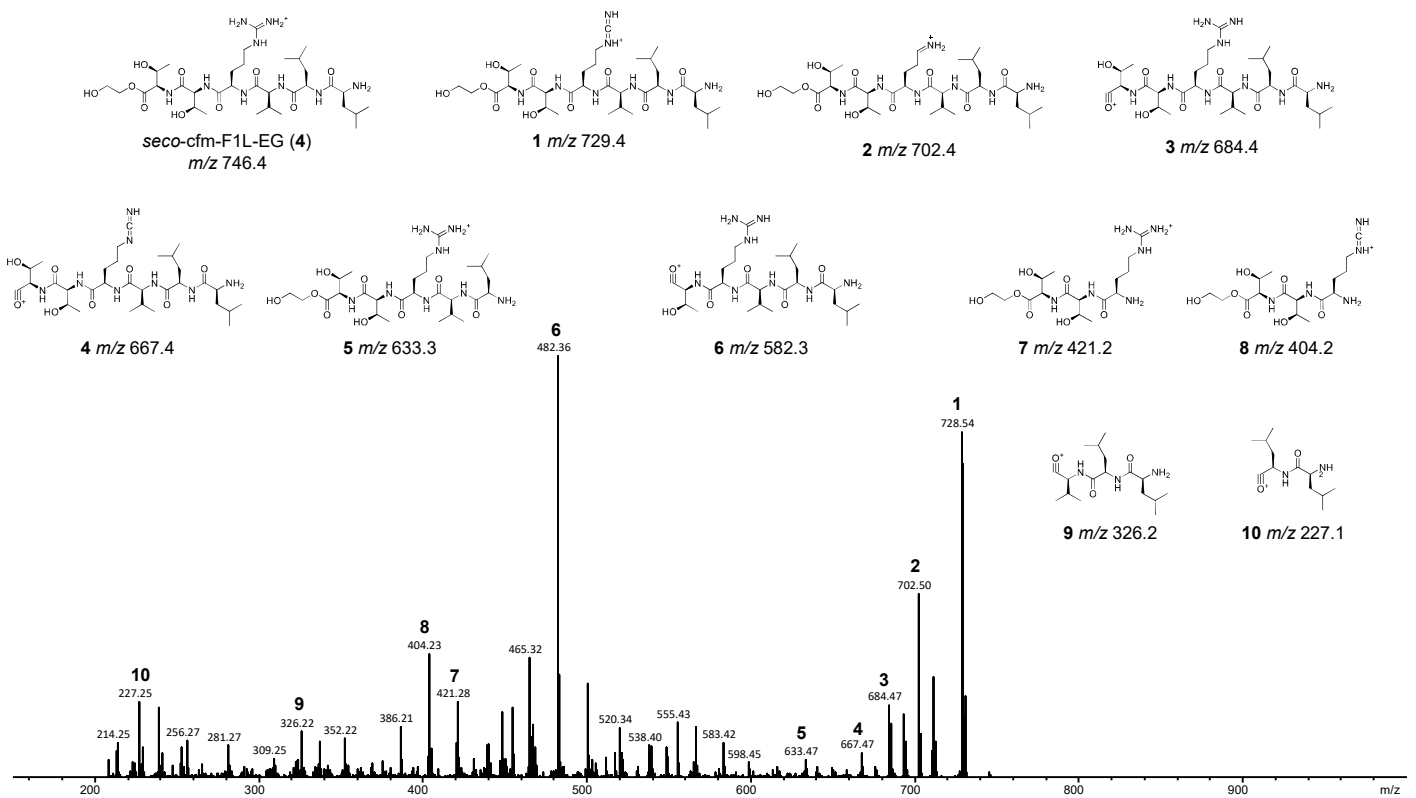

Figure S43. MS2 spectrum of *seco-cfm-F1L-EG* (4)

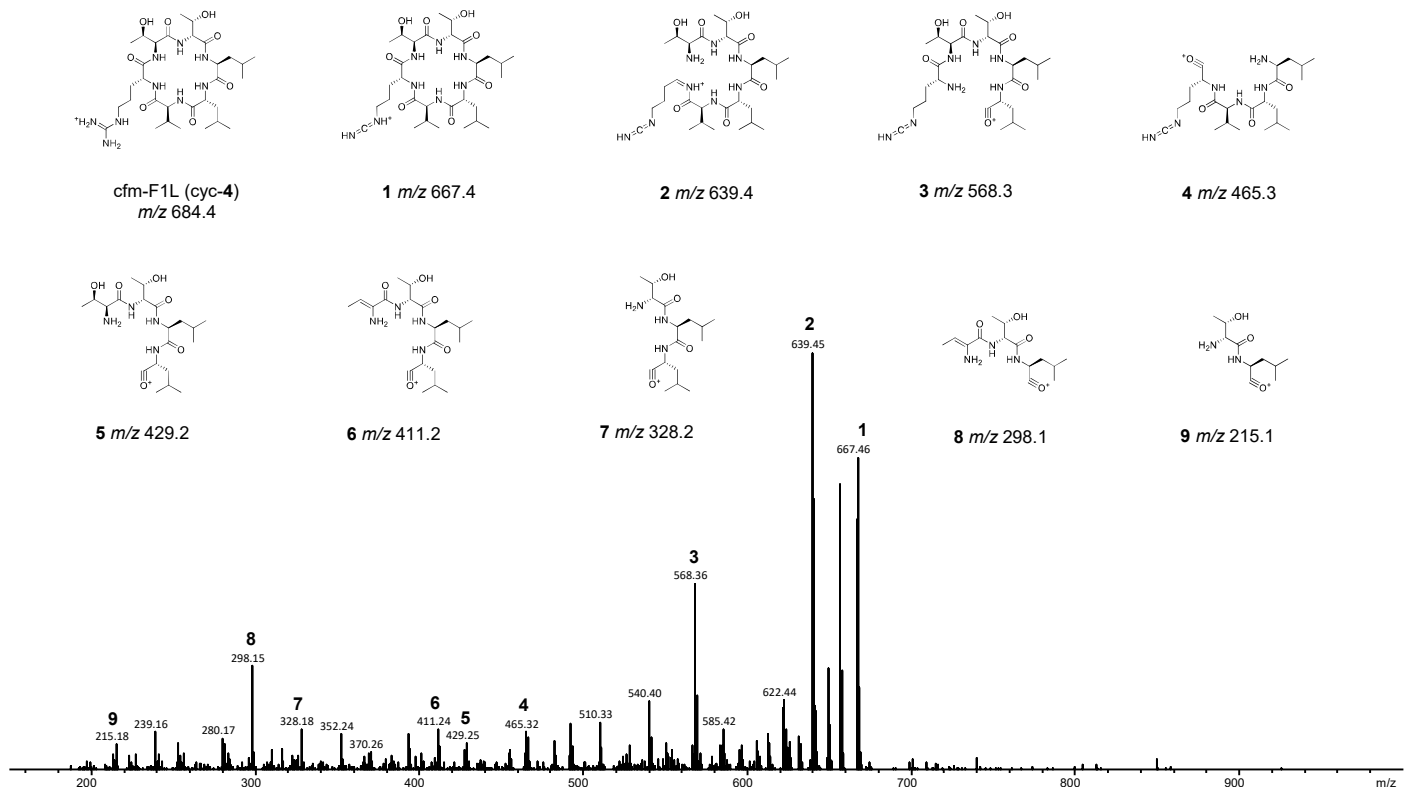

Figure S44. MS2 spectrum of *cfm-F1L* (cyc-4)



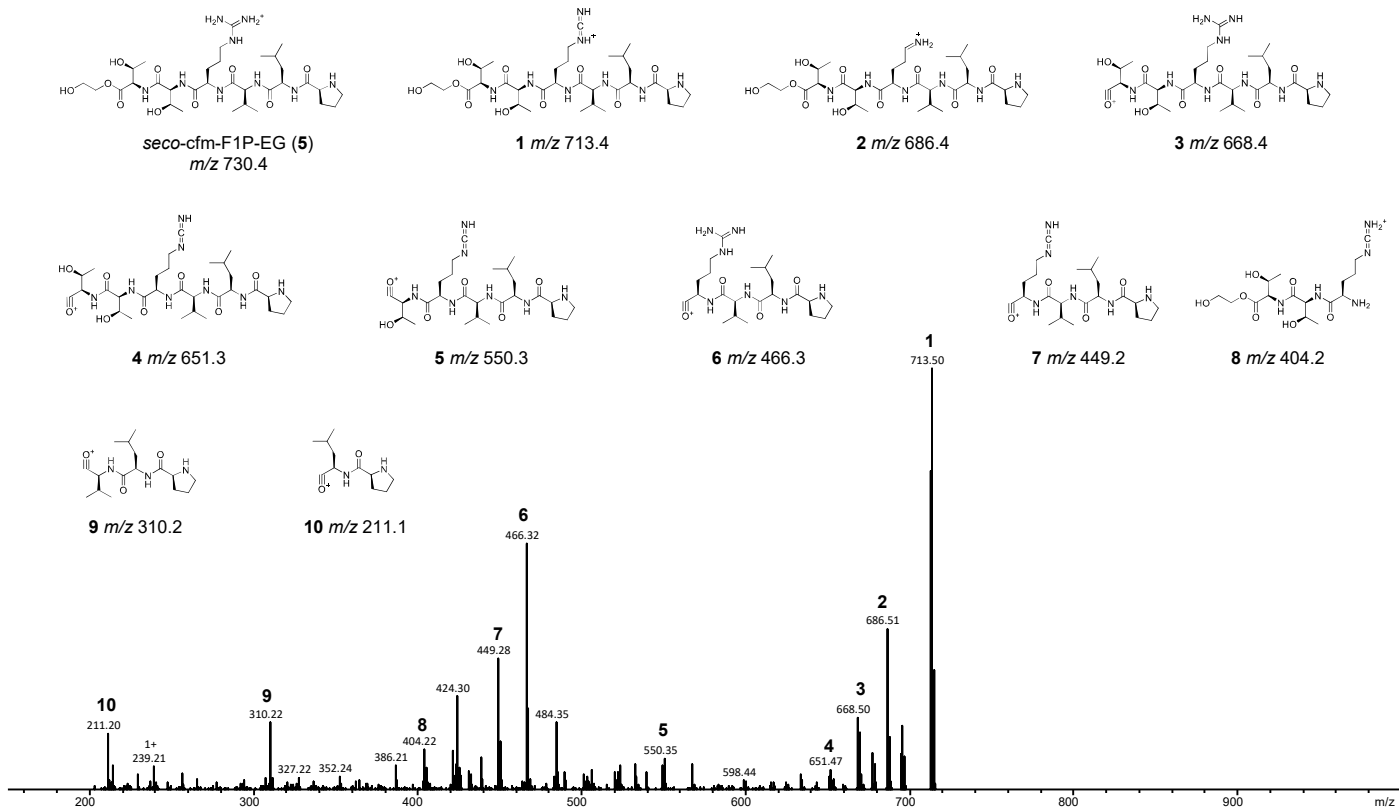

**Figure S45.** MS2 spectrum of *seco-cfm-F1P-EG (5)*

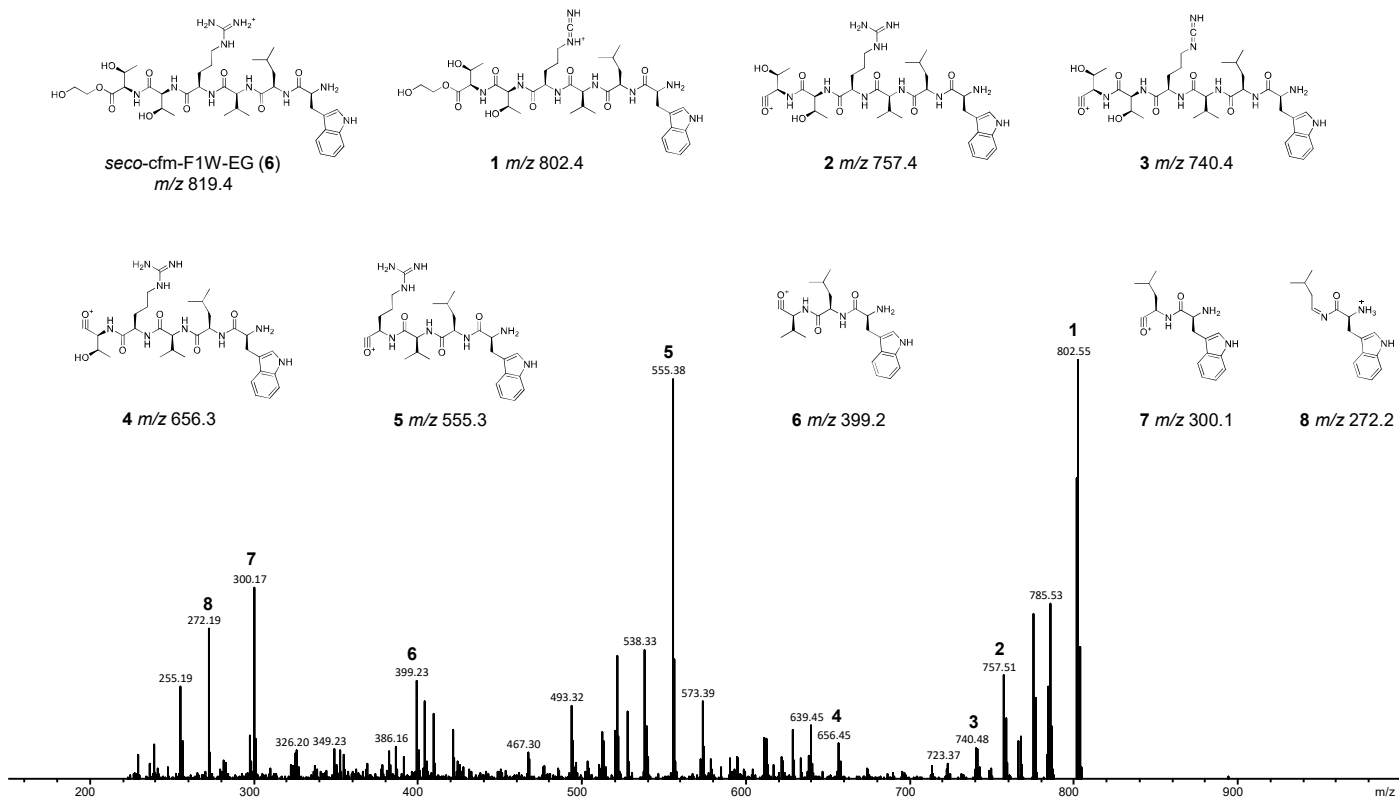

Figure S46. MS2 spectrum of *seco-cfm-F1W-EG (6)*

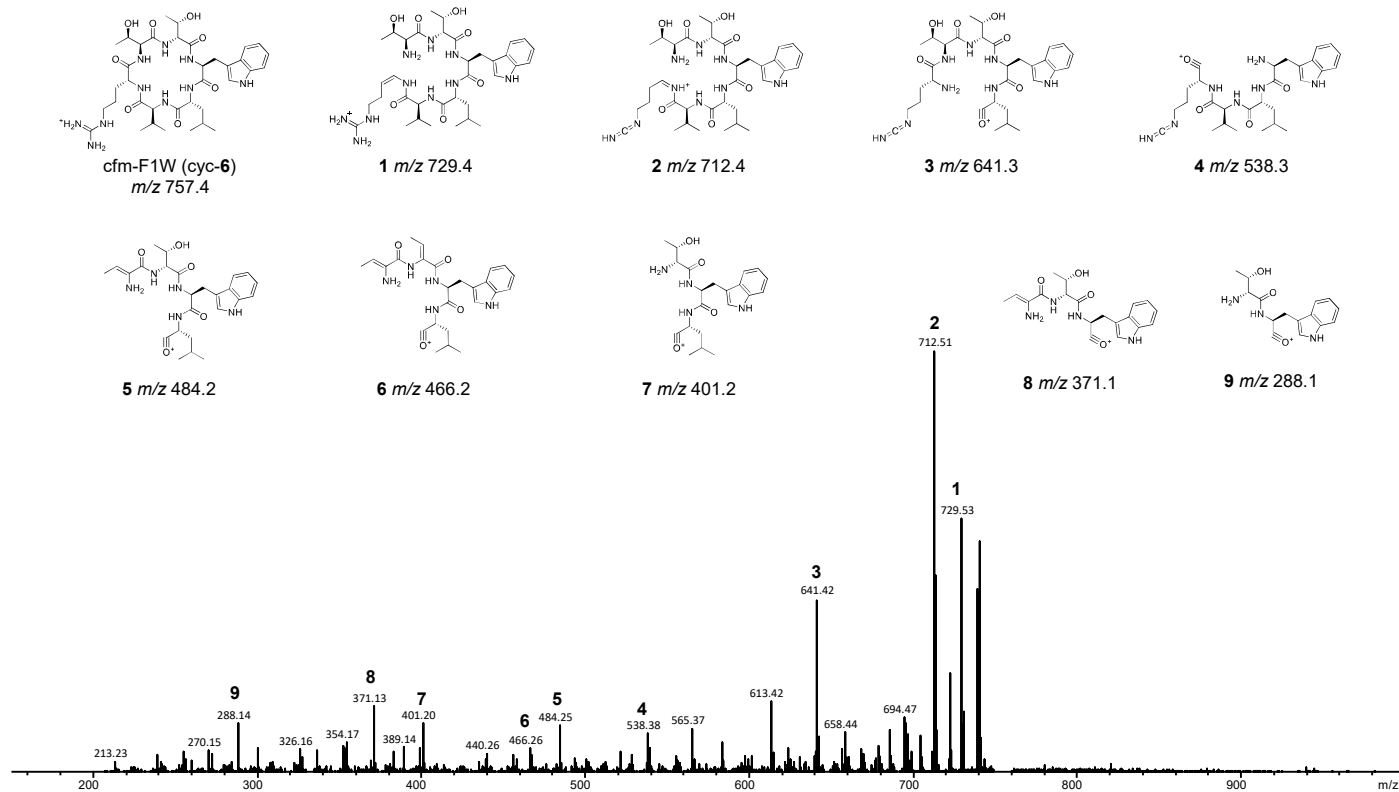

Figure S47. MS2 spectrum of *cfm-F1W (cyc-6)*

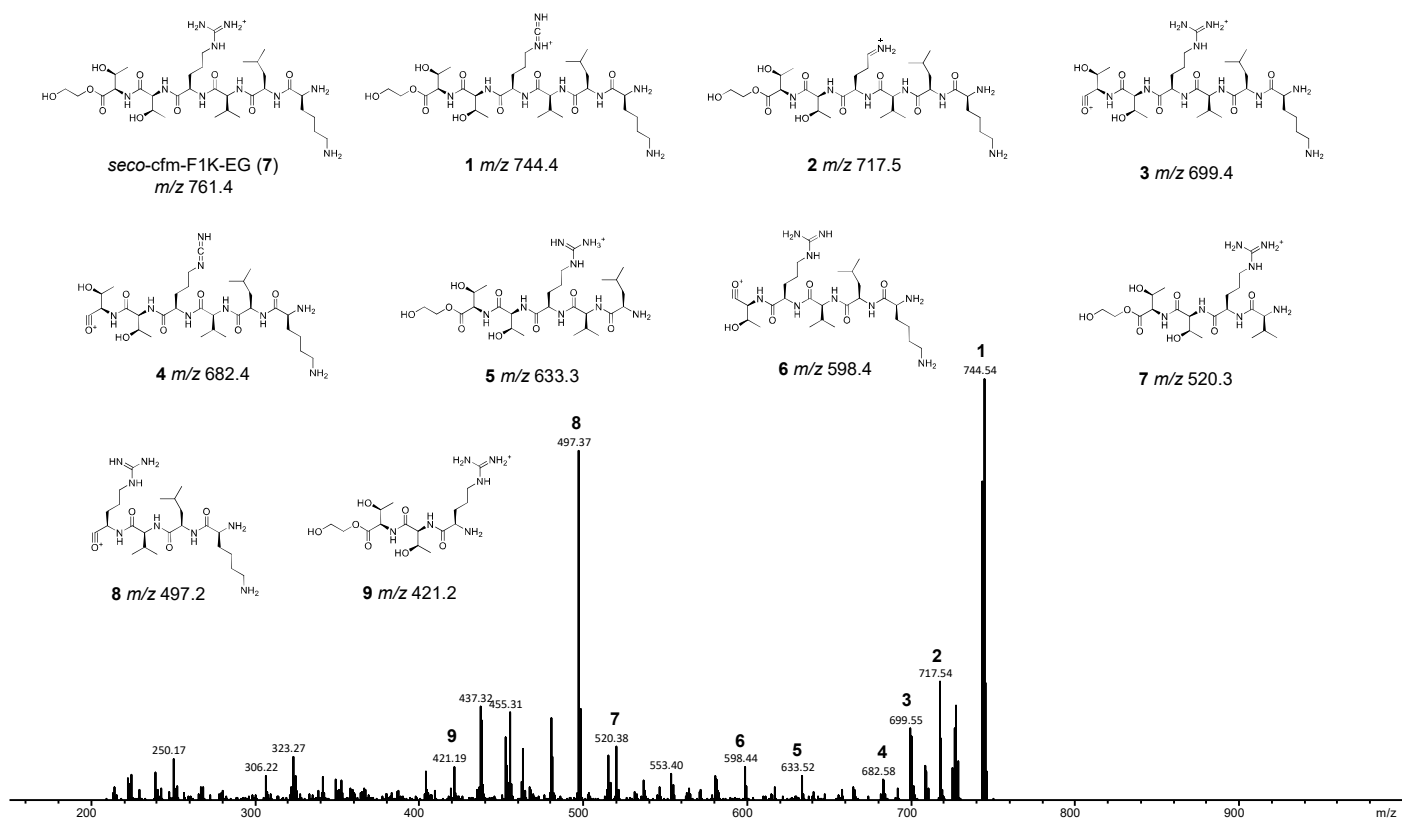

Figure S48. MS2 spectrum of *seco*-cfm-F1K-EG (7)

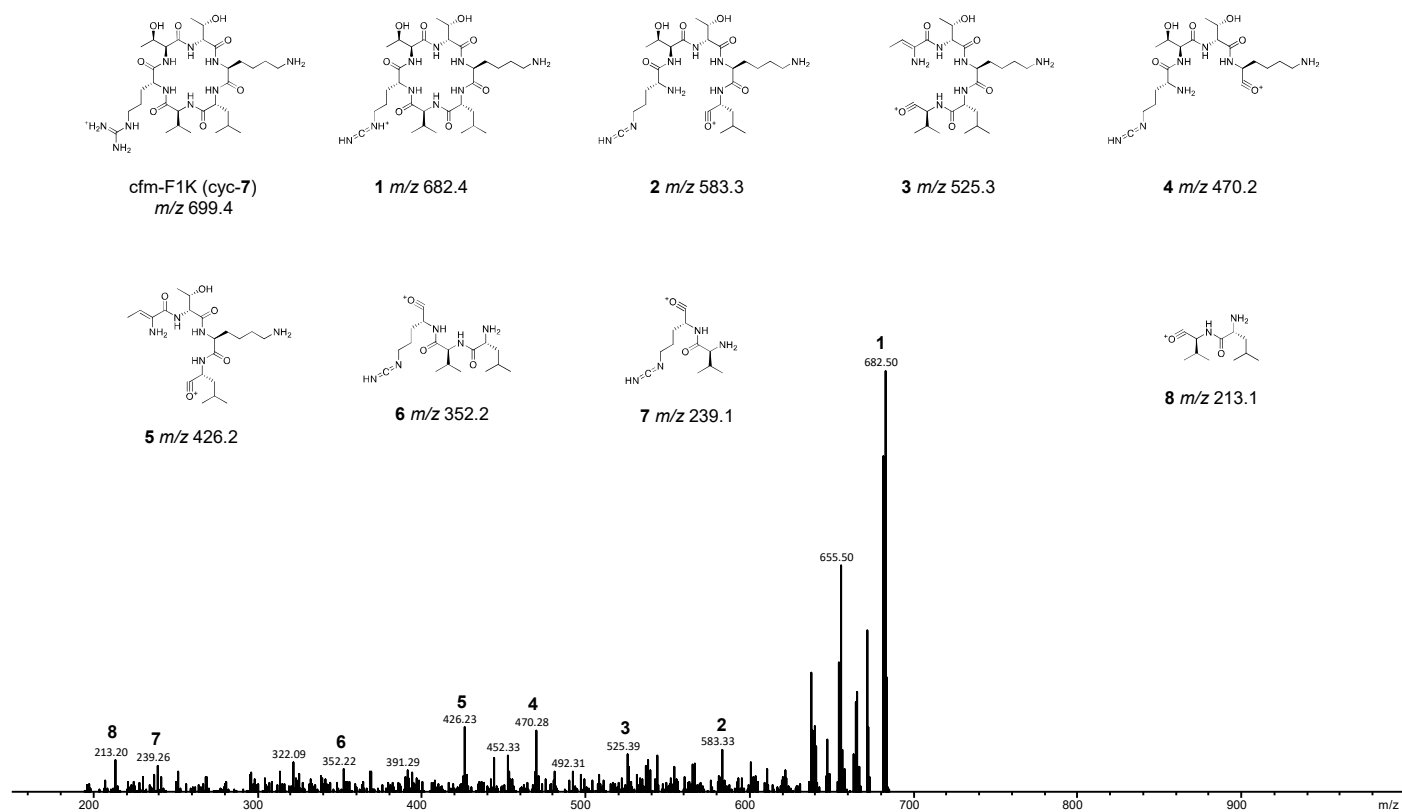

Figure S49. MS2 spectrum of cfm-F1K (cyc-7)

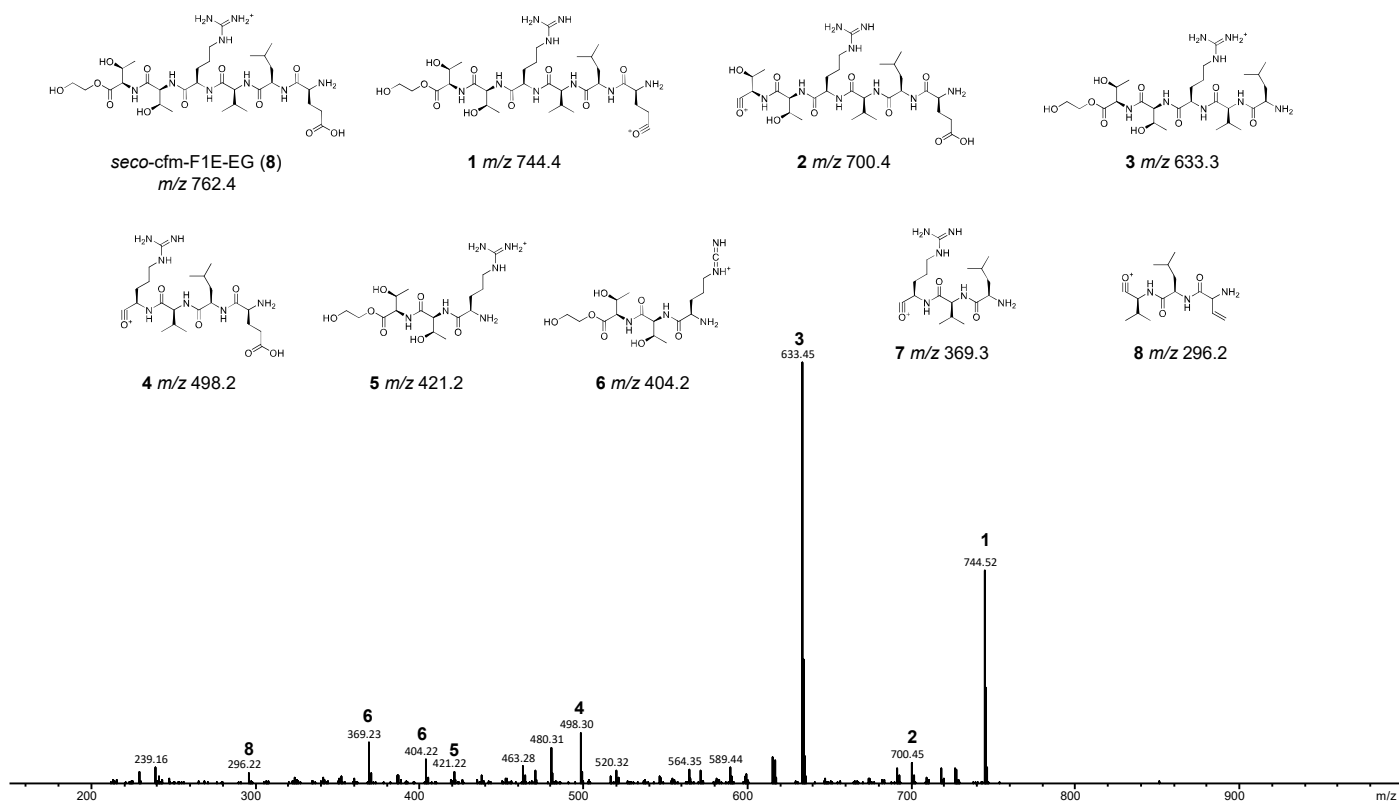

Figure S50. MS2 spectrum of *seco-cfm-F1E-EG* (8)

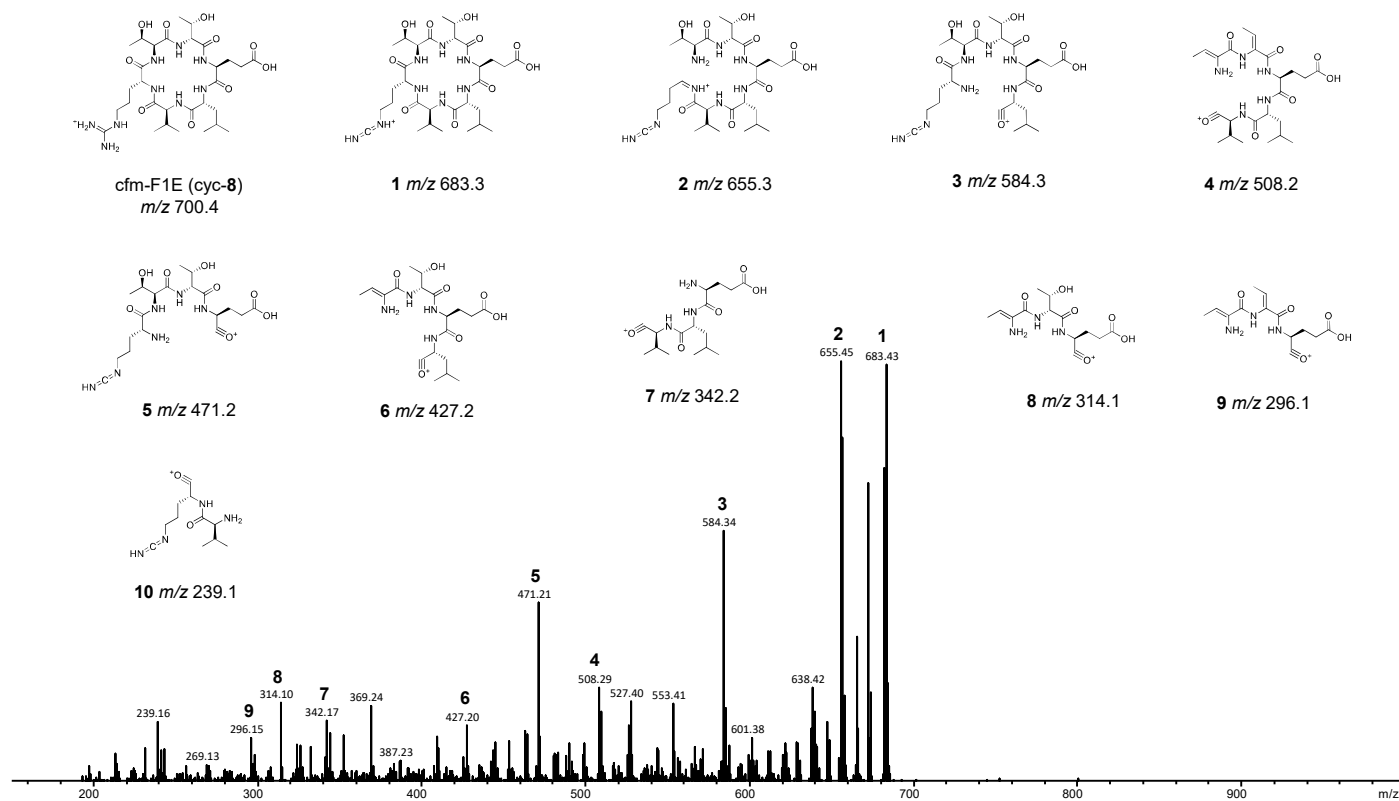

Figure S51. MS2 spectrum of *cfm-F1E* (cyc-8)

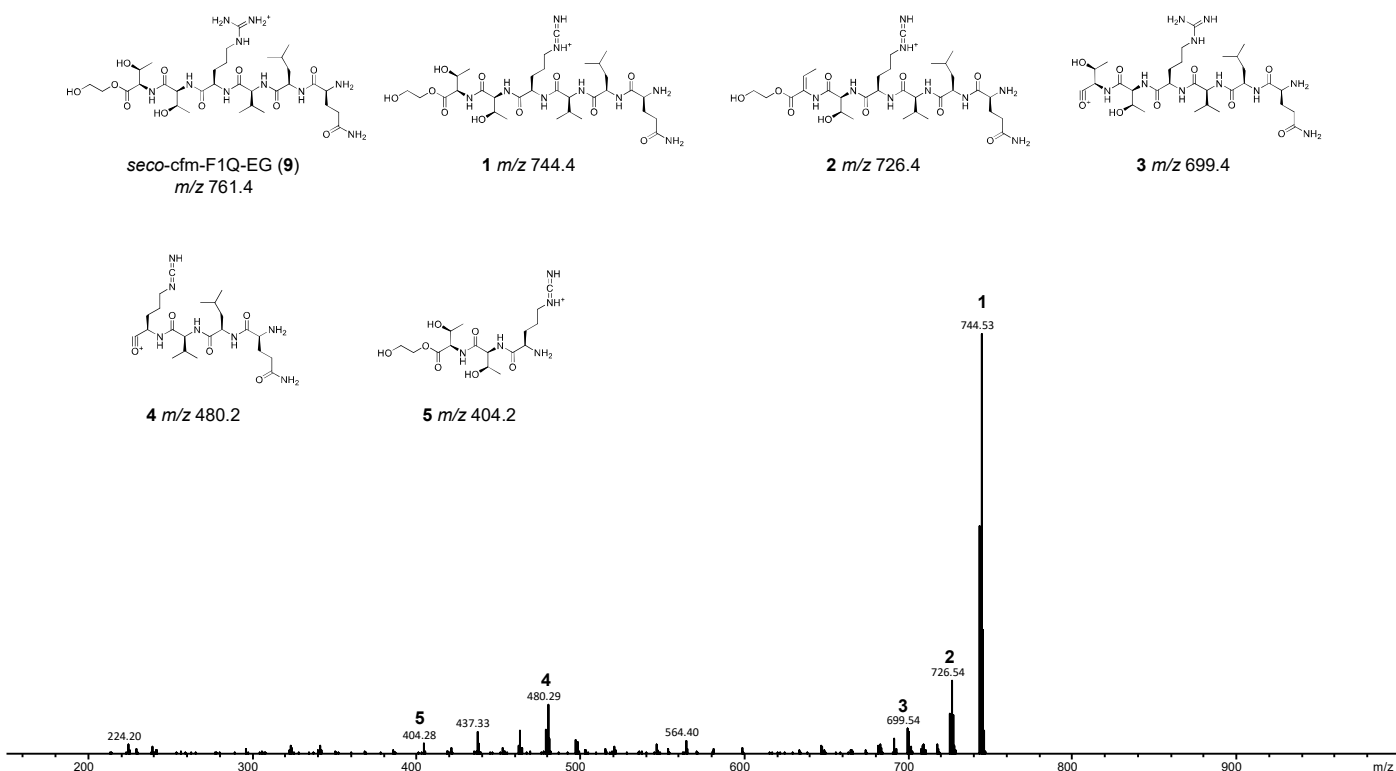

Figure S52. MS2 spectrum of *seco*-cfm-F1Q-EG (9)

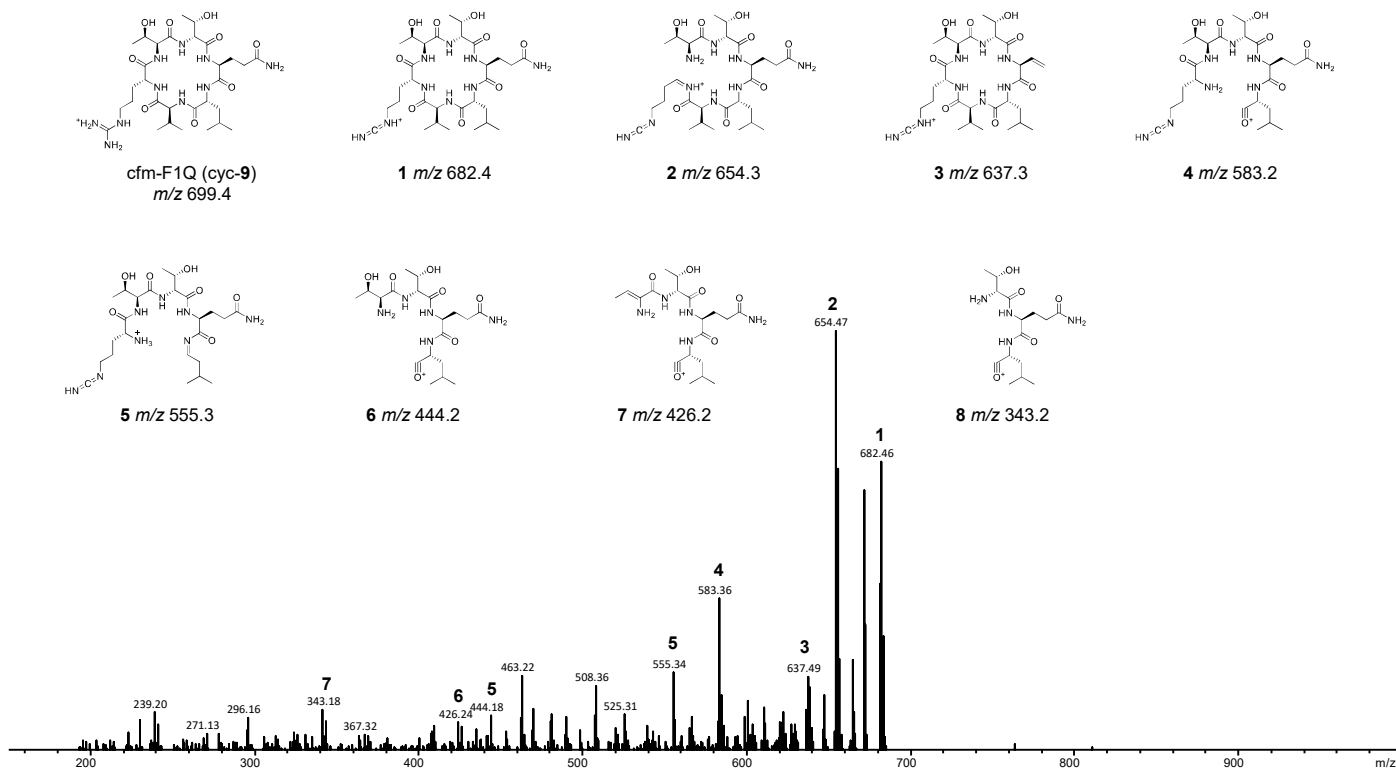

Figure S53. MS2 spectrum of cfm-F1Q (cyc-9)

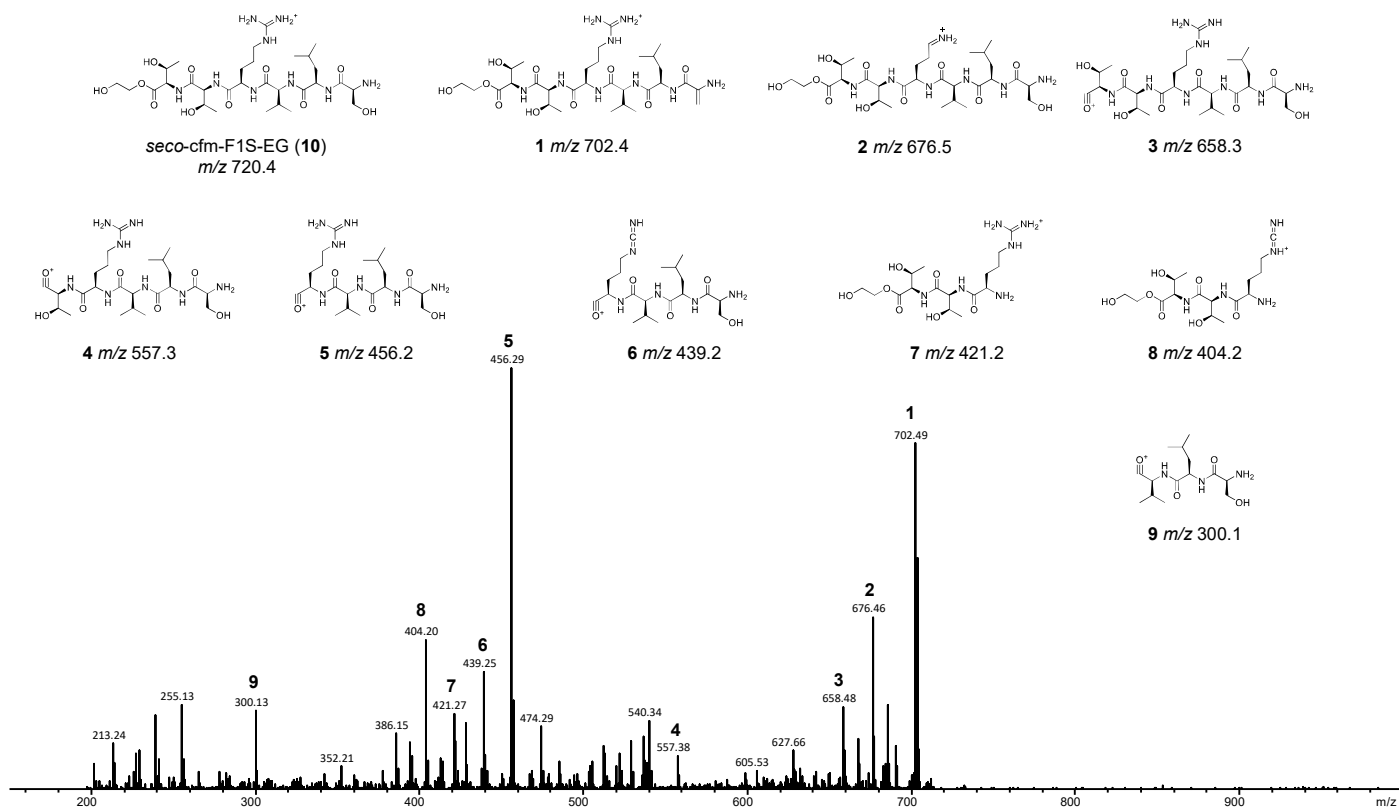

Figure S54. MS2 spectrum of *seco-cfm-F1S-EG* (10)

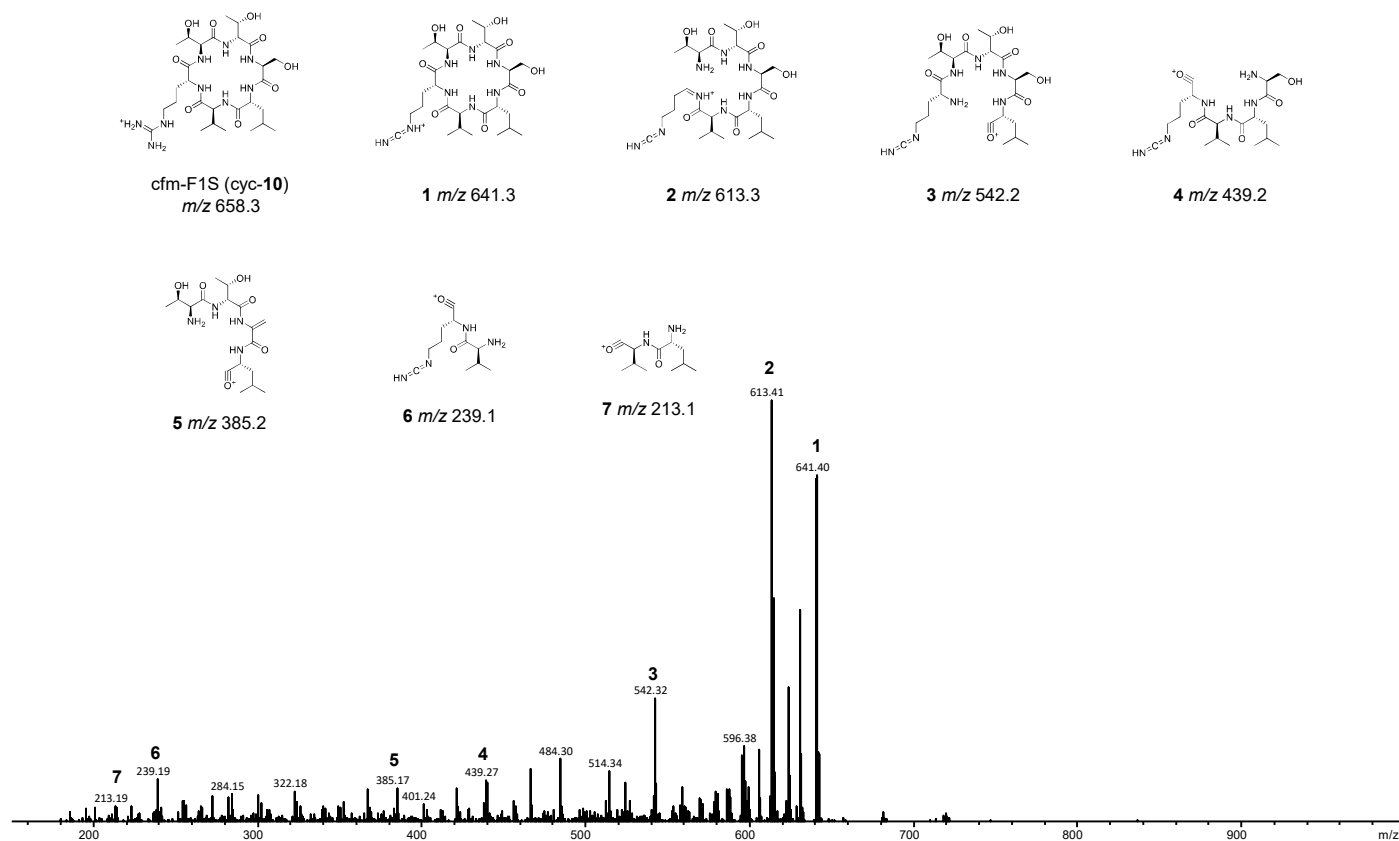

Figure S55. MS2 spectrum of *cfm-F1S* (cyc-10)

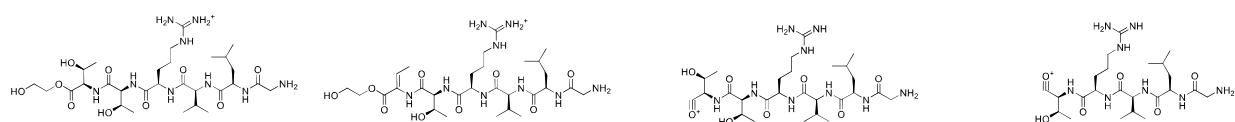

*seco*-cfm-F1G-EG (11)  
 $m/z$  690.4

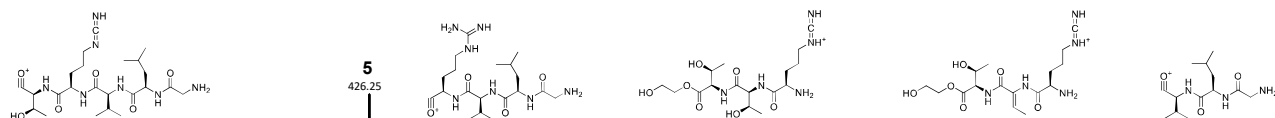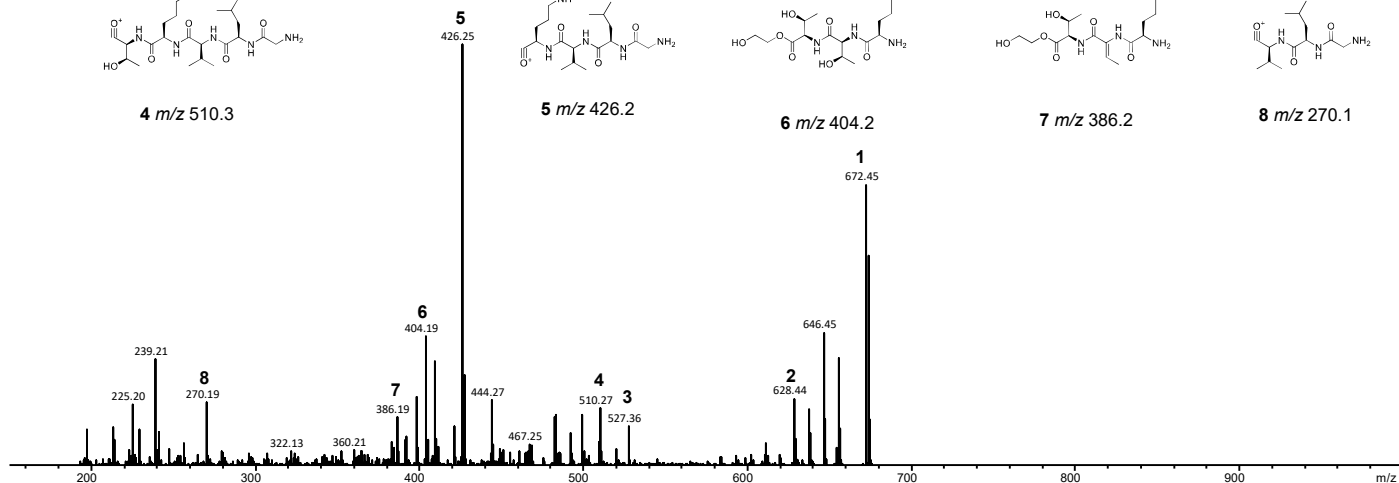

Figure S56. MS2 spectrum of *seco*-cfm-F1G-EG (11)

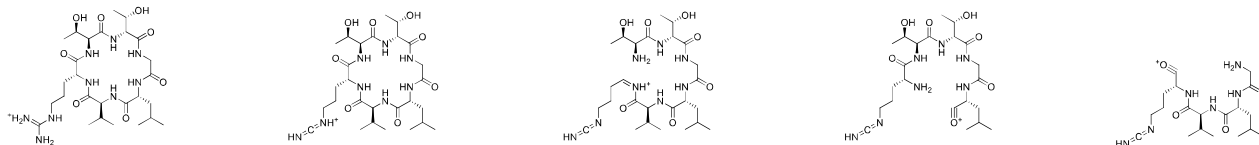

cfm-F1G (cyc-11)  
 $m/z$  628.4

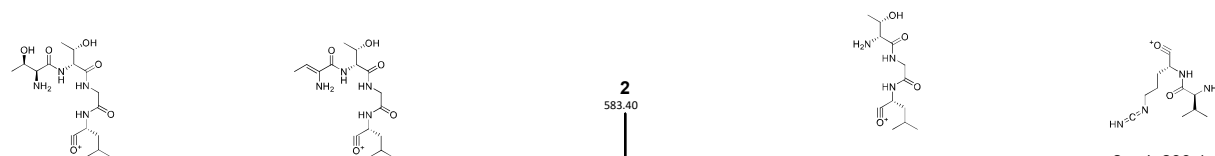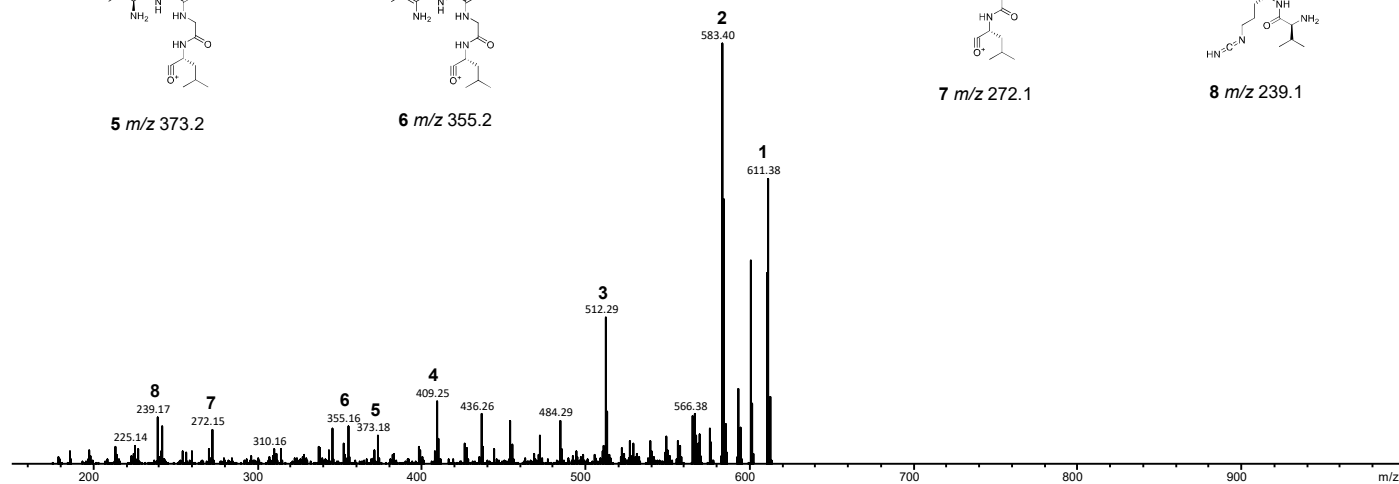

Figure S57. MS2 spectrum of cfm-F1G (cyc-11)

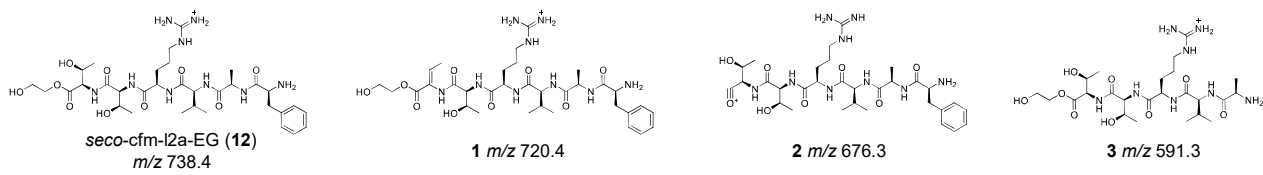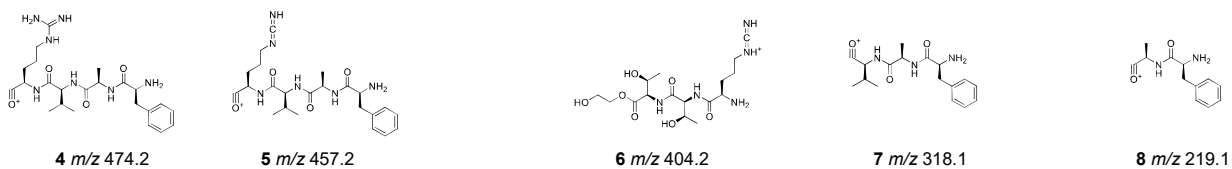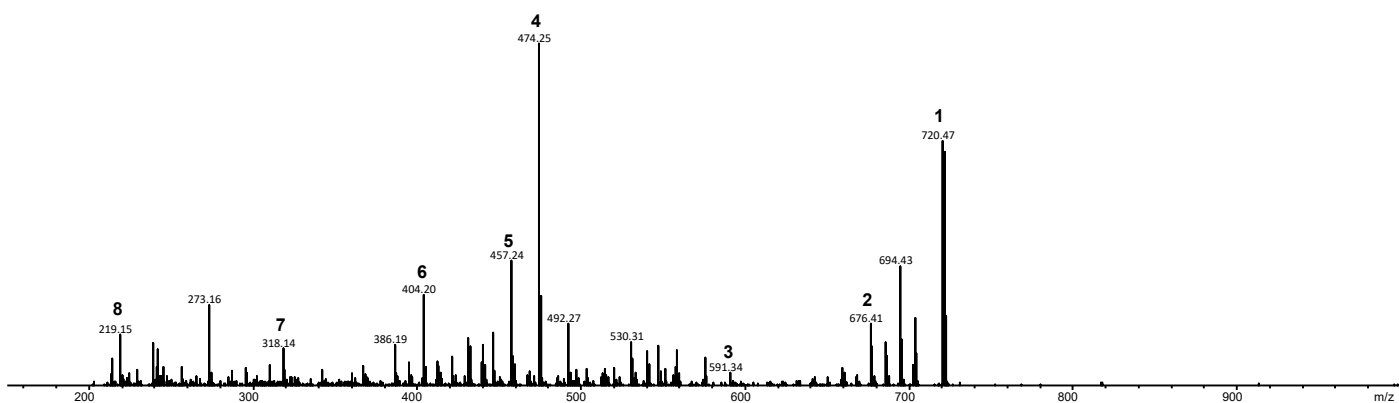

Figure S58. MS2 spectrum of *seco-cfm-l2a-EG (12)*

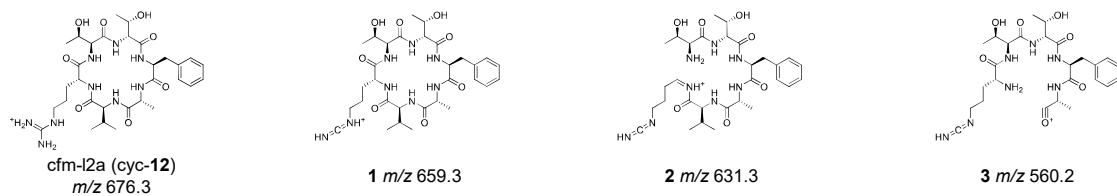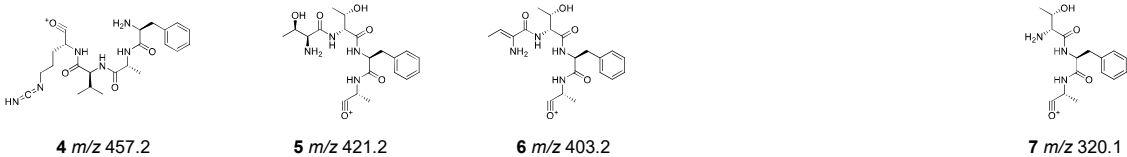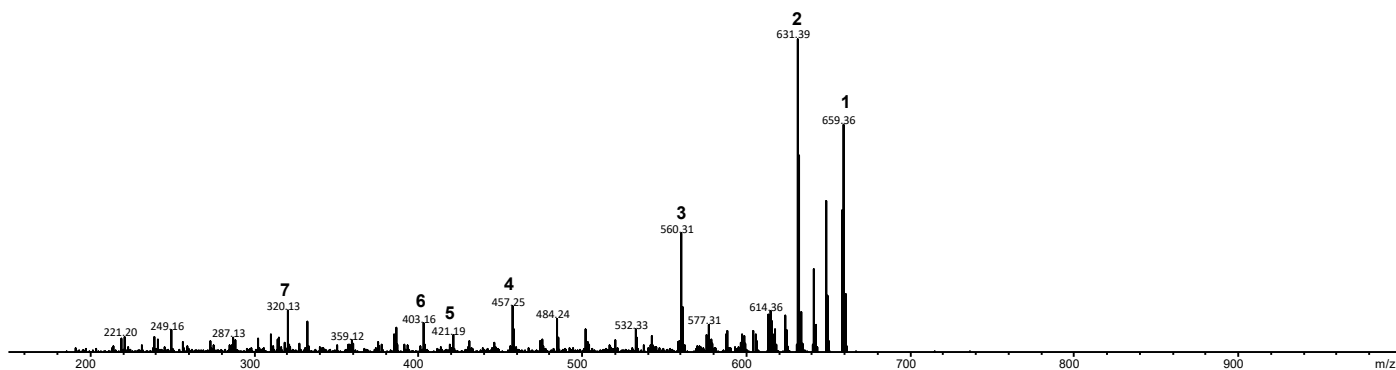

Figure S59. MS2 spectrum of *cfm-l2a (cyc-12)*



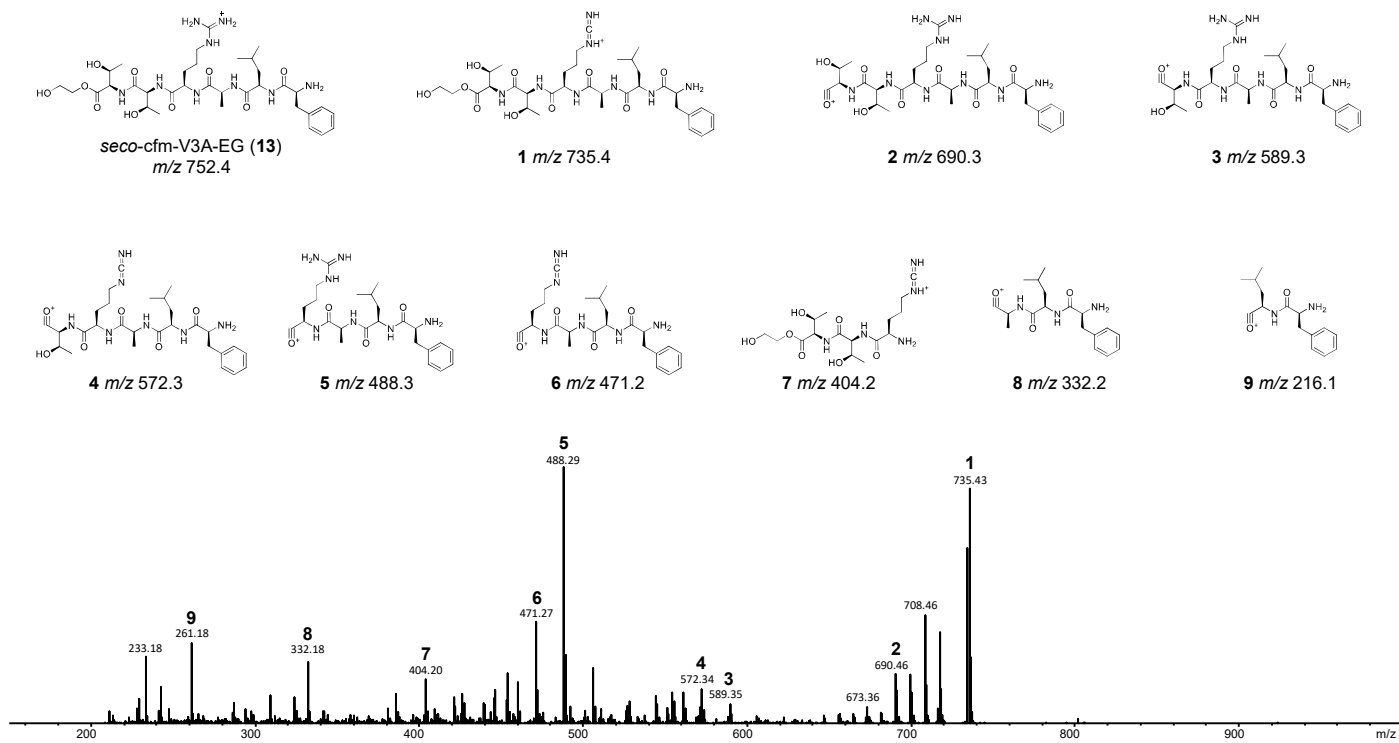

**Figure S60.** MS2 spectrum of *seco-cfm-V3A-EG* (13)

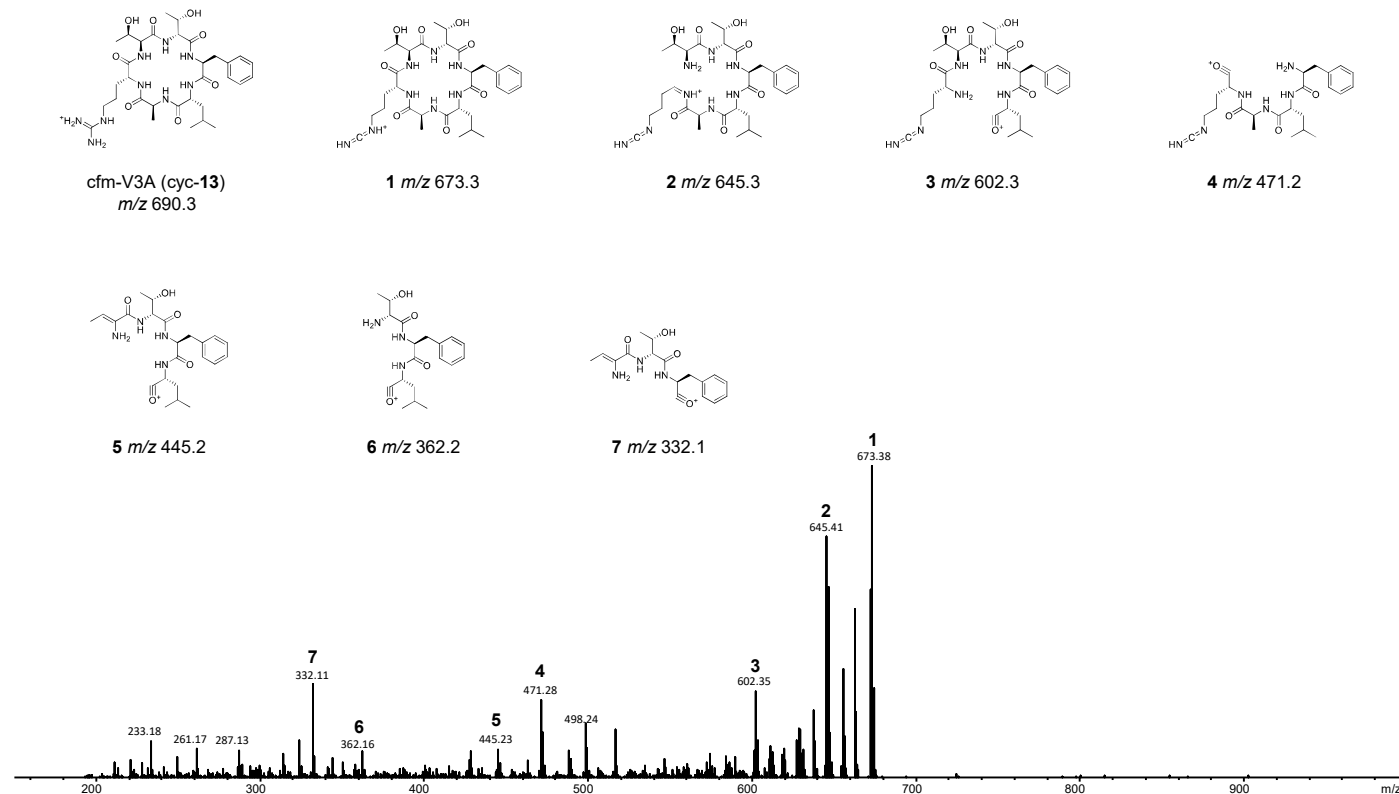

**Figure S61.** MS2 spectrum of *cfm-V3A* (cyc-13)

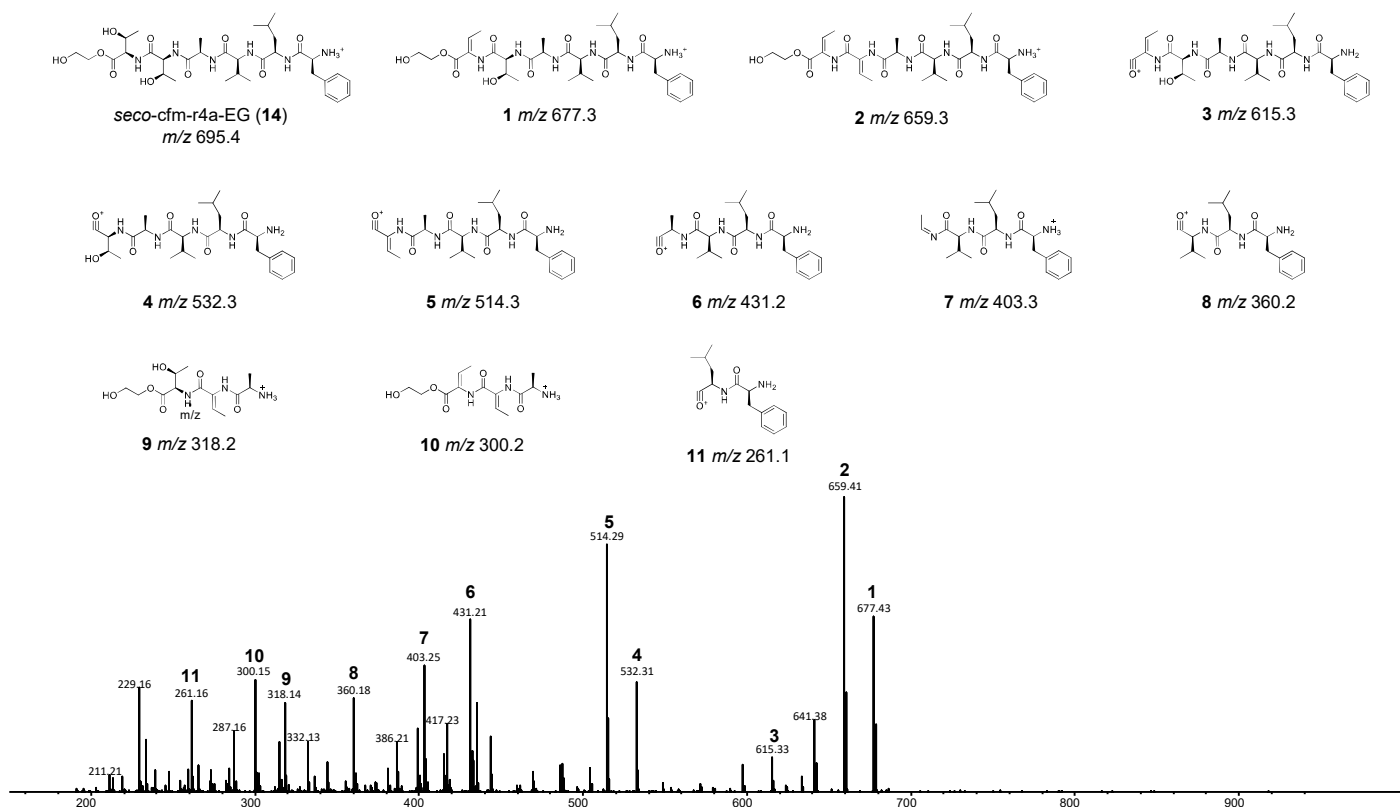

Figure S62. MS2 spectrum of *seco-cfm-r4a-EG* (14)

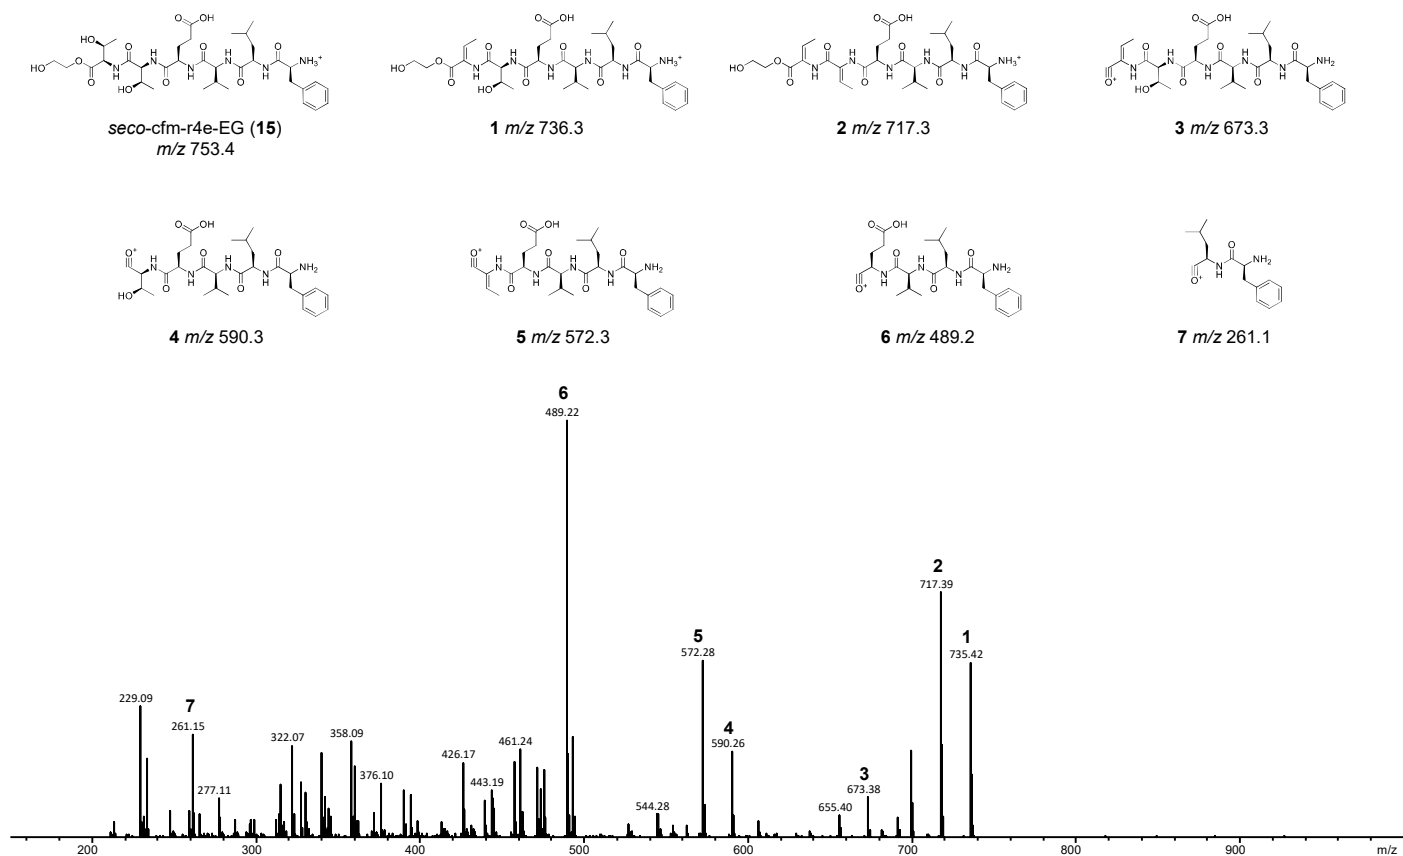

Figure S63. MS2 spectrum of *seco-cfm-r4e-EG* (15)

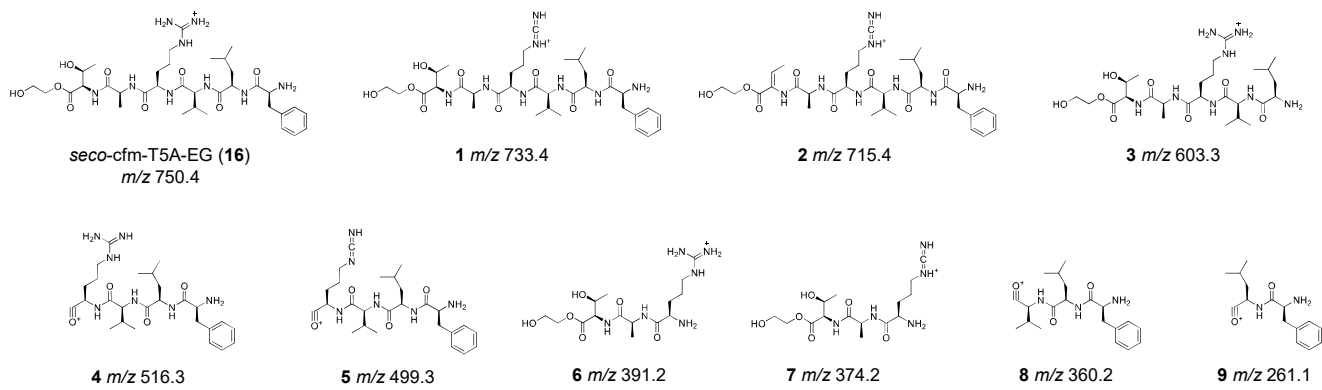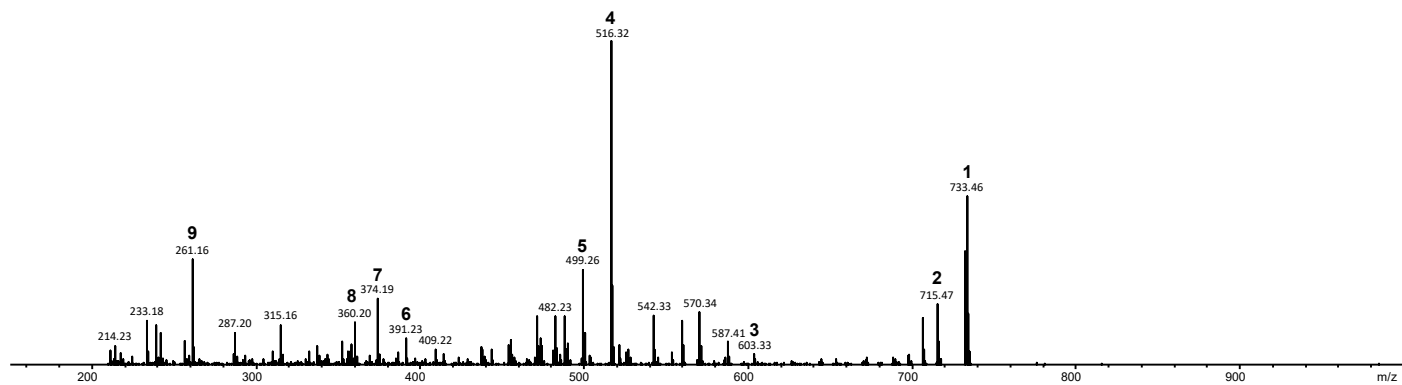

Figure S64. MS2 spectrum of *seco-cfm-T5A-EG* (16)

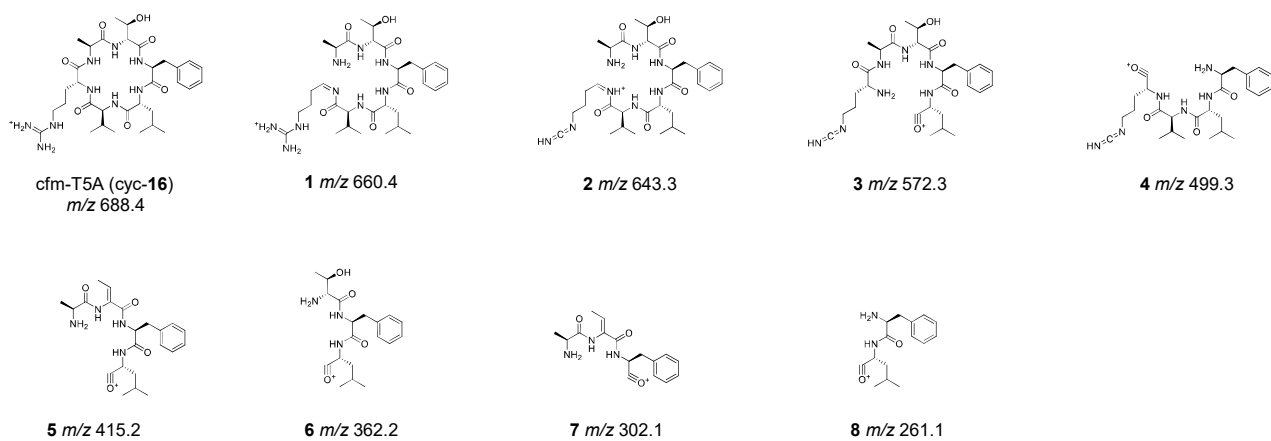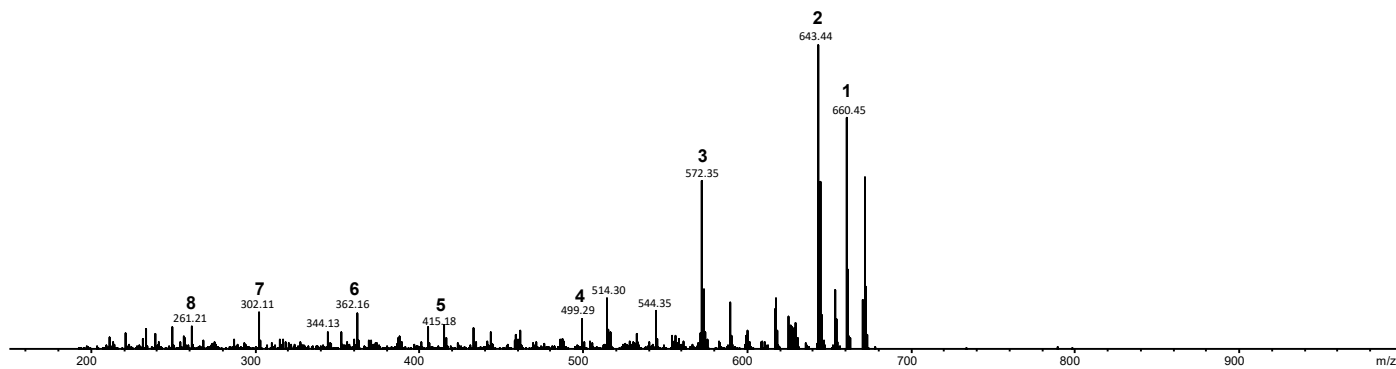

Figure S65. MS2 spectrum of *cfm-T5A* (cyc-16)

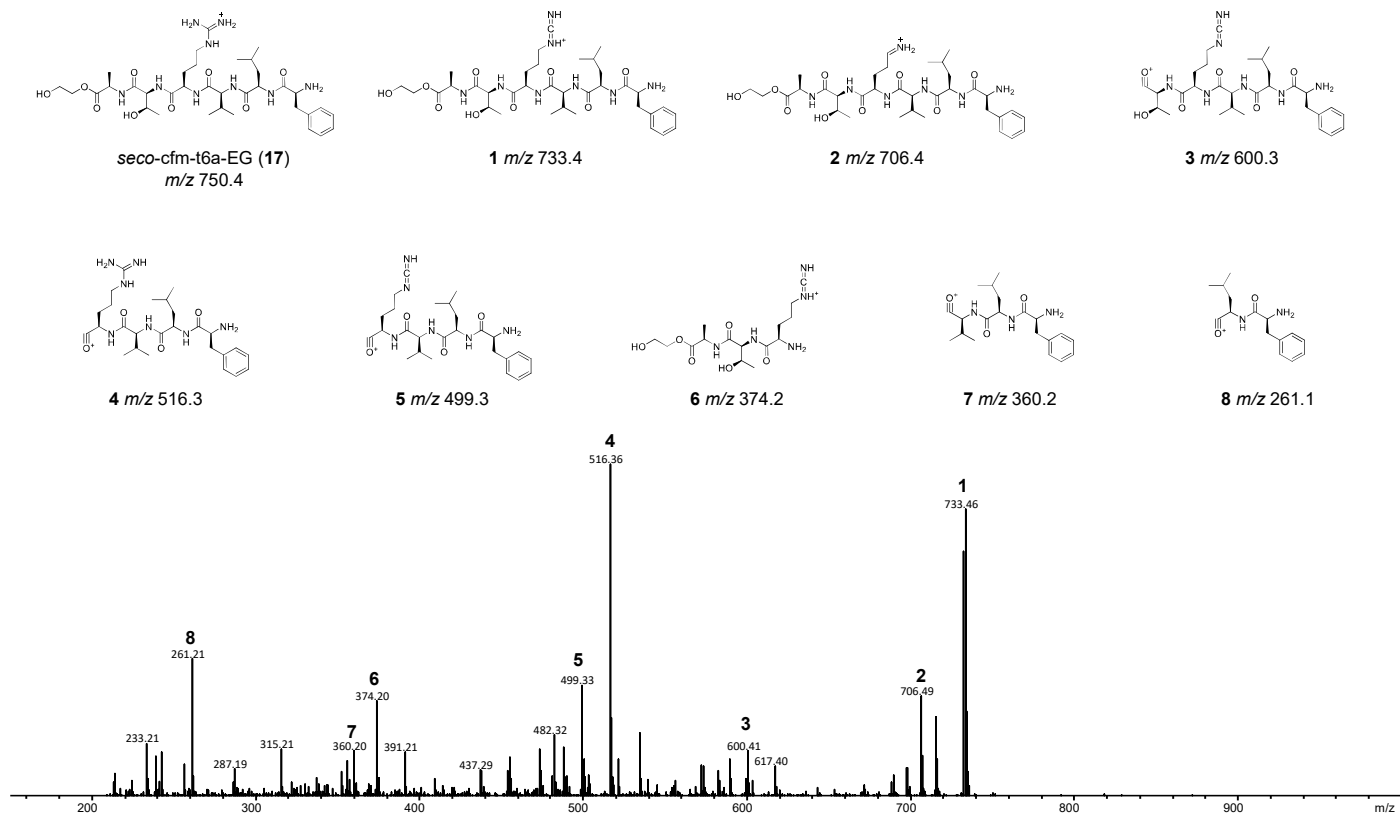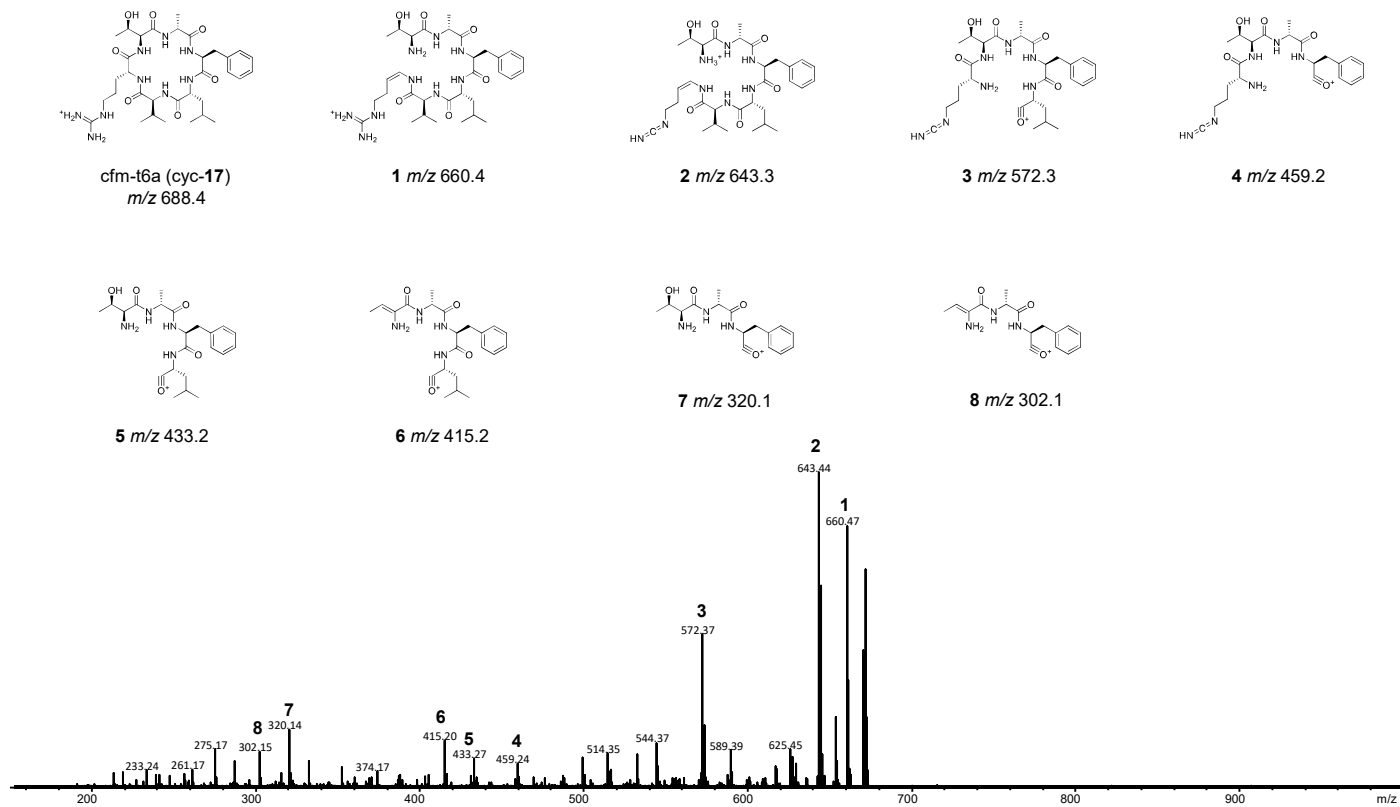

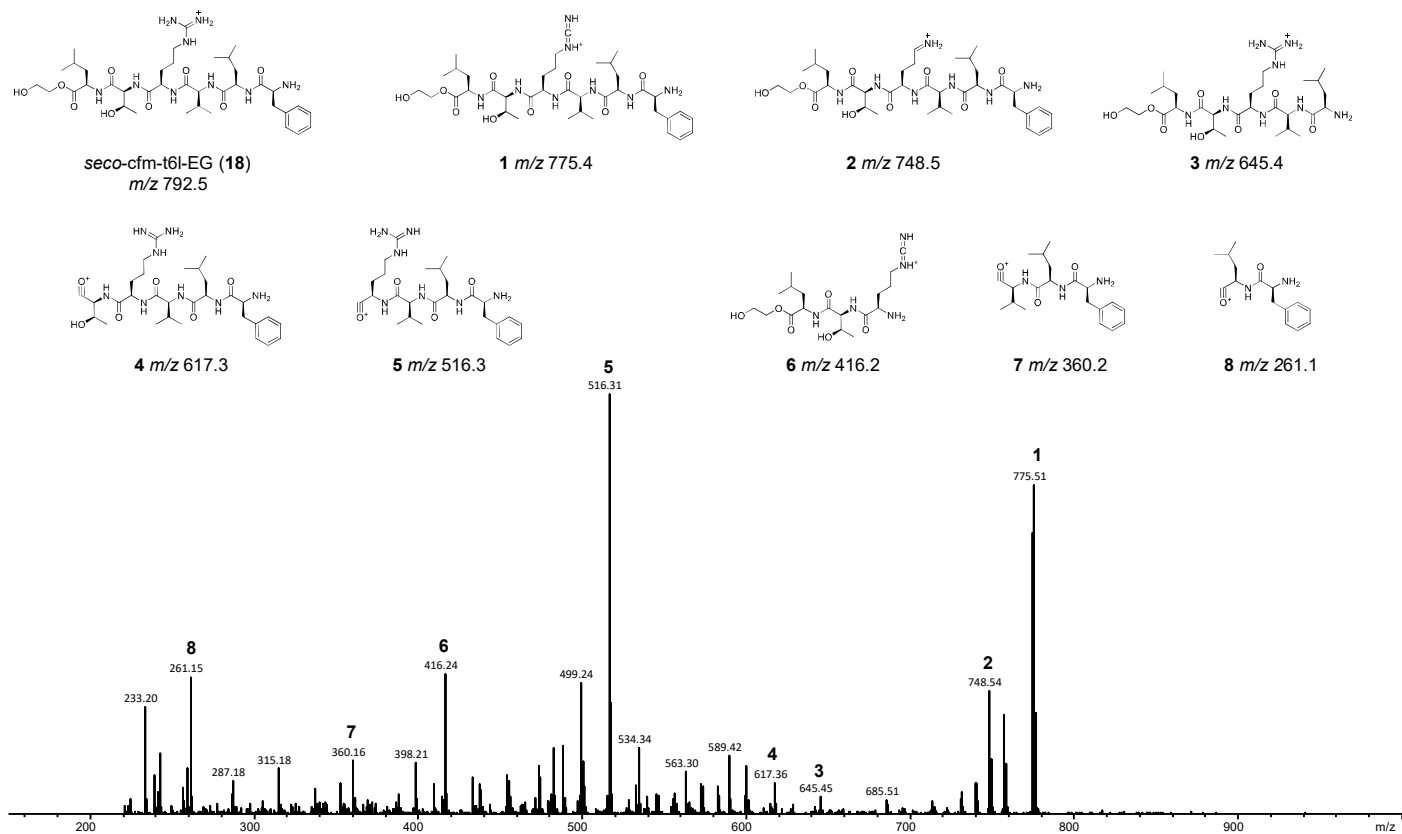

Figure S68. MS2 spectrum of *seco-cfm-t6l-EG* (18)

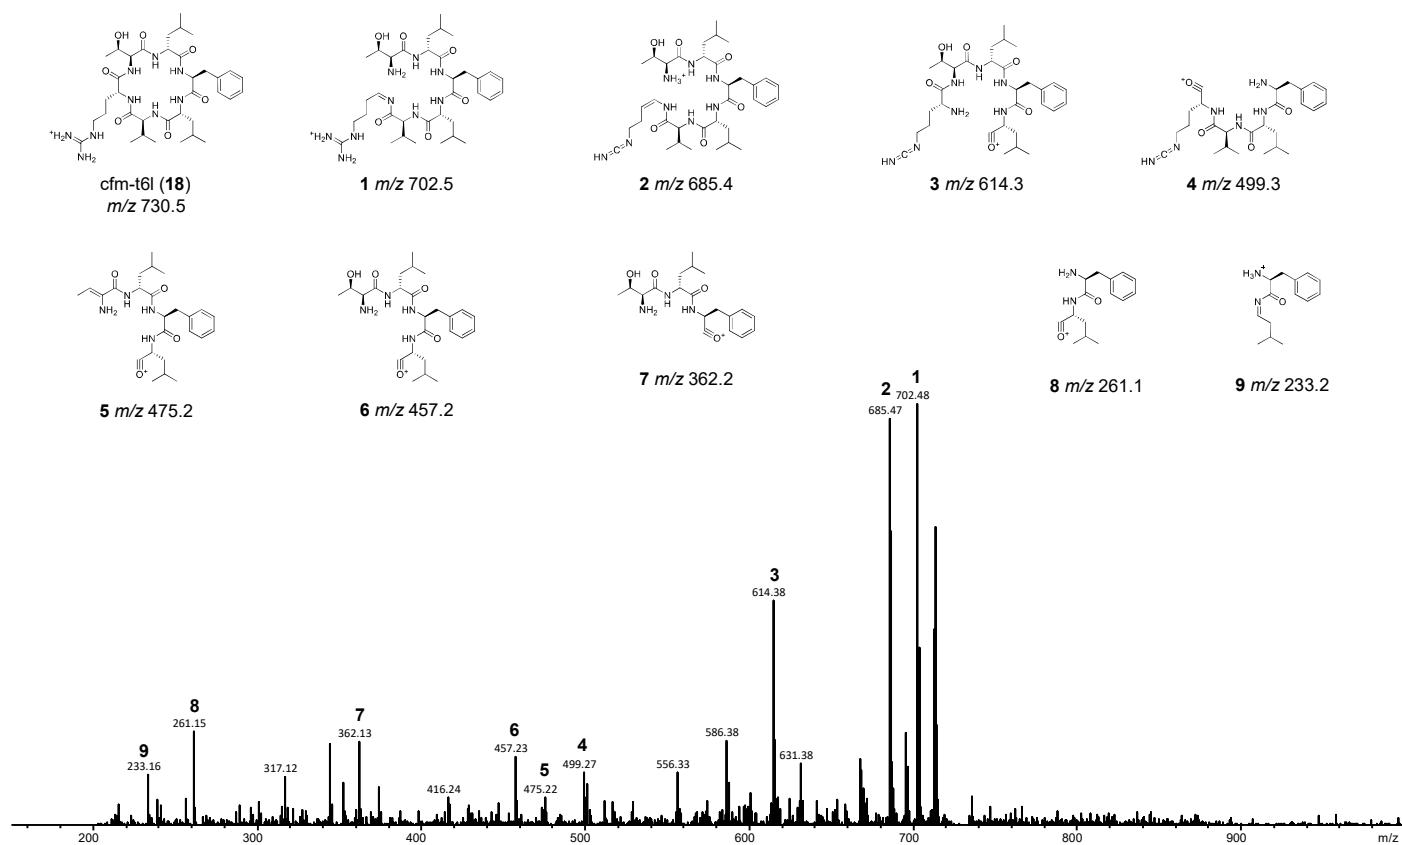

Figure S69. MS2 spectrum of *cfm-t6l* (cyc-18)

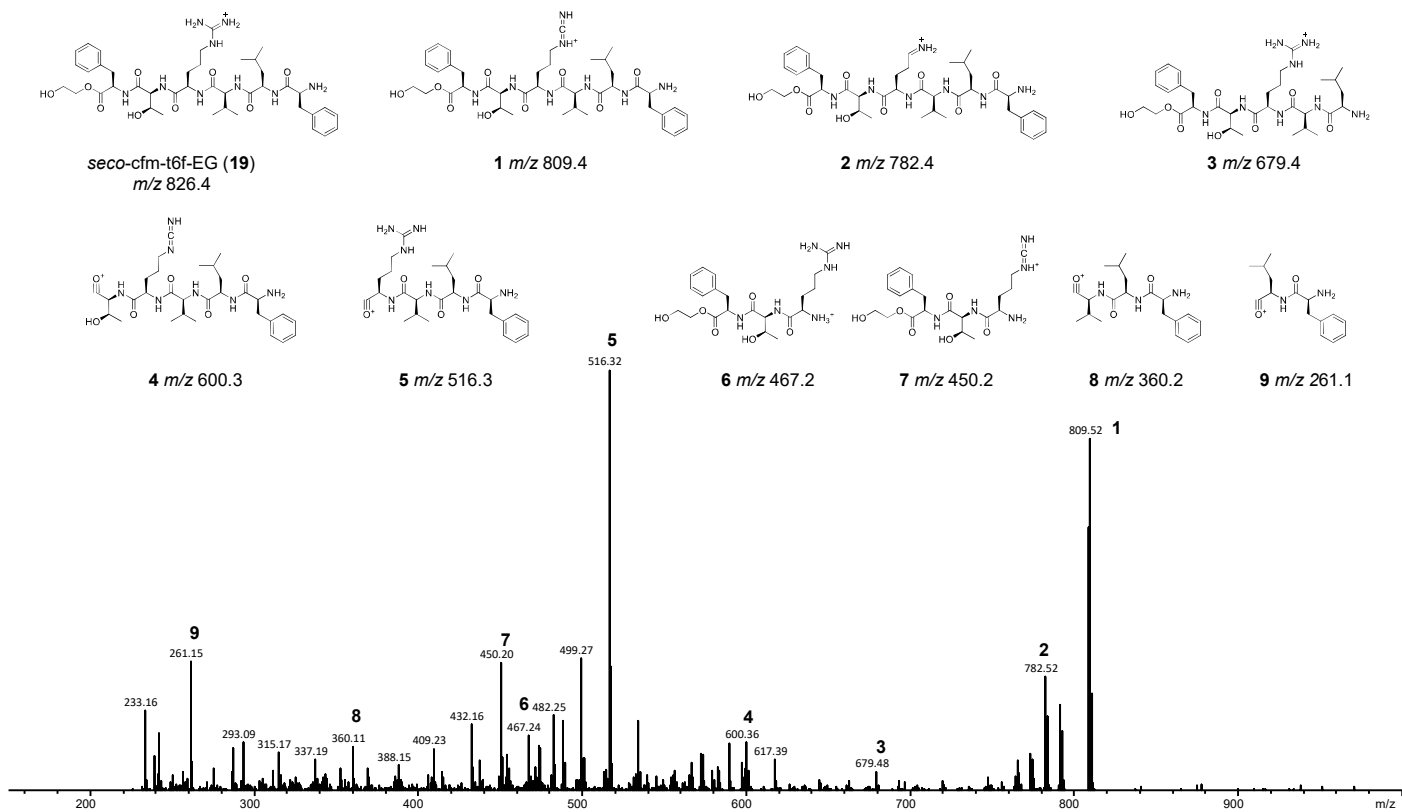

Figure S70. MS2 spectrum of *seco-cfm-t6f-EG* (19)

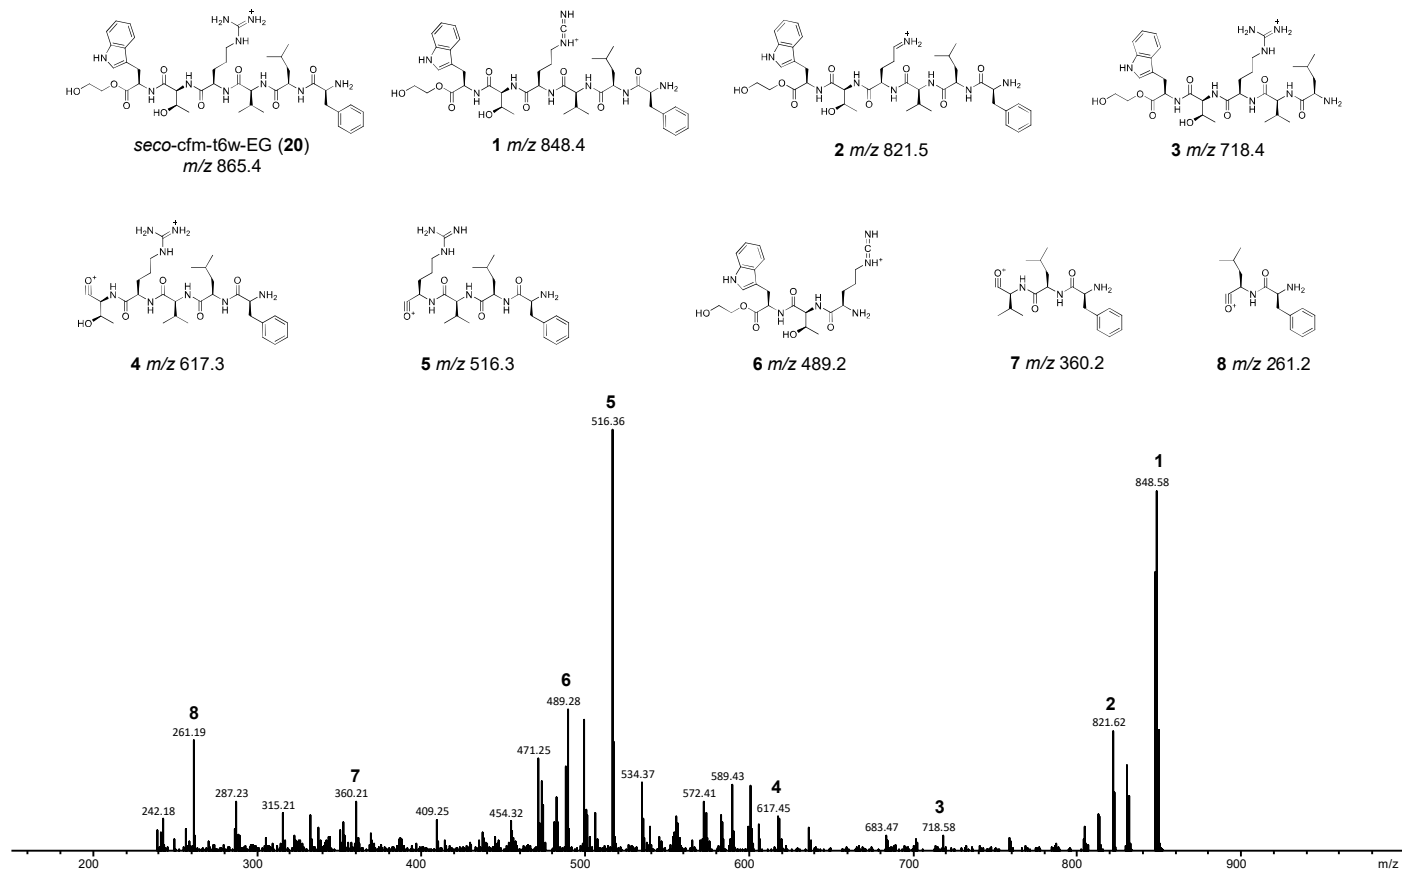

Figure S71. MS2 spectrum of *seco-cfm-t6w-EG* (20)

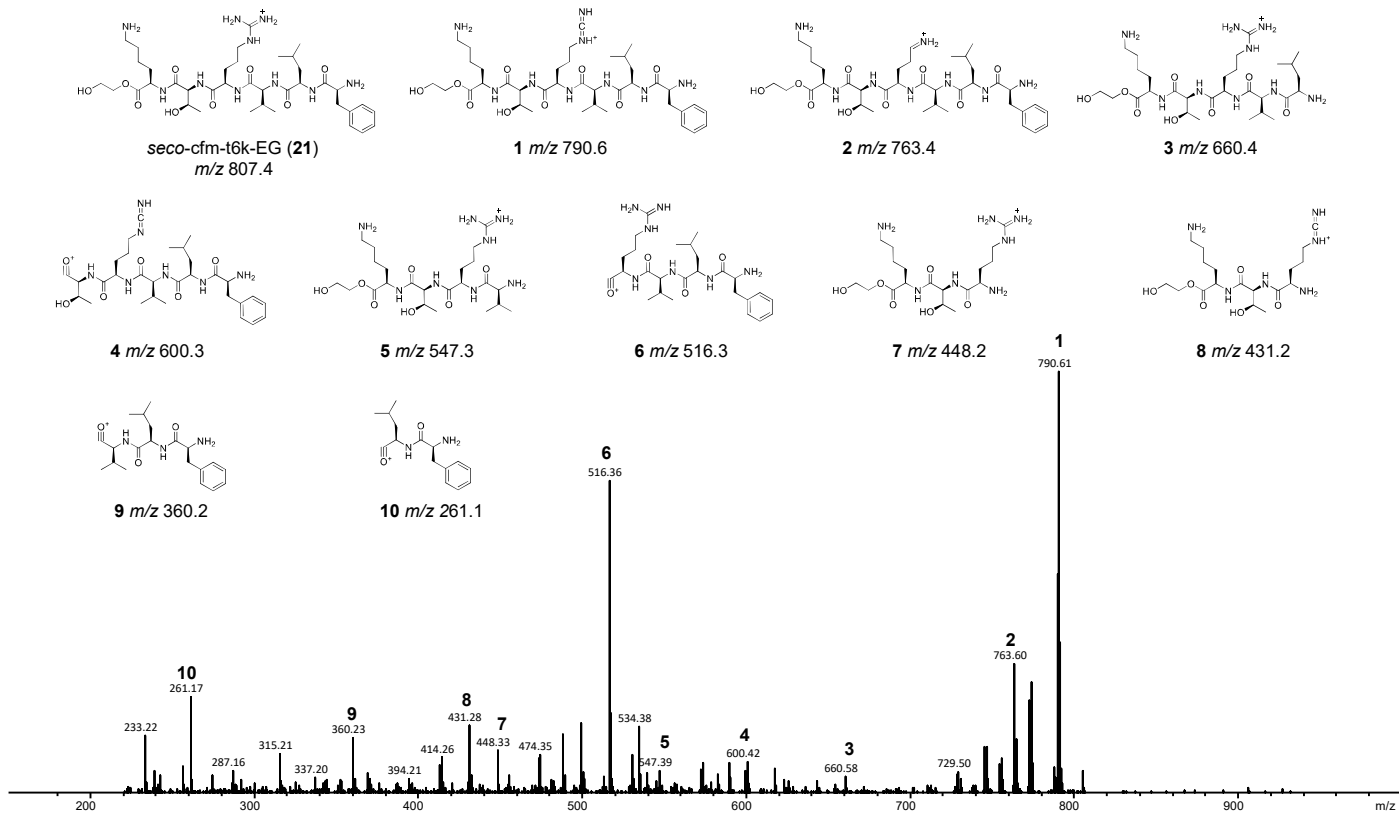

Figure S72. MS2 spectrum of *seco-cfm-t6k-EG* (21)

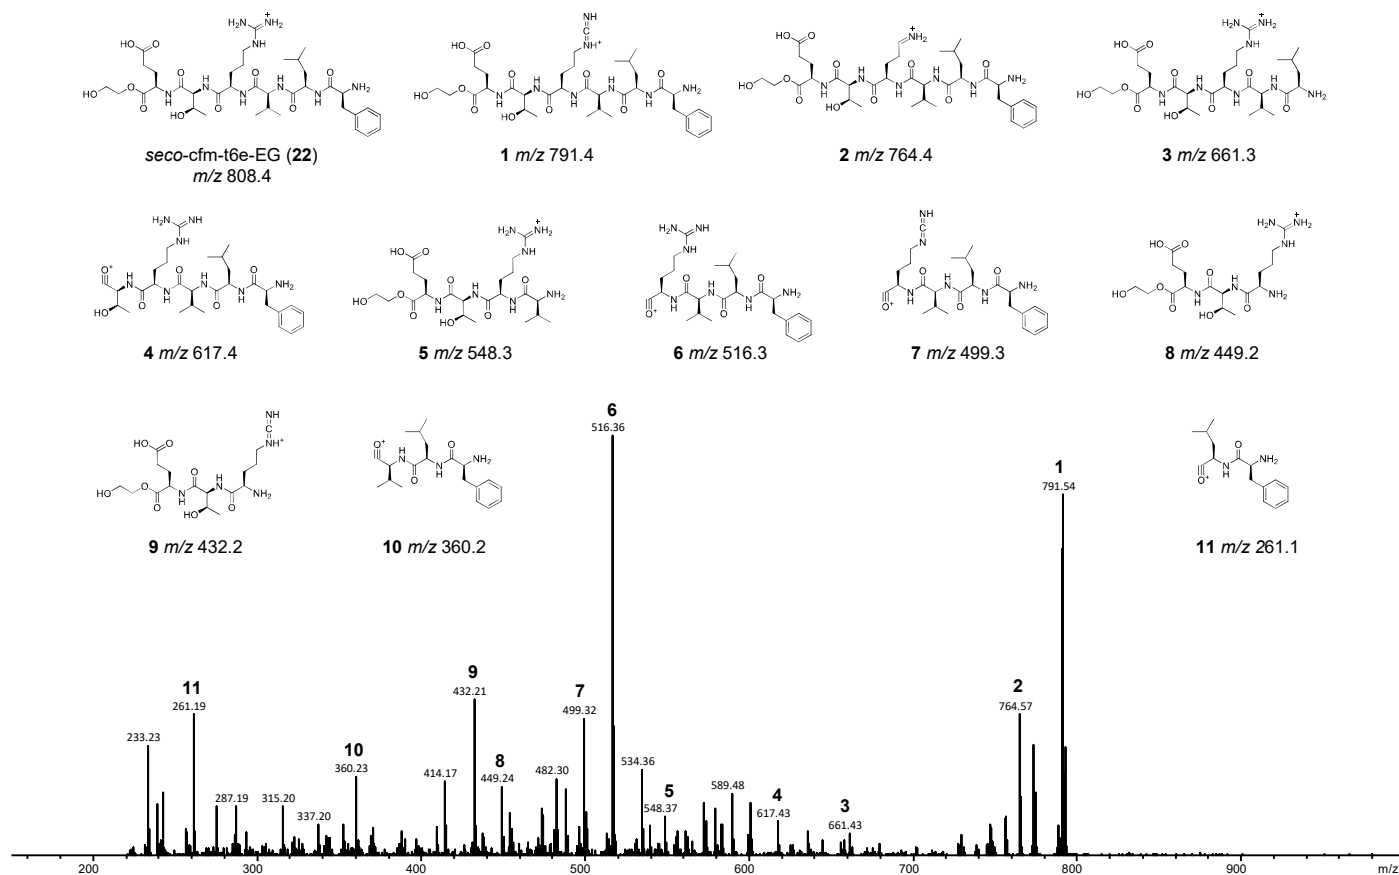

Figure S73. MS2 spectrum of *seco-cfm-t6e-EG* (22)

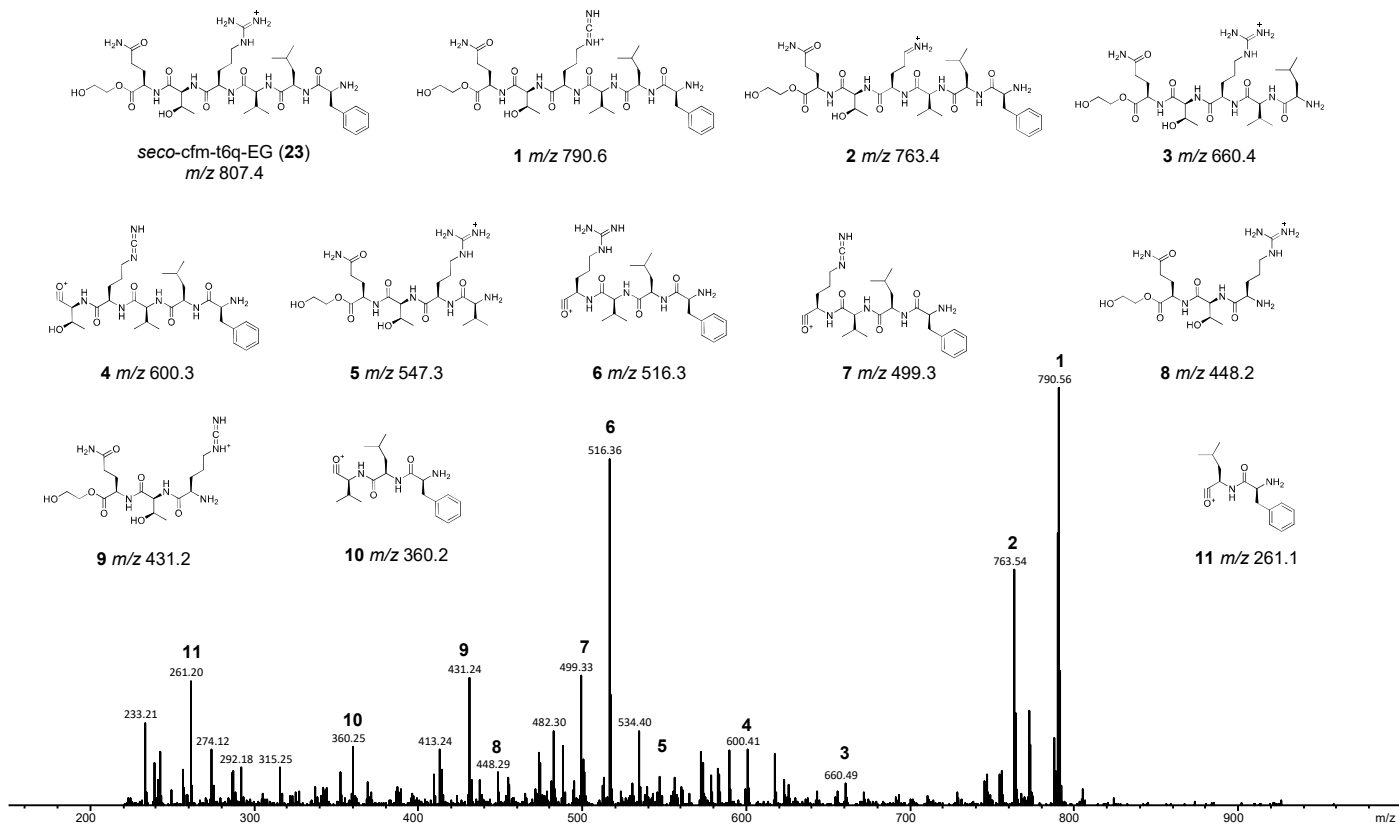

Figure S74. MS2 spectrum of *seco-cfm-t6q-EG* (23)

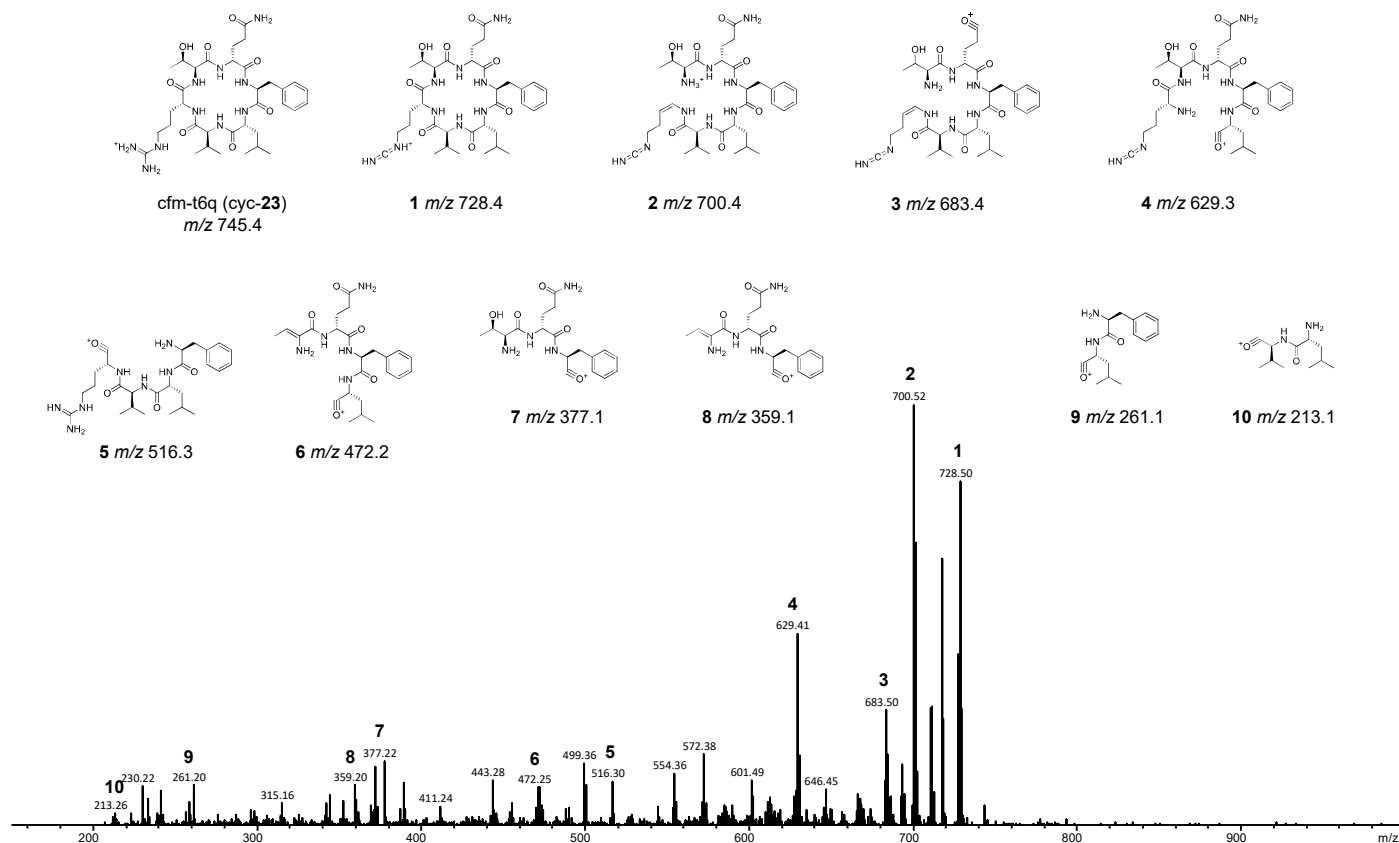

Figure S75. MS2 spectrum of *cfm-t6q* (cyc-23)



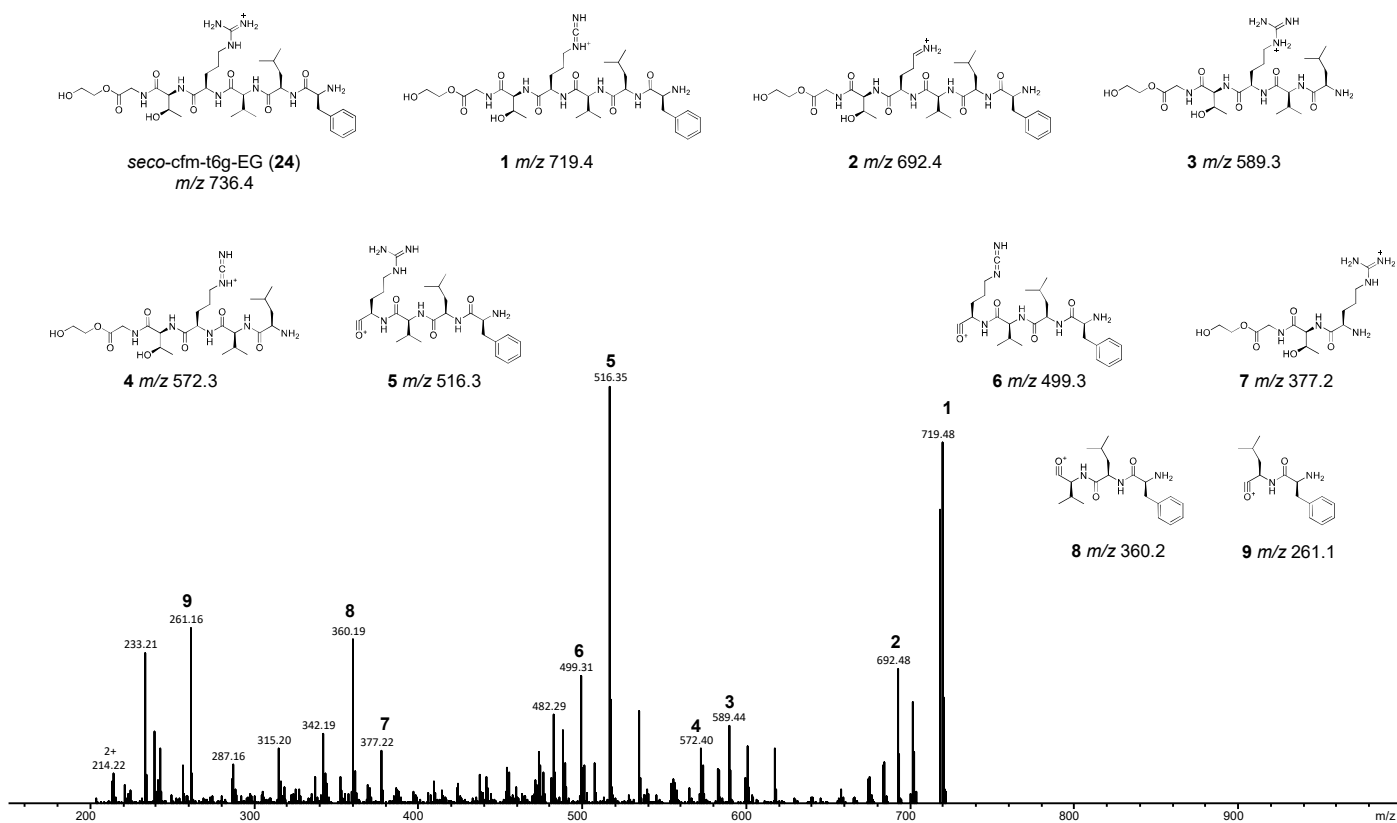

Figure S76. MS2 spectrum of *seco-cfm-t6g-EG* (24)

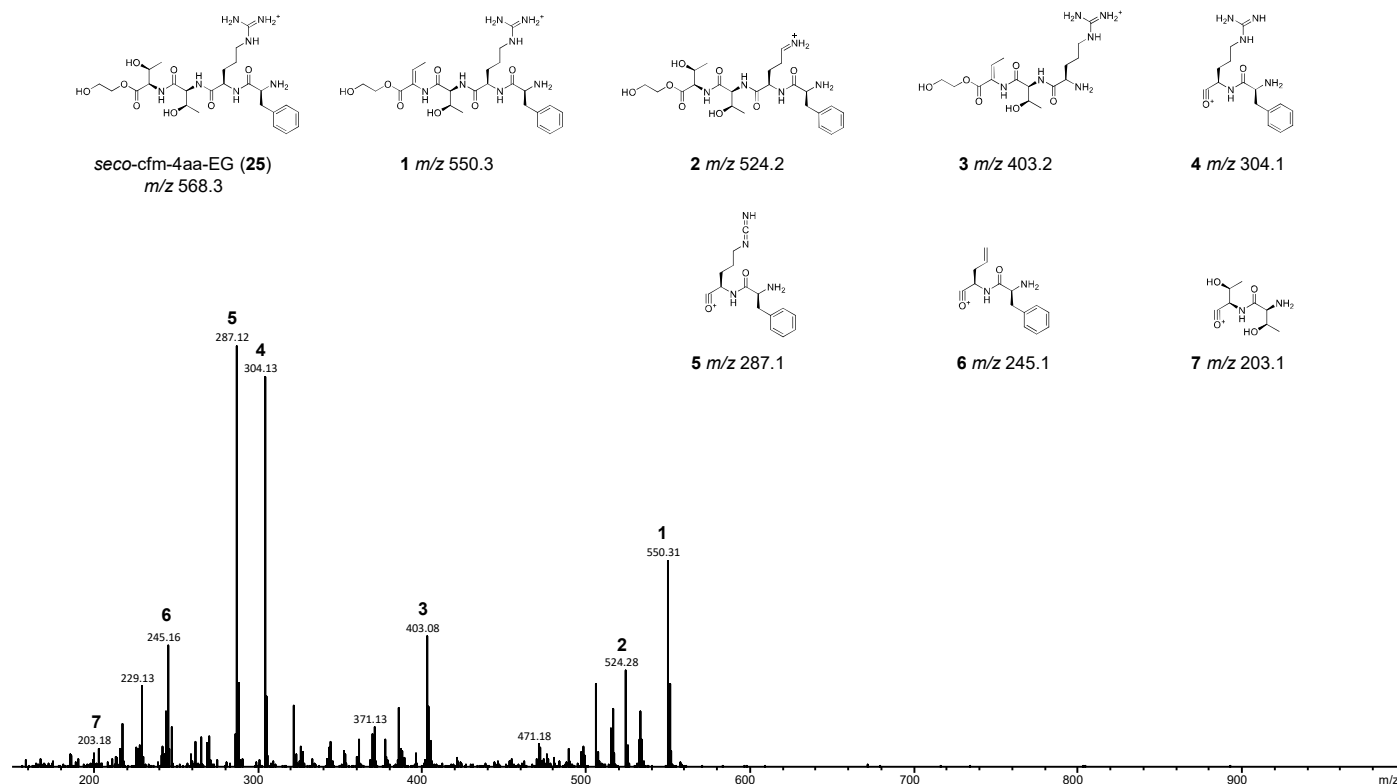

Figure S77. MS2 spectrum of *seco-cfm-4aa-EG* (25)

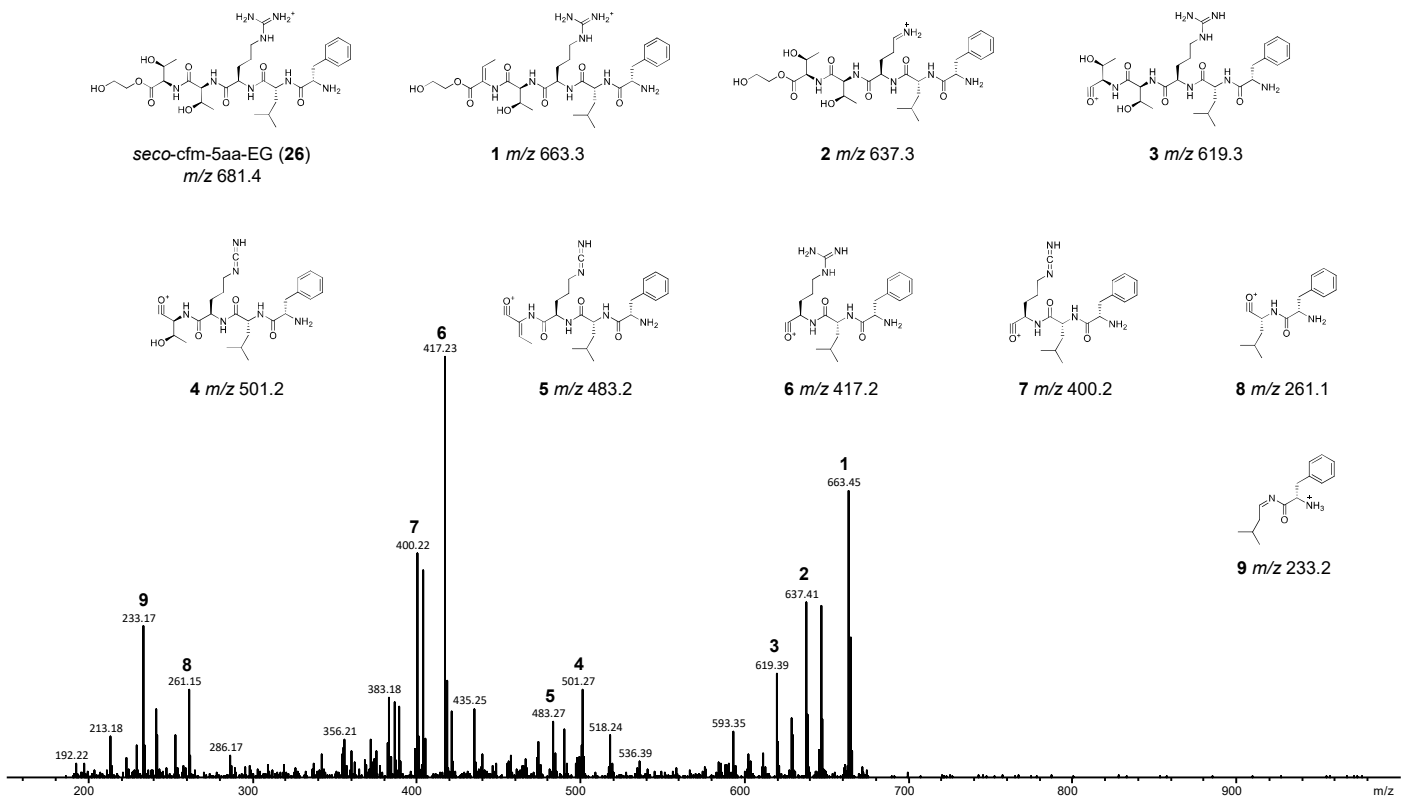

Figure S78. MS2 spectrum of *seco-cfm-5aa-EG* (26)

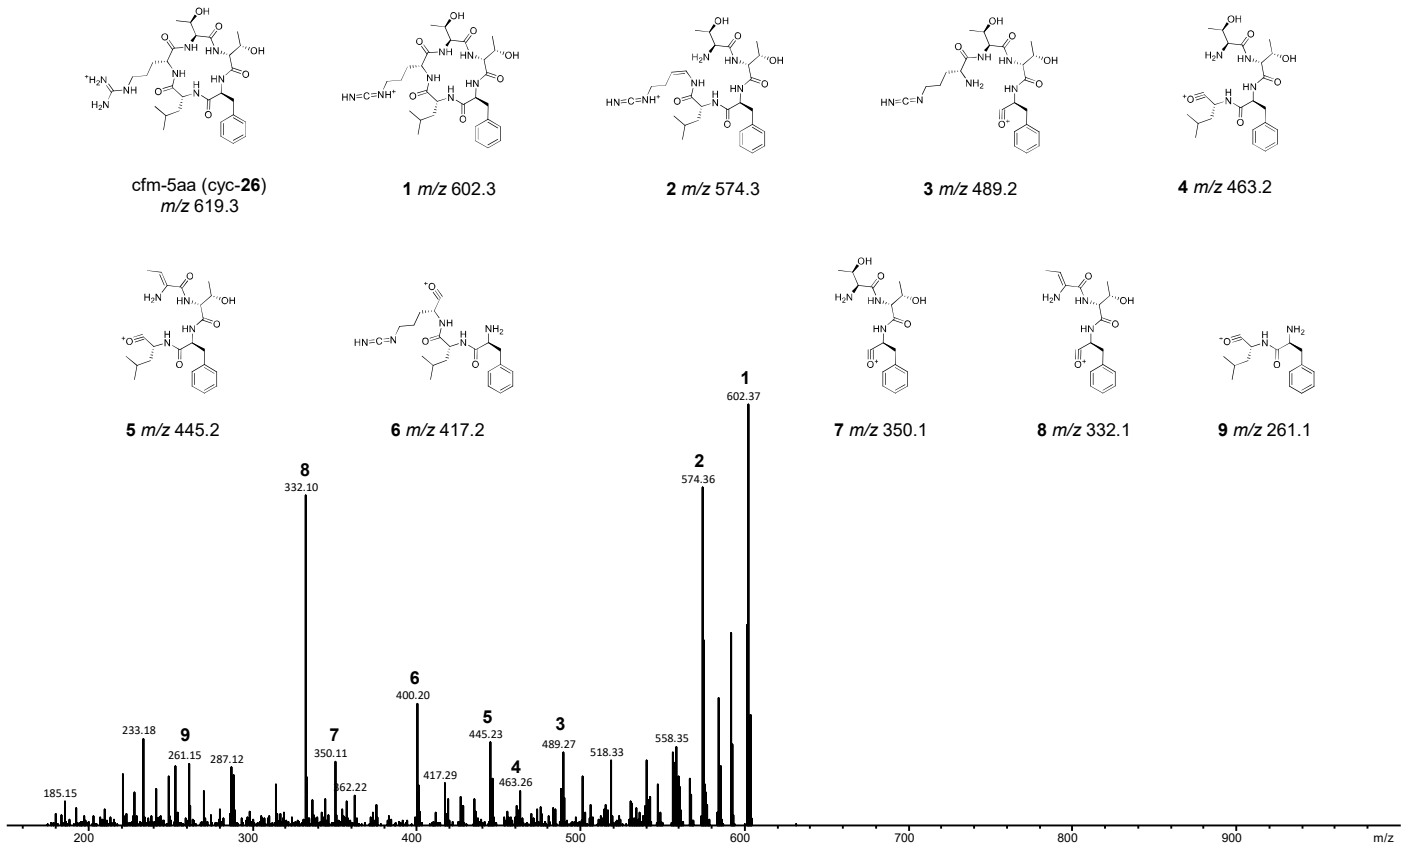

Figure S79. MS2 spectrum of *cfm-5aa* (cyc-26)

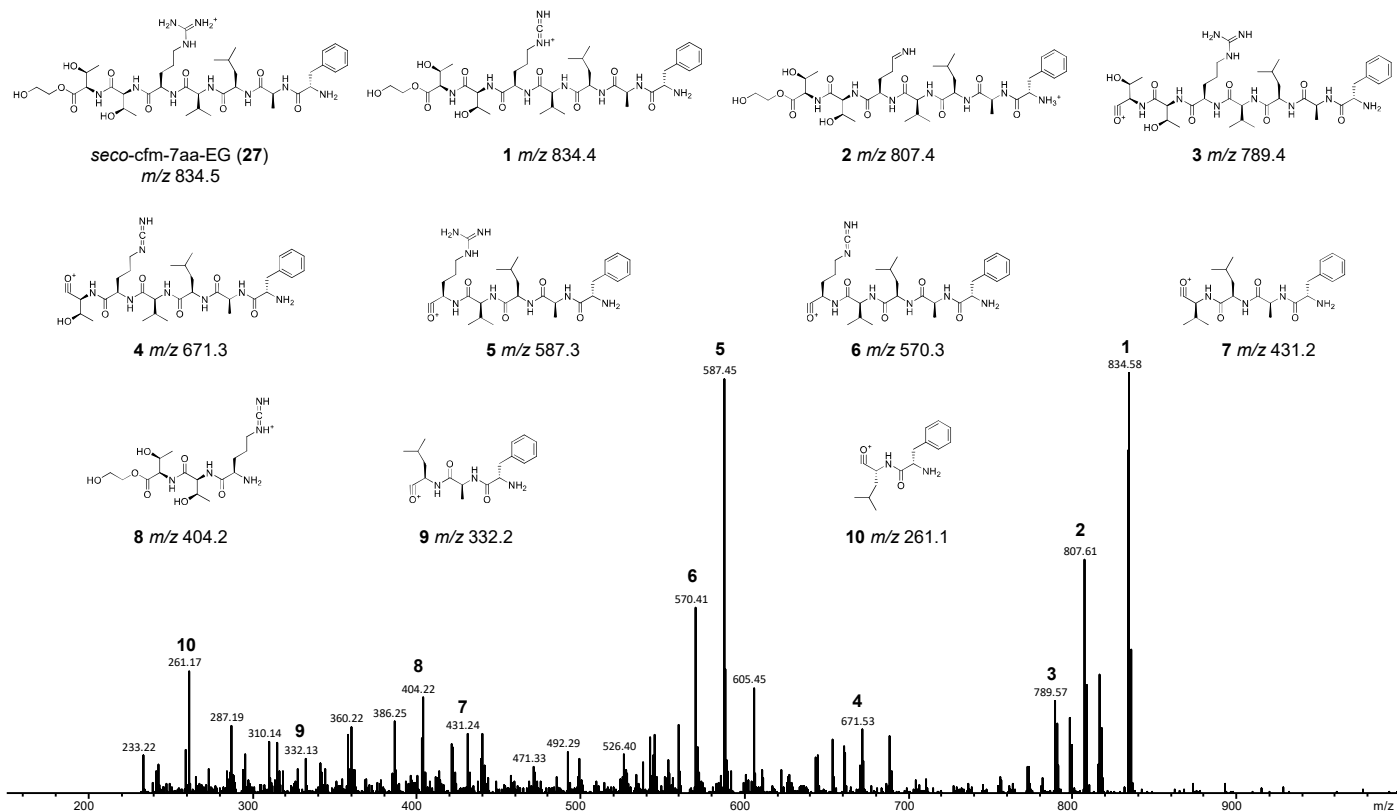

Figure S80. MS2 spectrum of *seco-cfm-7aa-EG* (27)

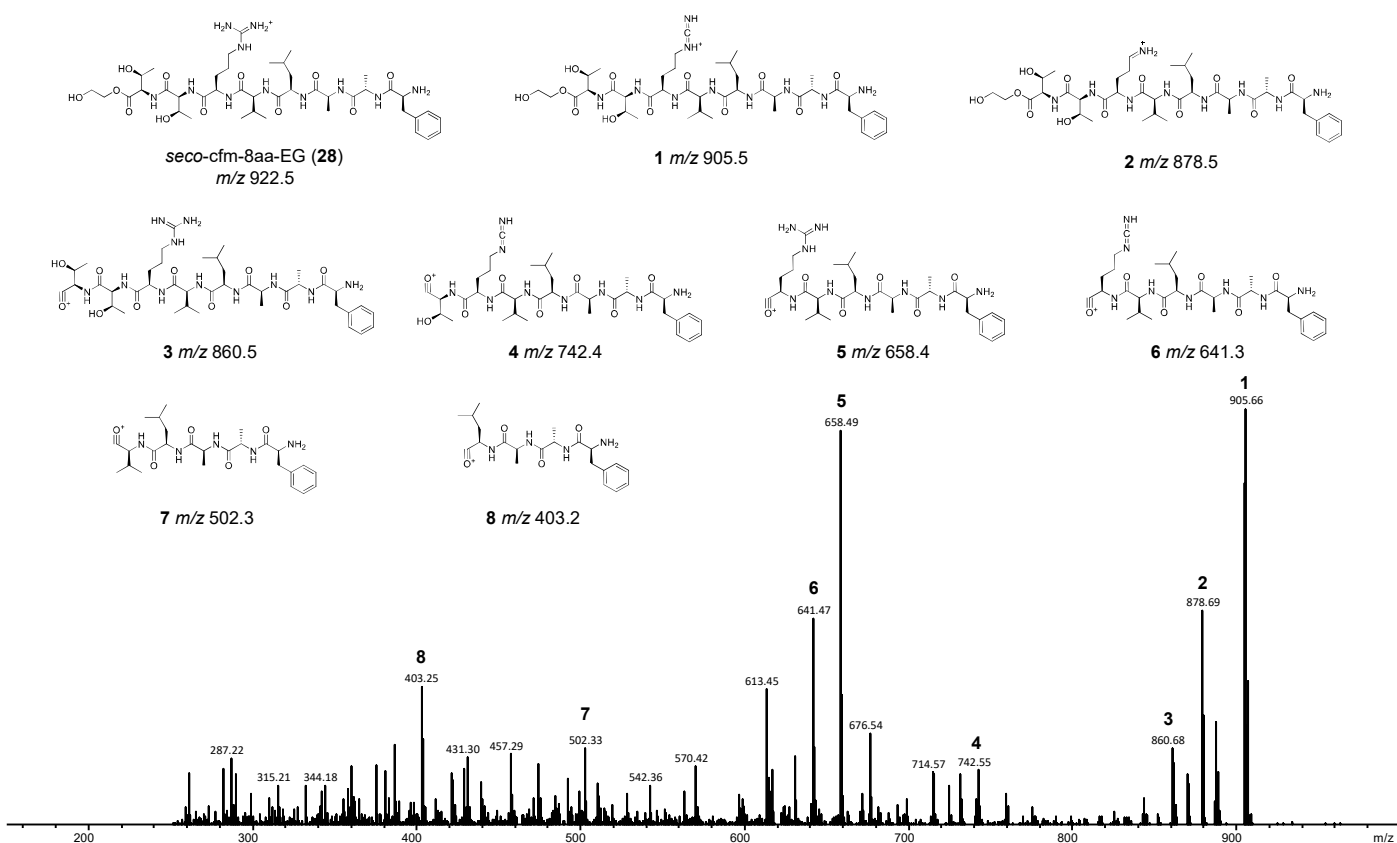

Figure S81. MS2 spectrum of *seco-cfm-8aa-EG* (28)

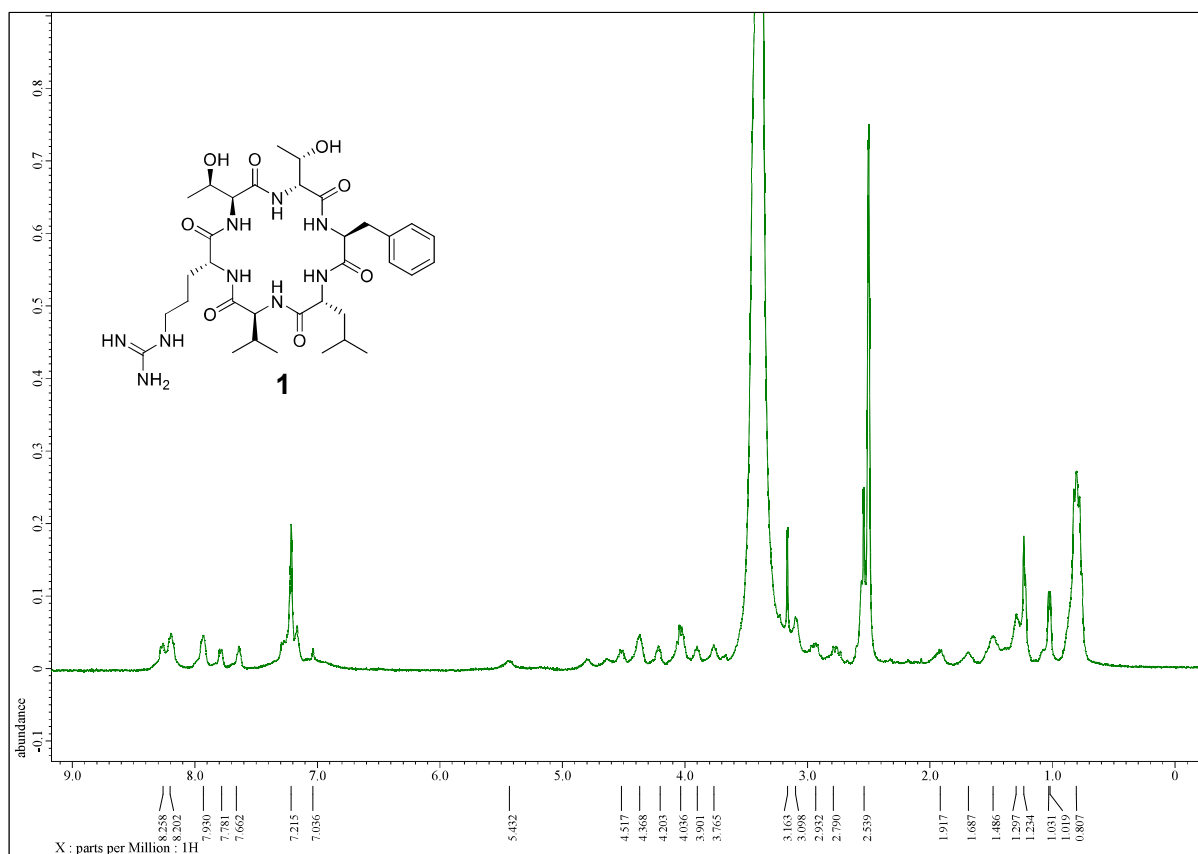

**Figure S82.**  $^1\text{H}$  NMR spectrum of cfm (**1**) in  $\text{DMSO-}d_6$  (400 MHz)

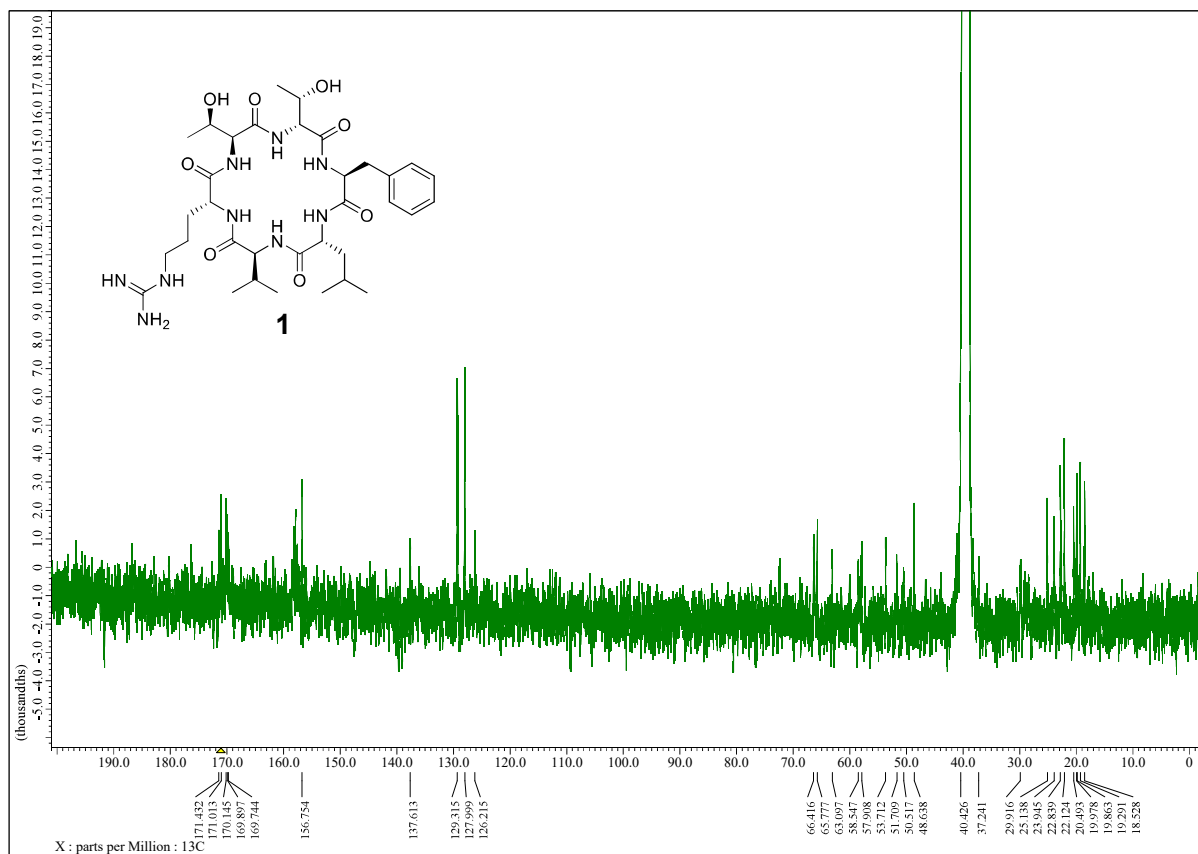

**Figure S83.**  $^{13}\text{C}$  NMR spectrum of cfm (**1**) in  $\text{DMSO-}d_6$  (100 MHz)

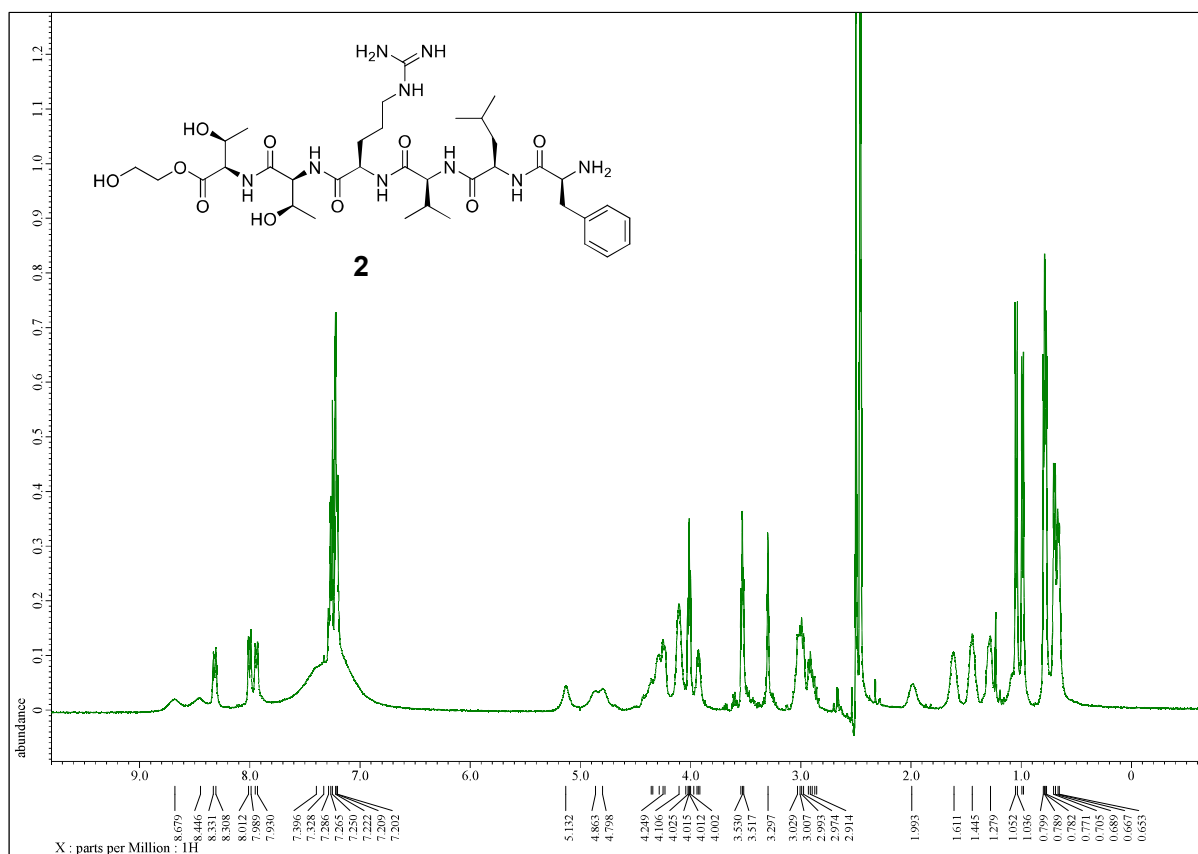

**Figure S84.** <sup>1</sup>H NMR spectrum of *seco*-cfm-EG (**2**) in DMSO-*d*<sub>6</sub> (400 MHz)

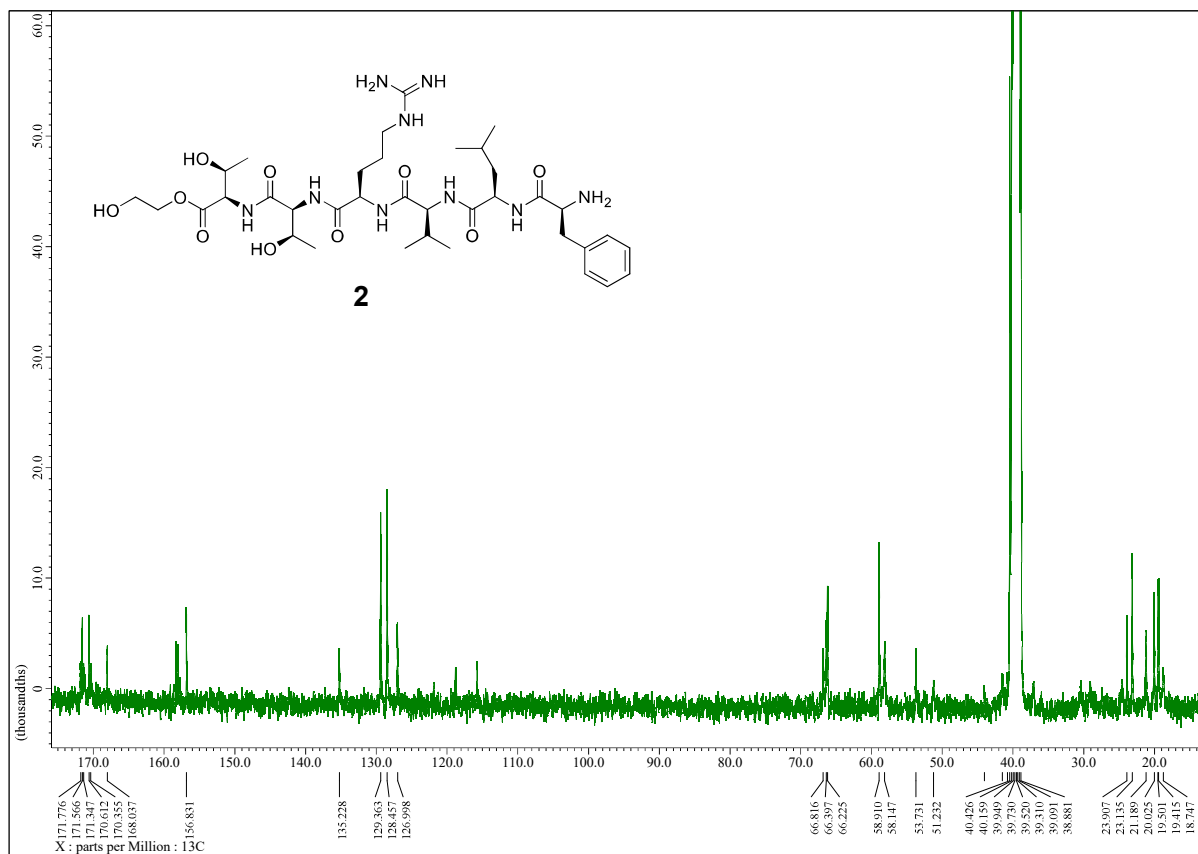

**Figure S85.** <sup>13</sup>C NMR spectrum of *seco*-cfm-EG (**2**) in DMSO-*d*<sub>6</sub> (100 MHz)

---

## References

- 1 M. Kobayashi, K. Fujita, K. Matsuda, T. Wakimoto, *J. Am. Chem. Soc.*, 2023, **145**, 3270–3275.
- 2 B. R. Terlouw, *et al. Nucleic Acids Res.* 2023, **51**, D603–D610.
- 3 C. L. M. Gilchrist, Y. H. Chooi, *Bioinformatics*, 2021, **37**, 2473–2475.
- 4 Y. Tanizawa, T. Fujisawa, Y. Nakamura, *Bioinformatics*, 2018, **34**, 1037–1039.
